# Supplementary material for: Genetic dissection of plant architecture and yield-related traits in Brassica napus
Source: PubMed Central journal article supplement (PMC4754947; doi:10.1038/srep21625), 2016-02-16
Supplement: srep21625-s1.pdf [file srep21625-s1.pdf]

**Genetic dissection of plant architecture and yield-related traits in  
*Brassica napus***

Guangqin Cai<sup>1,2</sup>, Qingyong Yang<sup>1</sup>, Hao Chen<sup>1</sup>, Qian Yang<sup>2</sup>, Chunyu Zhang<sup>2</sup>,  
Chuchuan Fan<sup>1</sup>, Yongming Zhou<sup>1,2,\*</sup>

<sup>1</sup>National Key Laboratory of Crop Genetic Improvement, Huazhong Agricultural University, Wuhan 430070, China

<sup>2</sup>Key Laboratory of Rapeseed Genetics and Breeding of Agriculture Ministry of China, Huazhong Agricultural University, Wuhan 430070, China

\*Corresponding author: Tel +86 (0)27 8728 6869; fax +86 (0)27 8728 1009; email ymzhou@mail.hzau.edu.cn

## **Additional Information**

### **Competing financial interests**

The authors have no competing interests as defined by Nature Publishing Group, or other interests that might be perceived to influence the results and/or discussion reported in this paper.

**Supplementary Information**

**Supplementary Table S1.** Performances of 20 evaluated plant architecture and yield related traits of two parents, F1, RF1, parental mean, and DH population mean, and range in the HJ-DH population in four environments.

| Trait           | Env. | Hua 5 <sup>a</sup>        | F1             | RF1            | J 7005         | Parental mean   | DH mean         | DH range    | Trait                    | Env. | Hua 5          | F1             | RF1            | J 7005         | Parental mean  | DH mean        | DH range    |
|-----------------|------|---------------------------|----------------|----------------|----------------|-----------------|-----------------|-------------|--------------------------|------|----------------|----------------|----------------|----------------|----------------|----------------|-------------|
| <b>PH (cm)</b>  | WH09 | 161.1±6.9 ab <sup>b</sup> | 166.8±13.1 a   | 152.1±5.4 bc   | 142.4±1.4 c    | 151.8±4.1 bc    | 147.4±7.6 c     | 122.5-168.3 | <b>MISN</b>              | WH09 | 96.4±7.5 a     | 94.2±8.9 a     | 90.2±2.5 ab    | 70.4±4.1 c     | 83.4±4.7 b     | 82.6±8.9 b     | 63.2-103.1  |
|                 | WH10 | 163.3±19.1 a              | 161.3±1.0 a    | 170.9±6.2 a    | 167.2±9.3 a    | 164.5±13.7 a    | 172.7±14.4 a    | 132.9-213.2 |                          | WH10 | 90.0±14.5 a    | 79.9±7.0 ab    | 82.7±3.4 ab    | 63.5±6.8 c     | 76.0±6.5 bc    | 79.9±7.9 ab    | 60.7-101.2  |
|                 | HG10 | 169.8±12.7 a              | 180.9±9.5 a    | 177.8±8.5 a    | 169.3±5.4 a    | 169.6±6.2 a     | 171.8±10.3 a    | 148.8-201.4 |                          | HG10 | 84.8±8.8 a     | 83.1±4.8 ab    | 81.4±3.4 ab    | 62.4±5.5 c     | 73.6±5.8 b     | 79.1±8.7 ab    | 62.2-98.6   |
|                 | GS11 | 138.8±10.8 a              | 137.2±14.9 a   | 142.9±12.3 a   | 131.5±6.1 a    | 135.2±7.2 a     | 132.8±10.7 a    | 107.6-170.5 |                          | GS11 | 66.9±25.4 a    | 58.7±2.7 a     | 57.1±3.1 a     | 53.6±6.2 a     | 60.3±12.0 a    | 55.2±7.7 a     | 36.1-74.7   |
| <b>BH (cm)</b>  | WH09 | 52.4±15.0 a               | 59.0±6.9 a     | 48.3±15.3 a    | 54.9±16.5 a    | 53.7±9.4 a      | 56.7±7.8 a      | 38.5-75.6   | <b>BSN</b>               | WH09 | 360.0±195.4 a  | 431.4±79.9 a   | 415.0±144.1 a  | 289.3±52.6 a   | 324.6±121.3 a  | 254.9±60.3 a   | 115.4-477.8 |
|                 | WH10 | 41.2±10.0 b               | 40.7±10.6 b    | 40.7±14.4 b    | 59.1±13.2 a    | 50.2±9.8 ab     | 59.4±16.4 a     | 21.7-98.9   |                          | WH10 | 277.3±71.5 c   | 429.4±22.6 ab  | 445.1±83.1 a   | 298.7±130.0 bc | 283.9±70.3 c   | 314.3±54.0 abc | 193.1-488.0 |
|                 | HG10 | 42.1±10.8 a               | 54.6±16.9 a    | 52.7±6.5 a     | 51.4±10.6 a    | 46.8±7.0 a      | 54.7±11.6 a     | 30.8-88.9   |                          | HG10 | 211.0±66.1 b   | 306.3±59.1 a   | 325.0±38.1 a   | 302.4±54.2 a   | 256.7±49.7 ab  | 253.7±51.0 ab  | 134.6-401.3 |
|                 | GS11 | 31.1±9.7 b                | 34.3±14.8 ab   | 37.3±11.8 ab   | 45.7±9.6 a     | 38.4±7.4 ab     | 36.6±10.5 ab    | 18.5-66.5   |                          | GS11 | 201.5±52.3 b   | 284.8±46.5 ab  | 346.6±144.8 a  | 264.0±64.8 ab  | 232.8±50.7 b   | 215.9±56.8 b   | 105.8-653.2 |
| <b>MIL (cm)</b> | WH09 | 68.0±4.4 a                | 62.5±7.5 ab    | 60.8±2.6 ab    | 44.6±5.6 c     | 56.3±3.9 b      | 57.7±5.2 b      | 44.1-77.1   | <b>PSN</b>               | WH09 | 456.7±198.4 a  | 525.6±85.5 a   | 505.2±146.6 a  | 359.7±56.5 a   | 408.2±124.5 a  | 337.7±64.0 a   | 178.6-571.5 |
|                 | WH10 | 81.1±7.1 a                | 70.5±7.0 ab    | 69.2±4.6 b     | 49.9±9.3 c     | 65.0±4.3 b      | 67.3±7.6 b      | 44.3-88.9   |                          | WH10 | 367.3±84.4 bc  | 509.3±15.6 ab  | 527.9±86.5 a   | 362.3±133.7 bc | 359.9±75.7 c   | 394.2±58.4 abc | 256.3-578.8 |
|                 | HG10 | 81.0±8.9 a                | 73.2±3.8 b     | 69.6±1.3 b     | 53.2±2.7 c     | 67.1±4.4 b      | 70.8±5.2 b      | 50.7-87.6   |                          | HG10 | 295.7±72.3 b   | 389.4±63.9 a   | 406.4±41.5 a   | 364.8±54.7 a   | 330.3±53.4 ab  | 332.8±56.8 ab  | 196.9-481.9 |
|                 | GS11 | 76.0±4.4 a                | 68.3±3.1 b     | 67.0±4.5 b     | 50.7±4.7 d     | 63.3±3.5 c      | 65.8±6.9 bc     | 49.2-80.0   |                          | GS11 | 268.4±62.6 b   | 343.5±47.7 ab  | 403.7±146.5 a  | 317.7±63.8 ab  | 293.1±51.7 b   | 271.0±59.5 b   | 141.9-713.2 |
| <b>BS (cm)</b>  | WH09 | 40.7±12.0 a               | 45.4±7.5 a     | 43.1±7.6 a     | 42.8±12.5 a    | 41.8±9.2 a      | 33.0±6.3 a      | 20.3-52.0   | <b>MISNP</b>             | WH09 | 0.276±0.074 a  | 0.210±0.042 a  | 0.207±0.065 a  | 0.222±0.048 a  | 0.249±0.044 a  | 0.272±0.042 a  | 0.171-0.451 |
|                 | WH10 | 41.0±7.3 b                | 50.2±2.6 ab    | 61.0±7.8 a     | 58.2±6.3 a     | 49.3±5.3 b      | 46.0±6.4 b      | 30.6-65.3   |                          | WH10 | 0.250±0.030 a  | 0.157±0.018 b  | 0.159±0.020 b  | 0.187±0.044 b  | 0.220±0.024 a  | 0.208±0.025 ab | 0.139-0.276 |
|                 | HG10 | 46.7±7.6 c                | 53.2±10.1 bc   | 55.5±3.0 b     | 64.7±5.8 a     | 55.7±5.0 ab     | 46.2±5.7 c      | 35.8-71.5   |                          | HG10 | 0.299±0.059 a  | 0.216±0.022 bc | 0.201±0.012 bc | 0.174±0.027 c  | 0.236±0.034 b  | 0.245±0.028 b  | 0.168-0.334 |
|                 | GS11 | 31.8±3.8 b                | 34.6±1.2 a     | 38.6±6.6 a     | 35.2±5.7 ab    | 33.5±3.6 b      | 30.5±5.2 b      | 19.6-47.4   |                          | GS11 | 0.250±0.062 a  | 0.173±0.020 b  | 0.152±0.042 b  | 0.175±0.040 b  | 0.213±0.042 a  | 0.214±0.035 ab | 0.140-0.315 |
| <b>BHP</b>      | WH09 | 0.329±0.096 a             | 0.358±0.053 a  | 0.315±0.090 a  | 0.389±0.122 a  | 0.359±0.070 a   | 0.386±0.050 a   | 0.262-0.485 | <b>MIY (g)</b>           | WH09 | 5.62±0.95 a    | 4.83±0.53 ab   | 3.82±0.75 abc  | 2.32±2.01 c    | 3.97±0.91 abc  | 3.65±0.62 bc   | 2.06-5.31   |
|                 | WH10 | 0.250±0.045 c             | 0.252±0.064 bc | 0.237±0.082 c  | 0.353±0.072 a  | 0.303±0.043 abc | 0.339±0.073 ab  | 0.160-0.508 |                          | WH10 | 5.62±0.97 a    | 3.44±0.69 b    | 3.74±0.58 b    | 1.45±0.35 c    | 3.61±0.61 b    | 3.66±0.62 b    | 1.82-5.83   |
|                 | HG10 | 0.247±0.057 a             | 0.300±0.083 a  | 0.296±0.026 a  | 0.302±0.056 a  | 0.275±0.038 a   | 0.316±0.055 a   | 0.181-0.442 |                          | HG10 | 6.08±0.77 a    | 4.42±0.32 b    | 4.18±0.28 b    | 1.62±0.31 c    | 3.85±0.45 b    | 4.28±0.66 b    | 2.17-6.90   |
|                 | GS11 | 0.221±0.058 c             | 0.245±0.079 bc | 0.260±0.069 bc | 0.346±0.063 a  | 0.284±0.045 ab  | 0.270±0.061 abc | 0.146-0.436 |                          | GS11 | 4.60±0.80 a    | 3.04±0.67 bc   | 3.82±0.60 b    | 0.99±0.26 d    | 2.80±0.47 c    | 2.70±0.65 c    | 1.07-4.13   |
| <b>MILP</b>     | WH09 | 0.422±0.030 a             | 0.374±0.030 ab | 0.401±0.031 a  | 0.313±0.037 b  | 0.367±0.018 ab  | 0.392±0.033 a   | 0.283-0.504 | <b>BY (g)</b>            | WH09 | 16.70±6.96 ab  | 19.78±3.80 a   | 16.87±4.13 ab  | 7.85±5.81 c    | 12.27±5.76 abc | 10.72±2.84 bc  | 4.94-24.48  |
|                 | WH10 | 0.500±0.044 a             | 0.437±0.046 ab | 0.406±0.036 b  | 0.299±0.054 c  | 0.399±0.037 b   | 0.395±0.071 b   | 0.228-0.601 |                          | WH10 | 14.23±4.22 a   | 14.00±0.87 a   | 15.69±2.48 a   | 6.85±3.37 c    | 10.86±2.85 bc  | 11.99±2.13 ab  | 6.07-16.59  |
|                 | HG10 | 0.477±0.036 a             | 0.405±0.036 b  | 0.392±0.019 b  | 0.315±0.019 c  | 0.396±0.019 b   | 0.414±0.039 b   | 0.280-0.521 |                          | HG10 | 12.24±5.08 a   | 13.95±2.98 a   | 14.56±1.48 a   | 7.55±2.54 b    | 9.90±2.53 ab   | 10.80±2.26 ab  | 4.79-18.73  |
|                 | GS11 | 0.549±0.033 a             | 0.502±0.061 b  | 0.470±0.028 b  | 0.385±0.031 c  | 0.467±0.017 b   | 0.501±0.065 b   | 0.347-0.629 |                          | GS11 | 12.05±4.23 b   | 13.11±2.30 b   | 20.16±8.47 a   | 5.25±1.63 c    | 8.65±2.55 c    | 9.45±2.52 bc   | 2.64-18.54  |
| <b>BSP</b>      | WH09 | 0.249±0.071 a             | 0.268±0.028 a  | 0.284±0.060 a  | 0.298±0.087 a  | 0.273±0.053 a   | 0.222±0.038 a   | 0.147-0.333 | <b>PY (g)</b>            | WH09 | 22.32±7.49 ab  | 24.61±4.32 a   | 20.69±3.63 ab  | 10.17±7.81 c   | 16.24±6.66 abc | 14.36±3.11 bc  | 7.36-29.79  |
|                 | WH10 | 0.250±0.029 c             | 0.311±0.018 ab | 0.357±0.048 a  | 0.348±0.029 a  | 0.299±0.021 bc  | 0.266±0.029 bc  | 0.201-0.346 |                          | WH10 | 19.85±5.06 a   | 17.44±1.47 a   | 19.43±2.97 a   | 8.30±3.67 c    | 14.47±3.41 bc  | 15.64±2.53 ab  | 8.12-21.94  |
|                 | HG10 | 0.276±0.047 b             | 0.294±0.056 b  | 0.312±0.010 b  | 0.383±0.042 a  | 0.330±0.031 ab  | 0.270±0.033 b   | 0.204-0.384 |                          | HG10 | 18.32±5.74 a   | 18.37±3.29 a   | 18.74±1.22 a   | 9.18±2.79 b    | 13.75±2.92 ab  | 15.08±2.76 a   | 7.16-23.95  |
|                 | GS11 | 0.230±0.035 a             | 0.254±0.020 a  | 0.271±0.043 a  | 0.269±0.048 a  | 0.249±0.034 a   | 0.229±0.035 a   | 0.155-0.317 |                          | GS11 | 16.65±4.88 b   | 16.15±2.41 b   | 23.98±9.00 a   | 6.24±1.82 d    | 11.44±2.92 cd  | 12.15±2.82 bc  | 4.54-21.98  |
| <b>BN</b>       | WH09 | 7.3±2.1 b                 | 8.7±0.6 ab     | 8.8±1.1 ab     | 11.9±2.8 a     | 9.6±2.3 ab      | 7.0±1.0 b       | 5.3-10.1    | <b>MIYP</b>              | WH09 | 0.308±0.065 ab | 0.240±0.042 ab | 0.214±0.088 b  | 0.268±0.030 ab | 0.288±0.026 ab | 0.288±0.052 ab | 0.160-0.483 |
|                 | WH10 | 6.5±0.8 d                 | 8.5±0.2 c      | 10.9±0.1 b     | 13.4±1.6 a     | 10.0±0.9 bc     | 8.5±1.3 c       | 5.3-12.5    |                          | WH10 | 0.291±0.044 a  | 0.196±0.026 b  | 0.193±0.014 b  | 0.191±0.047 b  | 0.239±0.030 a  | 0.238±0.030 ab | 0.147-0.320 |
|                 | HG10 | 6.6±0.9 c                 | 9.2±1.3 b      | 9.1±1.2 b      | 11.9±0.9 a     | 9.2±0.7 b       | 7.6±0.8 c       | 5.8-10.7    |                          | HG10 | 0.351±0.074 a  | 0.243±0.025 bc | 0.224±0.028 bc | 0.183±0.029 c  | 0.267±0.031 b  | 0.291±0.032 ab | 0.214-0.380 |
|                 | GS11 | 5.4±0.5 c                 | 6.0±0.7 bc     | 6.7±1.3 ab     | 7.2±1.0 a      | 6.3±0.7 bc      | 5.7±0.8 bc      | 4.2-8.2     |                          | GS11 | 0.285±0.044 a  | 0.190±0.047 bc | 0.168±0.042 c  | 0.163±0.028 c  | 0.224±0.033 ab | 0.233±0.052 b  | 0.112-0.419 |
| <b>BTL (cm)</b> | WH09 | 500.5±170.3 a             | 541.2±49.6 a   | 546.8±137.9 a  | 477.3±179.2 a  | 488.9±163.3 a   | 388.8±75.5 a    | 237.3-639.4 | <b>SSN (10 siliques)</b> | WH09 | 152.5±9.4 a    | 142.7±5.4 ab   | 164.8±29.4 a   | 86.9±27.7 c    | 119.7±13.5 b   | 147.5±29.8 ab  | 39.5-230.9  |
|                 | WH10 | 530.1±72.6 c              | 708.8±50.9 abc | 877.5±99.4 a   | 714.7±194.9 ab | 618.2±86.1 bc   | 595.1±73.0 bc   | 418.5-764.1 |                          | WH10 | 173.8±19.4 b   | 204.7±10.6 a   | 197.2±17.1 ab  | 120.0±20.3 d   | 148.2±15.0 c   | 184.2±32.5 ab  | 86.6-262.8  |
|                 | HG10 | 516.6±121.0 b             | 719.2±145.0 a  | 712.3±70.2 a   | 713.8±81.8 a   | 615.2±58.0 ab   | 546.1±78.7 b    | 365.7-845.5 |                          | HG10 | 195.4±21.2 a   | 195.8±7.5 a    | 194.5±21.3 a   | 115.8±8.5 c    | 155.6±10.5 b   | 191.9±30.5 a   | 77.8-250.6  |
|                 | GS11 | 398.0±54.1 b              | 418.7±50.5 ab  | 488.9±131.0 a  | 368.3±61.2 b   | 383.2±53.3 b    | 364.2±50.2 b    | 254.9-506.4 |                          | GS11 | 228.8±18.2 a   | 205.4±23.6 ab  | 219.1±18.9 a   | 92.6±17.3 d    | 160.7±11.3 c   | 188.0±40.6 bc  | 72.2-294.7  |
| <b>BAL (cm)</b> | WH09 | 67.8±7.5 a                | 61.9±4.1 ab    | 61.8±7.4 ab    | 39.4±5.4 c     | 53.6±5.2 b      | 55.1±5.3 b      | 43.3-76.9   | <b>TSW (g)</b>           | WH09 | 3.717±0.260 a  | 3.451±0.069 a  | 3.362±0.238 ab | 3.301±0.525 ab | 3.509±0.198 a  | 2.909±0.405 b  | 2.295-4.132 |
|                 | WH10 | 81.1±6.8 a                | 83.0±7.6 a     | 80.7±9.1 a     | 52.8±8.3 c     | 66.5±4.0 b      | 71.1±9.4 ab     | 46.5-97.9   |                          | WH10 | 3.652±0.573 a  | 2.678±0.245 b  | 2.658±0.115 b  | 2.525±0.373 b  | 3.099±0.366 b  | 2.445±0.356 b  | 1.858-3.996 |
|                 | HG10 | 78.2±10.0 a               | 78.1±6.6 a     | 78.6±3.4 a     | 60.1±6.2 b     | 69.1±5.6 ab     | 72.0±6.5 a      | 49.7-91.2   |                          | HG10 | 3.161±0.263 a  | 2.403±0.051 b  | 2.475±0.024 b  | 1.880±0.214 c  | 2.520±0.227 b  | 2.454±0.342 b  | 1.951-3.553 |
|                 | GS11 | 74.2±5.2 a                | 69.7±6.3 ab    | 72.1±5.0 ab    | 51.3±6.0 d     | 62.7±3.9 c      | 64.1±6.0 bc     | 50.7-81.5   |                          | GS11 | 3.646±0.199 a  | 2.860±0.186 b  | 3.100±0.228 b  | 2.544±0.228 c  | 3.095±0.178 b  | 2.890±0.350 b  | 2.297-4.033 |

<sup>a</sup> Average ± standard deviation.

<sup>b</sup> The lowercase letter indicates a significant difference at the 0.05 probability level based on Duncan-test among the different materials of the same trait.

**Supplementary Table S2.** ANOVA of trait performance and broad-sense heritabilities ( $h^2$ ) of 20 plant architecture and yield related traits in the HJ-DH population.

| Trait       | Variation       | df   | MS         | F value | P value | $h^2$ (%)    | Trait        | Variation       | df   | MS          | F value | P value | $h^2$ (%)    |
|-------------|-----------------|------|------------|---------|---------|--------------|--------------|-----------------|------|-------------|---------|---------|--------------|
| <b>PH</b>   | Genotype (G)    | 178  | 929.446    | 10.62   | <.0001  | <b>83.3%</b> | <b>MISN</b>  | Genotype (G)    | 178  | 537.708     | 13.19   | <.0001  | <b>82.8%</b> |
|             | Environment (E) | 3    | 213480.942 | 2348.50 | <.0001  |              |              | Environment (E) | 3    | 91004.178   | 2231.76 | <.0001  |              |
|             | G×E             | 567  | 155.344    | 1.77    | <.0001  |              |              | G×E             | 567  | 92.654      | 2.27    | <.0001  |              |
|             | Error           | 1479 | 87.546     |         |         |              |              | Error           | 1478 | 40.777      |         |         |              |
| <b>MIL</b>  | G               | 178  | 255.134    | 9.84    | <.0001  | <b>68.9%</b> | <b>BSN</b>   | G               | 178  | 18363.725   | 3.98    | <.0001  | <b>67.1%</b> |
|             | E               | 3    | 17432.330  | 672.34  | <.0001  |              |              | E               | 3    | 918768.926  | 199.06  | <.0001  |              |
|             | G×E             | 567  | 79.280     | 3.06    | <.0001  |              |              | G×E             | 567  | 6047.587    | 1.31    | <.0001  |              |
|             | Error           | 1478 | 25.928     |         |         |              |              | Error           | 1478 | 4615.620    |         |         |              |
| <b>BH</b>   | G               | 178  | 1005.654   | 13.35   | <.0001  | <b>78.4%</b> | <b>PSN</b>   | G               | 178  | 22126.841   | 4.42    | <.0001  | <b>69.9%</b> |
|             | E               | 3    | 60272.801  | 799.83  | <.0001  |              |              | E               | 3    | 1408281.213 | 281.39  | <.0001  |              |
|             | G×E             | 567  | 217.494    | 2.89    | <.0001  |              |              | G×E             | 567  | 6651.767    | 1.33    | <.0001  |              |
|             | Error           | 1477 | 75.357     |         |         |              |              | Error           | 1478 | 5004.760    |         |         |              |
| <b>BS</b>   | G               | 178  | 225.517    | 5.90    | <.0001  | <b>72.9%</b> | <b>MISNP</b> | G               | 178  | 0.005       | 3.96    | <.0001  | <b>60.0%</b> |
|             | E               | 3    | 39458.050  | 1032.43 | <.0001  |              |              | E               | 3    | 0.502       | 341.22  | <.0001  |              |
|             | G×E             | 567  | 61.030     | 1.60    | <.0001  |              |              | G×E             | 567  | 0.002       | 1.62    | <.0001  |              |
|             | Error           | 1475 | 38.219     |         |         |              |              | Error           | 1478 | 0.001       |         |         |              |
| <b>MILP</b> | G               | 178  | 0.018      | 14.05   | <.0001  | <b>72.2%</b> | <b>MIY</b>   | G               | 178  | 3.132       | 13.48   | <.0001  | <b>82.2%</b> |
|             | E               | 3    | 1.489      | 1130.74 | <.0001  |              |              | E               | 3    | 238.522     | 1026.12 | <.0001  |              |
|             | G×E             | 567  | 0.005      | 4.03    | <.0001  |              |              | G×E             | 567  | 0.559       | 2.41    | <.0001  |              |
|             | Error           | 1477 | 0.001      |         |         |              |              | Error           | 1495 | 0.232       |         |         |              |
| <b>BSP</b>  | G               | 178  | 0.008      | 5.92    | <.0001  | <b>74.8%</b> | <b>BY</b>    | G               | 178  | 31.438      | 3.59    | <.0001  | <b>58.4%</b> |

|            |       |      |             |         |        |              |             |       |         |            |         |        |              |
|------------|-------|------|-------------|---------|--------|--------------|-------------|-------|---------|------------|---------|--------|--------------|
|            | E     | 3    | 0.342       | 259.11  | <.0001 |              | E           | 3     | 589.725 | 67.39      | <.0001  |        |              |
|            | G×E   | 567  | 0.002       | 1.49    | <.0001 |              | G×E         | 567   | 13.086  | 1.50       | <.0001  |        |              |
|            | Error | 1475 | 0.001       |         |        |              | Error       | 1490  | 8.751   |            |         |        |              |
| <b>BHP</b> | G     | 178  | 0.024       | 9.67    | <.0001 | <b>74.1%</b> | <b>PY</b>   | G     | 178     | 45.005     | 4.30    | <.0001 | <b>64.6%</b> |
|            | E     | 3    | 1.329       | 540.55  | <.0001 |              |             | E     | 3       | 1291.805   | 123.41  | <.0001 |              |
|            | G×E   | 567  | 0.006       | 2.50    | <.0001 |              |             | G×E   | 567     | 15.920     | 1.52    | <.0001 |              |
|            | Error | 1477 | 0.002       |         |        |              |             | Error | 1489    | 10.468     |         |        |              |
| <b>BN</b>  | G     | 178  | 6.959       | 9.16    | <.0001 | <b>74.8%</b> | <b>MIYP</b> | G     | 178     | 0.008      | 3.87    | <.0001 | <b>50.0%</b> |
|            | E     | 3    | 771.946     | 1015.69 | <.0001 |              |             | E     | 3       | 0.557      | 253.50  | <.0001 |              |
|            | G×E   | 567  | 1.752       | 2.31    | <.0001 |              |             | G×E   | 567     | 0.004      | 1.93    | <.0001 |              |
|            | Error | 1479 | 0.760       |         |        |              |             | Error | 1489    | 0.002      |         |        |              |
| <b>BTL</b> | G     | 178  | 30556.480   | 4.46    | <.0001 | <b>70.4%</b> | <b>SSN</b>  | G     | 178     | 9539.147   | 26.53   | <.0001 | <b>87.0%</b> |
|            | E     | 3    | 7361816.550 | 1073.38 | <.0001 |              |             | E     | 3       | 239600.156 | 666.25  | <.0001 |              |
|            | G×E   | 567  | 9051.460    | 1.32    | <.0001 |              |             | G×E   | 567     | 1244.492   | 3.46    | <.0001 |              |
|            | Error | 1478 | 6858.570    |         |        |              |             | Error | 1476    | 359.623    |         |        |              |
| <b>BAL</b> | G     | 178  | 324.098     | 8.40    | <.0001 | <b>75.4%</b> | <b>TSW</b>  | G     | 178     | 1.298      | 37.12   | <.0001 | <b>92.8%</b> |
|            | E     | 3    | 34553.130   | 900.69  | <.0001 |              |             | E     | 3       | 38.257     | 1094.55 | <.0001 |              |
|            | G×E   | 567  | 79.691      | 2.08    | <.0001 |              |             | G×E   | 567     | 0.093      | 2.66    | <.0001 |              |
|            | Error | 1478 | 38.363      |         |        |              |             | Error | 1499    | 0.035      |         |        |              |

**Supplementary Table S3.** Correlation coefficients of 20 traits in winter-type (below diagonal) and spring-type (above diagonal) rapeseed area, respectively.

| <b>r</b>    | <b>PH</b> | <b>BH</b> | <b>MIL</b> | <b>BS</b> | <b>BHP</b> | <b>MILP</b> | <b>BSP</b> | <b>BN</b> | <b>BTL</b> | <b>BAL</b> | <b>MISN</b> | <b>BSN</b> | <b>PSN</b> | <b>MISP</b> | <b>SSN</b> | <b>BY</b> | <b>PY</b> | <b>MIY</b> | <b>MIYP</b> | <b>TSW</b> |
|-------------|-----------|-----------|------------|-----------|------------|-------------|------------|-----------|------------|------------|-------------|------------|------------|-------------|------------|-----------|-----------|------------|-------------|------------|
| <b>PH</b>   |           | 0.807**   | -0.047     | 0.467**   | 0.655**    | -0.613**    | -0.015     | 0.522**   | 0.491**    | -0.071     | 0.162*      | 0.301**    | 0.308**    | -0.322**    | -0.079     | 0.506**   | 0.489**   | 0.159*     | -0.304**    | 0.051      |
| <b>BH</b>   | 0.536**   |           | -0.461**   | 0.263**   | 0.971**    | -0.849**    | -0.134     | 0.552**   | 0.210**    | -0.534**   | -0.088      | 0.124      | 0.108      | -0.248**    | 0.014      | 0.411**   | 0.381**   | 0.059      | -0.272**    | -0.016     |
| <b>MIL</b>  | 0.362**   | -0.461**  |            | -0.409**  | -0.562**   | 0.769**     | -0.452**   | -0.601**  | -0.148*    | 0.710**    | 0.570**     | 0.042      | 0.114      | 0.311**     | -0.225**   | -0.235**  | -0.151*   | 0.255**    | 0.383**     | 0.015      |
| <b>BS</b>   | 0.727**   | -0.014    | 0.381**    |           | 0.152*     | -0.604**    | 0.872**    | 0.770**   | 0.763**    | -0.055     | -0.288**    | 0.282**    | 0.232**    | -0.569**    | 0.141*     | 0.508**   | 0.425**   | -0.129     | -0.567**    | 0.068      |
| <b>BHP</b>  | 0.057     | 0.870**   | -0.751**   | -0.434**  |            | -0.852**    | -0.180*    | 0.506**   | 0.081      | -0.656**   | -0.151*     | 0.043      | 0.021      | -0.177*     | 0.047      | 0.329**   | 0.300**   | 0.026      | -0.217**    | -0.051     |
| <b>MILP</b> | -0.369**  | -0.848**  | 0.726**    | -0.150**  | -0.795**   |             | -0.358**   | -0.791**  | -0.389**   | 0.642**    | 0.360**     | -0.126     | -0.074     | 0.420**     | -0.146*    | -0.474**  | -0.399**  | 0.105      | 0.472**     | 0.006      |
| <b>BSP</b>  | 0.374**   | -0.358**  | 0.317**    | 0.905**   | -0.640**   | 0.043       |            | 0.584**   | 0.594**    | -0.024     | -0.424**    | 0.158*     | 0.096      | -0.483**    | 0.194**    | 0.306**   | 0.216**   | -0.247**   | -0.504**    | 0.083      |
| <b>BN</b>   | 0.631**   | 0.355**   | -0.074     | 0.724**   | 0.049      | -0.525**    | 0.586**    |           | 0.778**    | -0.389**   | -0.314**    | 0.371**    | 0.315**    | -0.686**    | 0.140*     | 0.635**   | 0.539**   | -0.123     | -0.642**    | -0.012     |
| <b>BTL</b>  | 0.713**   | -0.049    | 0.540**    | 0.871**   | -0.469**   | 0.021       | 0.746**    | 0.751**   |            | 0.269**    | -0.141*     | 0.518**    | 0.477**    | -0.751**    | 0.026      | 0.631**   | 0.537**   | -0.118     | -0.675**    | 0.152*     |
| <b>BAL</b>  | 0.420**   | -0.445**  | 0.896**    | 0.563**   | -0.770**   | 0.589**     | 0.523**    | 0.091*    | 0.716**    |            | 0.269**     | 0.189**    | 0.215**    | -0.068      | -0.182**   | -0.048    | -0.038    | 0.018      | -0.016      | 0.230**    |
| <b>MISN</b> | 0.054     | 0.210**   | 0.010      | -0.214**  | 0.242**    | -0.054      | -0.331**   | -0.028    | -0.090*    | -0.151**   |             | 0.286**    | 0.402**    | 0.321**     | -0.358**   | -0.066    | 0.013     | 0.311**    | 0.323**     | -0.121     |
| <b>BSN</b>  | 0.406**   | 0.165**   | 0.117**    | 0.400**   | -0.041     | -0.175**    | 0.290**    | 0.597**   | 0.589**    | 0.265**    | 0.381**     |            | 0.992**    | -0.676**    | -0.345**   | 0.437**   | 0.369**   | -0.091     | -0.450**    | 0.110      |
| <b>PSN</b>  | 0.388**   | 0.181**   | 0.112*     | 0.348**   | -0.008     | -0.170**    | 0.229**    | 0.558**   | 0.543**    | 0.230**    | 0.489**     | 0.993**    |            | -0.605**    | -0.375**   | 0.409**   | 0.355**   | -0.047     | -0.389**    | 0.090      |
| <b>MISP</b> | -0.545**  | -0.094*   | -0.245**   | -0.637**  | 0.221**    | 0.139**     | -0.540**   | -0.681**  | -0.768**   | -0.482**   | 0.076       | 0.826**    | 0.769**    |             | 0.139      | -0.620**  | -0.493**  | 0.266**    | 0.798**     | -0.188**   |
| <b>SSN</b>  | 0.560**   | 0.309**   | 0.137**    | 0.456**   | 0.030      | -0.264**    | 0.285**    | 0.326**   | 0.344**    | 0.201**    | -0.303**    | -0.109*    | 0.144**    | -0.187**    |            | 0.269**   | 0.348**   | 0.462**    | 0.169*      | -0.480**   |
| <b>BY</b>   | 0.381**   | 0.185**   | 0.057      | 0.383**   | -0.003     | -0.222**    | 0.286**    | 0.504**   | 0.468**    | 0.189**    | 0.181**     | 0.741**    | 0.722**    | -0.671**    | 0.183**    |           | 0.976**   | 0.350**    | -0.552**    | 0.022      |
| <b>PY</b>   | 0.430**   | 0.223**   | 0.098*     | 0.378**   | 0.019      | -0.223**    | 0.251**    | 0.453**   | 0.434**    | 0.186**    | 0.221**     | 0.643**    | 0.634**    | -0.581**    | 0.297**    | 0.974**   |           | 0.545**    | -0.369**    | -0.073     |
| <b>MIY</b>  | 0.379**   | 0.249**   | 0.188**    | 0.161**   | 0.094*     | -0.116**    | -0.008     | 0.028     | 0.078      | 0.072      | 0.250**     | -0.054     | -0.020     | 0.058       | 0.560**    | 0.366**   | 0.566**   |            | 0.538**     | -0.398**   |
| <b>MIYP</b> | -0.293**  | -0.015    | -0.105*    | -0.421**  | 0.171**    | 0.091*      | -0.396**   | -0.550**  | -0.580**   | -0.333**   | 0.007       | 0.786**    | 0.740**    | 0.857**     | 0.083      | -0.692**  | -0.542**  | 0.294**    |             | -0.409**   |
| <b>TSW</b>  | -0.485**  | -0.349**  | -0.069     | -0.327**  | -0.128**   | 0.280**     | -0.144**   | -0.295**  | -0.288**   | -0.132**   | -0.065      | -0.090*    | -0.091*    | 0.252**     | -0.634**   | -0.006    | -0.066    | -0.250**   | 0.009       |            |

\* and \*\* indicate a significant difference at the 0.05 probability level and 0.01 probability level, respectively.

**Supplementary Table S4.** Detailed information of identified QTLs.

| <b>ID</b> | <b>Env.</b> | <b>Trait</b> | <b>LG</b> | <b>Peak</b> | <b>LOD</b> | <b>A</b> | <b>R<sup>2</sup></b> | <b>Interval</b> |
|-----------|-------------|--------------|-----------|-------------|------------|----------|----------------------|-----------------|
| 1         | WH09        | PH           | BnA01     | 0.0         | 5.74       | -2.697   | 8.3%                 | 0-2.3           |
| 2         | WH09        | SSN          | BnA01     | 15.8        | 6.11       | 11.525   | 10.0%                | 14.1-16.8       |
| 3         | WH09        | TSW          | BnA01     | 23.7        | 6.36       | -0.136   | 7.5%                 | 23.1-26.1       |
| 4         | WH09        | MIL          | BnA01     | 25.8        | 9.39       | -2.585   | 18.6%                | 25.6-26.9       |
| 5         | WH09        | BSP          | BnA01     | 124.7       | 3.69       | 0.011    | 6.5%                 | 116.8-127.7     |
| 6         | WH09        | TSW          | BnA01     | 125.7       | 4.04       | -0.128   | 6.1%                 | 121-127.7       |
| 7         | WH09        | BS           | BnA02     | 9.6         | 3.54       | -1.641   | 5.5%                 | 3.9-14.4        |
| 8         | WH09        | BTL          | BnA02     | 11.6        | 4.77       | -20.814  | 5.7%                 | 5.8-13.9        |
| 9         | WH09        | BN           | BnA02     | 11.7        | 6.47       | -0.296   | 6.7%                 | 7.6-13.9        |
| 10        | WH09        | BSN          | BnA02     | 11.7        | 4.90       | -19.697  | 7.2%                 | 8.1-14.2        |
| 11        | WH09        | MISNP        | BnA02     | 11.7        | 5.57       | 0.013    | 7.1%                 | 7.3-13.9        |
| 12        | WH09        | MIYP         | BnA02     | 11.7        | 3.55       | 0.013    | 5.0%                 | 8.6-14.6        |
| 13        | WH09        | SSN          | BnA02     | 12.7        | 5.58       | 10.478   | 9.4%                 | 7.8-15.4        |
| 14        | WH09        | PSN          | BnA02     | 16.8        | 5.52       | -24.574  | 8.4%                 | 15.9-17.4       |
| 15        | WH09        | BY           | BnA02     | 21.7        | 5.52       | -1.062   | 8.8%                 | 21.5-22         |
| 16        | WH09        | PY           | BnA02     | 21.7        | 12.34      | -1.584   | 21.9%                | 21-22.3         |
| 17        | WH09        | MILP         | BnA02     | 26.5        | 12.95      | 0.017    | 18.3%                | 25.6-26.8       |
| 18        | WH09        | BHP          | BnA02     | 27.4        | 4.08       | -0.014   | 5.6%                 | 24.9-28.7       |
| 19        | WH09        | BSP          | BnA02     | 56.7        | 8.96       | -0.016   | 13.1%                | 56.3-57.3       |
| 20        | WH09        | BHP          | BnA02     | 71.7        | 6.41       | 0.018    | 9.0%                 | 71.5-72.7       |
| 21        | WH09        | PY           | BnA03     | 20.1        | 3.56       | 0.946    | 5.6%                 | 18.7-25.3       |
| 22        | WH09        | TSW          | BnA03     | 43.4        | 9.34       | 0.162    | 11.9%                | 42-45.4         |
| 23        | WH09        | TSW          | BnA03     | 124.7       | 3.69       | 0.130    | 6.6%                 | 123.3-130.8     |
| 24        | WH09        | BH           | BnA04     | 40.5        | 4.62       | -2.530   | 7.6%                 | 38.7-42.6       |
| 25        | WH09        | MIYP         | BnA05     | 59.5        | 6.31       | 0.019    | 10.1%                | 58.2-60.8       |
| 26        | WH09        | MILP         | BnA05     | 62.5        | 3.44       | -0.009   | 4.3%                 | 60.5-62.6       |
| 27        | WH09        | MIY          | BnA06     | 0.3         | 8.78       | 0.260    | 14.1%                | 0-1.3           |
| 28        | WH09        | SSN          | BnA06     | 58.7        | 7.21       | 11.800   | 12.0%                | 57-59.8         |
| 29        | WH09        | PH           | BnA07     | 81.5        | 6.20       | -2.839   | 9.0%                 | 80.9-83.4       |
| 30        | WH09        | BS           | BnA07     | 93.1        | 7.96       | -2.467   | 11.6%                | 92.5-94.2       |
| 31        | WH09        | TSW          | BnA07     | 112.0       | 3.89       | -0.108   | 4.6%                 | 111.9-115       |
| 32        | WH09        | TSW          | BnA07     | 121.9       | 5.28       | -0.121   | 6.2%                 | 121.5-122.2     |

|    |      |       |       |       |       |         |       |             |
|----|------|-------|-------|-------|-------|---------|-------|-------------|
| 33 | WH09 | PH    | BnA08 | 2.0   | 6.63  | -2.969  | 10.6% | 0-5         |
| 34 | WH09 | MISNP | BnA08 | 15.1  | 9.80  | 0.020   | 13.2% | 14.4-16.3   |
| 35 | WH09 | BY    | BnA08 | 15.1  | 4.33  | -0.997  | 6.8%  | 13.5-16.4   |
| 36 | WH09 | MIYP  | BnA08 | 16.0  | 8.98  | 0.025   | 14.6% | 14.9-16.9   |
| 37 | WH09 | BTL   | BnA08 | 29.9  | 8.94  | -31.692 | 11.3% | 29.4-30.5   |
| 38 | WH09 | BSN   | BnA08 | 30.2  | 9.99  | -32.715 | 15.8% | 29.3-30.5   |
| 39 | WH09 | PSN   | BnA08 | 30.2  | 12.41 | -40.484 | 23.7% | 29.7-31     |
| 40 | WH09 | BN    | BnA08 | 34.3  | 7.74  | -0.381  | 8.6%  | 32.9-36.5   |
| 41 | WH09 | BSP   | BnA08 | 65.2  | 3.45  | -0.010  | 5.2%  | 59-68.5     |
| 42 | WH09 | BSP   | BnA09 | 26.7  | 11.16 | -0.018  | 19.0% | 23.8-27.7   |
| 43 | WH09 | MISN  | BnA09 | 47.0  | 5.69  | 2.499   | 6.1%  | 43.3-50.8   |
| 44 | WH09 | MIY   | BnA09 | 76.8  | 5.35  | 0.195   | 8.2%  | 75.3-79.4   |
| 45 | WH09 | MIL   | BnA09 | 78.8  | 4.25  | 1.526   | 7.3%  | 78.5-81.6   |
| 46 | WH09 | MILP  | BnA09 | 81.8  | 8.94  | 0.014   | 13.1% | 79.5-83.4   |
| 47 | WH09 | BN    | BnC01 | 3.7   | 4.98  | -0.281  | 4.9%  | 2.8-5.6     |
| 48 | WH09 | BH    | BnC02 | 9.3   | 3.89  | 4.042   | 12.0% | 5.7-14      |
| 49 | WH09 | BN    | BnC02 | 35.1  | 5.88  | 0.298   | 6.0%  | 34.5-36.1   |
| 50 | WH09 | BSP   | BnC02 | 63.0  | 3.73  | 0.013   | 7.5%  | 55.3-70.9   |
| 51 | WH09 | BAL   | BnC03 | 38.2  | 5.24  | -1.727  | 8.0%  | 27.8-43.5   |
| 52 | WH09 | BTL   | BnC03 | 93.1  | 6.31  | -24.172 | 7.7%  | 92.5-98.8   |
| 53 | WH09 | BS    | BnC03 | 102.6 | 5.16  | -1.870  | 7.0%  | 100.3-102.9 |
| 54 | WH09 | BH    | BnC04 | 11.5  | 6.42  | -3.187  | 10.2% | 10.7-12.1   |
| 55 | WH09 | PH    | BnC04 | 65.4  | 8.15  | 3.396   | 12.1% | 64.2-67.4   |
| 56 | WH09 | BY    | BnC04 | 89.7  | 5.72  | 1.109   | 9.2%  | 89.3-90.8   |
| 57 | WH09 | PY    | BnC04 | 89.7  | 7.62  | 1.398   | 12.7% | 89.4-90.8   |
| 58 | WH09 | MIY   | BnC04 | 102.4 | 9.64  | 0.307   | 19.9% | 98.2-104.4  |
| 59 | WH09 | BH    | BnC04 | 105.1 | 5.93  | 2.664   | 8.2%  | 104.7-108.8 |
| 60 | WH09 | BHP   | BnC04 | 116.1 | 4.80  | 0.015   | 7.5%  | 115.1-123   |
| 61 | WH09 | BSP   | BnC04 | 140.7 | 4.39  | -0.011  | 6.0%  | 139.2-141.6 |
| 62 | WH09 | BAL   | BnC05 | 56.5  | 4.02  | -1.558  | 6.5%  | 48.0-60.1   |
| 63 | WH09 | BY    | BnC05 | 59.7  | 5.14  | -0.993  | 9.2%  | 58.5-61.8   |
| 64 | WH09 | PY    | BnC05 | 59.7  | 5.95  | -1.245  | 11.0% | 58.5-61.6   |
| 65 | WH09 | TSW   | BnC05 | 101.5 | 4.02  | 0.096   | 4.2%  | 96.7-102.8  |
| 66 | WH09 | MISN  | BnC06 | 2.9   | 5.02  | 2.546   | 5.3%  | 1.9-3.0     |



|     |      |       |       |       |       |         |       |             |
|-----|------|-------|-------|-------|-------|---------|-------|-------------|
| 67  | WH09 | MIL   | BnC06 | 14.8  | 7.30  | 2.093   | 14.2% | 11.4-19.0   |
| 68  | WH09 | TSW   | BnC06 | 39.5  | 15.08 | 0.166   | 13.6% | 33.2-39.8   |
| 69  | WH09 | BAL   | BnC06 | 45.5  | 10.31 | 2.671   | 16.9% | 43.7-46.9   |
| 70  | WH09 | BH    | BnC06 | 45.5  | 14.49 | -4.487  | 25.7% | 44.4-46.2   |
| 71  | WH09 | BHP   | BnC06 | 45.5  | 9.56  | -0.022  | 14.0% | 41.6-46.3   |
| 72  | WH09 | MILP  | BnC06 | 49.1  | 14.65 | 0.018   | 20.8% | 48.8-49.1   |
| 73  | WH09 | TSW   | BnC07 | 14.3  | 3.69  | -0.109  | 4.3%  | 13.4-17.2   |
| 74  | WH09 | BTL   | BnC07 | 19.1  | 3.47  | -19.876 | 4.3%  | 16.6-20.9   |
| 75  | WH09 | TSW   | BnC07 | 63.4  | 5.04  | 0.121   | 6.6%  | 60.2-67.7   |
| 76  | WH09 | BN    | BnC08 | 59.9  | 5.03  | -0.269  | 5.1%  | 58.5-60.6   |
| 77  | WH09 | BSN   | BnC08 | 59.9  | 4.93  | -21.122 | 7.3%  | 56.1-63.8   |
| 78  | WH09 | PSN   | BnC08 | 59.9  | 6.00  | -28.271 | 10.5% | 56.1-62.8   |
| 79  | WH09 | MIYP  | BnC08 | 61.8  | 9.46  | 0.025   | 16.8% | 60.5-63.8   |
| 80  | WH09 | MISNP | BnC08 | 72.9  | 7.58  | 0.018   | 11.6% | 69.9-75     |
| 81  | WH09 | MISN  | BnC08 | 73.9  | 5.39  | -2.936  | 7.0%  | 71.6-76.7   |
| 82  | WH09 | BSN   | BnC08 | 127.7 | 4.24  | -18.707 | 6.2%  | 126.8-129.2 |
| 83  | WH09 | PSN   | BnC08 | 127.7 | 3.72  | -19.406 | 6.3%  | 123.6-129.7 |
| 84  | WH09 | MISN  | BnC08 | 128.7 | 14.66 | -5.028  | 18.7% | 127.7-129.9 |
| 85  | WH09 | MIYP  | BnC09 | 97.9  | 7.18  | 0.039   | 12.0% | 96.3-99.2   |
| 86  | WH10 | MIY   | BnA01 | 15.8  | 9.52  | 0.268   | 13.6% | 15.5-17     |
| 87  | WH10 | TSW   | BnA01 | 19.6  | 8.77  | -0.144  | 10.8% | 19.2-20.7   |
| 88  | WH10 | SSN   | BnA01 | 26.8  | 11.53 | 18.219  | 25.1% | 25.2-27.8   |
| 89  | WH10 | MILP  | BnA01 | 29.3  | 5.68  | -0.020  | 6.3%  | 28.6-30.4   |
| 90  | WH10 | MIL   | BnA01 | 49.5  | 4.11  | -1.962  | 5.6%  | 49.5-51.8   |
| 91  | WH10 | BAL   | BnA01 | 57.1  | 4.18  | -2.131  | 3.7%  | 53.7-60.4   |
| 92  | WH10 | BH    | BnA02 | 18.6  | 6.55  | -5.105  | 6.7%  | 18.2-18.9   |
| 93  | WH10 | BHP   | BnA02 | 18.6  | 8.00  | -0.025  | 8.3%  | 18.2-18.9   |
| 94  | WH10 | MISN  | BnA02 | 19.8  | 6.51  | -3.081  | 11.5% | 17.3-22     |
| 95  | WH10 | BAL   | BnA02 | 22.5  | 18.95 | 4.989   | 20.9% | 22-27.4     |
| 96  | WH10 | BN    | BnA02 | 22.8  | 6.03  | -0.399  | 6.5%  | 22.4-25.4   |
| 97  | WH10 | MIL   | BnA02 | 22.8  | 5.21  | 2.209   | 6.8%  | 22.4-24.2   |
| 98  | WH10 | BH    | BnA02 | 53.9  | 8.32  | 5.790   | 8.7%  | 52.8-55.2   |
| 99  | WH10 | BHP   | BnA02 | 53.9  | 7.88  | 0.025   | 8.2%  | 52.6-54.9   |
| 100 | WH10 | BAL   | BnA02 | 63.6  | 9.61  | -3.562  | 9.1%  | 63.3-66.1   |

|     |      |      |       |       |       |         |       |             |
|-----|------|------|-------|-------|-------|---------|-------|-------------|
| 101 | WH10 | PY   | BnA03 | 13.5  | 3.77  | 0.715   | 5.4%  | 12-16.3     |
| 102 | WH10 | TSW  | BnA03 | 31.4  | 4.54  | 0.147   | 11.3% | 26.6-35.4   |
| 103 | WH10 | SSN  | BnA03 | 70.3  | 5.55  | -11.413 | 8.9%  | 68.2-72.3   |
| 104 | WH10 | MIL  | BnA03 | 71.4  | 4.37  | 1.999   | 5.0%  | 70.3-72.9   |
| 105 | WH10 | BSP  | BnA03 | 153.8 | 7.67  | -0.019  | 15.1% | 153.4-156.4 |
| 106 | WH10 | BTL  | BnA03 | 163.9 | 5.85  | -27.011 | 9.9%  | 163-165     |
| 107 | WH10 | MIY  | BnA03 | 176.8 | 4.88  | 0.178   | 6.6%  | 174.9-178.5 |
| 108 | WH10 | BSP  | BnA03 | 183.9 | 4.32  | 0.011   | 8.6%  | 182-186.2   |
| 109 | WH10 | BH   | BnA04 | 41.9  | 7.34  | -5.077  | 8.4%  | 41.2-44     |
| 110 | WH10 | BHP  | BnA04 | 42.9  | 9.88  | -0.027  | 11.6% | 41.1-44.3   |
| 111 | WH10 | PY   | BnA04 | 49.5  | 5.57  | -0.875  | 9.7%  | 47.2-50.8   |
| 112 | WH10 | BY   | BnA04 | 55.0  | 3.50  | -0.592  | 5.3%  | 50.8-57.9   |
| 113 | WH10 | MIY  | BnA04 | 57.2  | 7.59  | -0.218  | 10.7% | 56.4-62.8   |
| 114 | WH10 | PY   | BnA05 | 20.4  | 9.38  | 1.082   | 14.4% | 19.7-22.5   |
| 115 | WH10 | MIL  | BnA05 | 45.7  | 4.09  | -1.939  | 4.7%  | 44.5-47.6   |
| 116 | WH10 | MIL  | BnA06 | 8.2   | 3.28  | 1.638   | 3.8%  | 7.3-9.9     |
| 117 | WH10 | PSN  | BnA06 | 63.9  | 4.27  | -16.840 | 6.7%  | 61.3-65.2   |
| 118 | WH10 | BSN  | BnA06 | 64.2  | 4.01  | -15.248 | 6.7%  | 61.8-65.2   |
| 119 | WH10 | MIL  | BnA07 | 40.9  | 4.92  | -2.278  | 5.6%  | 39.6-43.1   |
| 120 | WH10 | MIYP | BnA07 | 98.6  | 4.89  | 0.011   | 9.6%  | 97.9-98.9   |
| 121 | WH10 | BAL  | BnA08 | 1.0   | 8.03  | -3.271  | 8.4%  | 0-3.4       |
| 122 | WH10 | BSN  | BnA08 | 15.1  | 7.95  | -24.964 | 13.9% | 13.7-17.3   |
| 123 | WH10 | PSN  | BnA08 | 16.6  | 11.54 | -38.426 | 19.7% | 16-17.6     |
| 124 | WH10 | BS   | BnA08 | 37.3  | 4.46  | -2.060  | 10.2% | 33.3-41.9   |
| 125 | WH10 | BTL  | BnA08 | 37.8  | 9.23  | -33.875 | 15.9% | 36.3-40.6   |
| 126 | WH10 | PH   | BnA08 | 43.3  | 5.23  | -4.414  | 7.6%  | 43.1-46.5   |
| 127 | WH10 | PY   | BnA09 | 51.7  | 3.91  | 0.738   | 6.5%  | 48.6-52.5   |
| 128 | WH10 | SSN  | BnA09 | 52.5  | 4.05  | -9.538  | 7.1%  | 49-58.5     |
| 129 | WH10 | TSW  | BnA09 | 53.1  | 6.26  | 0.113   | 7.5%  | 52.8-55.5   |
| 130 | WH10 | MIL  | BnA09 | 59.4  | 6.10  | 2.387   | 8.0%  | 56.7-62.4   |
| 131 | WH10 | MISN | BnA09 | 62.4  | 7.75  | 2.962   | 11.5% | 61.1-63.1   |
| 132 | WH10 | MILP | BnA09 | 65.0  | 5.95  | 0.021   | 6.6%  | 64.4-67.3   |
| 133 | WH10 | MIL  | BnA10 | 39.1  | 4.92  | -2.130  | 5.6%  | 34.1-42.4   |
| 134 | WH10 | BS   | BnA10 | 45.8  | 3.84  | 2.069   | 7.4%  | 43.7-47.1   |

|     |      |       |       |       |       |        |       |             |
|-----|------|-------|-------|-------|-------|--------|-------|-------------|
| 135 | WH10 | SSN   | BnA10 | 45.8  | 6.96  | 13.174 | 10.9% | 45.2-56.3   |
| 136 | WH10 | PH    | BnA10 | 46.8  | 3.57  | 4.109  | 5.2%  | 45.2-48.2   |
| 137 | WH10 | MILP  | BnA10 | 47.2  | 4.01  | -0.018 | 4.4%  | 46.2-48.5   |
| 138 | WH10 | BY    | BnA10 | 49.9  | 5.08  | 0.798  | 8.8%  | 47.8-53.1   |
| 139 | WH10 | PY    | BnA10 | 49.9  | 4.39  | 0.918  | 8.6%  | 47.6-53.9   |
| 140 | WH10 | MISNP | BnA10 | 56.2  | 3.78  | -0.009 | 6.9%  | 55.2-57     |
| 141 | WH10 | TSW   | BnC01 | 0.0   | 8.58  | -0.135 | 10.6% | 0-1.7       |
| 142 | WH10 | MISN  | BnC01 | 53.7  | 4.72  | 2.320  | 7.2%  | 51.9-55.5   |
| 143 | WH10 | PY    | BnC02 | 2.0   | 4.33  | 1.066  | 5.5%  | 1-7.3       |
| 144 | WH10 | MIY   | BnC02 | 7.3   | 6.12  | 0.328  | 12.2% | 2.3-11.8    |
| 145 | WH10 | MISN  | BnC02 | 8.3   | 4.40  | 4.222  | 11.3% | 4.7-12.5    |
| 146 | WH10 | BN    | BnC02 | 42.8  | 9.01  | 0.478  | 10.1% | 42.2-43.6   |
| 147 | WH10 | MISN  | BnC02 | 55.5  | 3.51  | 2.153  | 5.0%  | 53.1-62.4   |
| 148 | WH10 | PY    | BnC02 | 97.2  | 3.23  | -0.586 | 4.6%  | 97.2-99.1   |
| 149 | WH10 | MIYP  | BnC03 | 77.8  | 3.54  | 0.013  | 7.5%  | 74.5-79.6   |
| 150 | WH10 | MIY   | BnC03 | 85.1  | 3.57  | 0.148  | 4.8%  | 81.5-88.6   |
| 151 | WH10 | SSN   | BnC03 | 102.9 | 4.57  | 9.856  | 8.2%  | 101.7-103.4 |
| 152 | WH10 | BH    | BnC04 | 18.3  | 5.79  | -4.998 | 7.1%  | 18.2-19.3   |
| 153 | WH10 | PH    | BnC04 | 18.3  | 4.87  | -4.692 | 7.9%  | 17.5-19.3   |
| 154 | WH10 | BHP   | BnC04 | 19.3  | 4.29  | -0.019 | 5.0%  | 18.2-19.9   |
| 155 | WH10 | BY    | BnC04 | 59.3  | 4.97  | 0.789  | 8.3%  | 58-60.3     |
| 156 | WH10 | MIY   | BnC04 | 69.4  | 3.65  | 0.210  | 5.6%  | 66.5-74.6   |
| 157 | WH10 | MISNP | BnC04 | 106.1 | 6.31  | -0.009 | 12.5% | 102.7-110   |
| 158 | WH10 | PY    | BnC04 | 109.9 | 3.68  | 0.670  | 6.1%  | 105.6-118.9 |
| 159 | WH10 | BHP   | BnC04 | 120.0 | 3.47  | 0.015  | 3.5%  | 113.3-123.6 |
| 160 | WH10 | MILP  | BnC04 | 122.0 | 3.95  | -0.018 | 4.7%  | 119-124.7   |
| 161 | WH10 | MILP  | BnC04 | 147.3 | 3.77  | 0.017  | 4.1%  | 145.9-148.8 |
| 162 | WH10 | MISNP | BnC05 | 95.5  | 3.81  | 0.007  | 6.9%  | 83.9-98.7   |
| 163 | WH10 | BN    | BnC05 | 116.2 | 4.16  | -0.319 | 4.4%  | 113.3-117.4 |
| 164 | WH10 | BS    | BnC06 | 39.5  | 6.15  | -2.262 | 13.6% | 39.2-40.4   |
| 165 | WH10 | BN    | BnC06 | 39.8  | 27.91 | -0.897 | 40.7% | 39.5-40.2   |
| 166 | WH10 | MIL   | BnC06 | 44.5  | 27.42 | 6.273  | 51.8% | 42.5-45.5   |
| 167 | WH10 | PH    | BnC06 | 45.5  | 10.48 | -6.558 | 16.0% | 43.9-47.2   |
| 168 | WH10 | BAL   | BnC06 | 54.8  | 24.08 | 5.474  | 28.5% | 53.3-55.4   |

|     |      |       |       |       |       |         |       |             |
|-----|------|-------|-------|-------|-------|---------|-------|-------------|
| 169 | WH10 | BH    | BnC06 | 54.8  | 22.78 | -9.588  | 29.0% | 53.0-55.8   |
| 170 | WH10 | BHP   | BnC06 | 54.8  | 22.34 | -0.042  | 28.3% | 52.9-55.2   |
| 171 | WH10 | MILP  | BnC06 | 54.8  | 20.76 | 0.045   | 28.1% | 53.8-55.1   |
| 172 | WH10 | TSW   | BnC06 | 54.8  | 6.12  | 0.129   | 7.3%  | 53.3-56.6   |
| 173 | WH10 | MISN  | BnC07 | 11.3  | 3.51  | 2.286   | 6.0%  | 8.8-16.6    |
| 174 | WH10 | BTL   | BnC07 | 68.6  | 4.88  | -23.018 | 7.5%  | 66.6-69.7   |
| 175 | WH10 | BSN   | BnC08 | 113.0 | 4.24  | -17.393 | 8.2%  | 107-116     |
| 176 | WH10 | PSN   | BnC08 | 114.0 | 7.29  | -23.909 | 13.0% | 110.2-115.9 |
| 177 | WH10 | MISN  | BnC08 | 117.9 | 19.08 | -5.622  | 34.2% | 115.9-120.3 |
| 178 | WH10 | SSN   | BnC08 | 118.4 | 3.48  | 8.791   | 6.4%  | 115.9-122.1 |
| 179 | WH10 | BY    | BnC08 | 137.6 | 7.10  | 0.801   | 11.4% | 136.6-138.5 |
| 180 | WH10 | PY    | BnC08 | 137.6 | 7.28  | 0.936   | 10.8% | 136.4-138.7 |
| 181 | WH10 | PH    | BnC09 | 88.2  | 4.54  | 5.068   | 7.5%  | 84.6-91     |
| 182 | WH10 | BAL   | BnC09 | 159.5 | 5.11  | 3.913   | 4.7%  | 157.7-161.8 |
| 183 | HG10 | PH    | BnA01 | 5.3   | 4.62  | -2.775  | 5.8%  | 4.3-7.5     |
| 184 | HG10 | MIL   | BnA01 | 9.1   | 7.06  | -1.954  | 11.0% | 7.9-11.1    |
| 185 | HG10 | MIYP  | BnA01 | 9.1   | 4.24  | 0.010   | 7.8%  | 7.9-10.1    |
| 186 | HG10 | BAL   | BnA01 | 9.1   | 3.96  | -2.009  | 7.2%  | 5.7-12.3    |
| 187 | HG10 | SSN   | BnA01 | 15.8  | 13.61 | 16.821  | 21.6% | 14.1-17.3   |
| 188 | HG10 | MIY   | BnA01 | 28.7  | 7.13  | 0.266   | 11.4% | 28.4-29.3   |
| 189 | HG10 | PY    | BnA01 | 29.6  | 4.36  | 0.977   | 8.1%  | 29.3-30.6   |
| 190 | HG10 | BSN   | BnA01 | 121.7 | 3.79  | 19.583  | 12.1% | 114.8-128.1 |
| 191 | HG10 | SSN   | BnA02 | 14.7  | 6.84  | 11.514  | 10.4% | 11.7-15.8   |
| 192 | HG10 | BHP   | BnA02 | 24.3  | 6.05  | -0.016  | 7.4%  | 22.5-25.6   |
| 193 | HG10 | BSN   | BnA02 | 31.4  | 3.41  | -16.264 | 6.9%  | 29.8-32.8   |
| 194 | HG10 | PH    | BnA02 | 57.2  | 6.72  | 3.543   | 8.8%  | 55.6-58.4   |
| 195 | HG10 | MISN  | BnA02 | 96.8  | 12.73 | 3.678   | 15.3% | 95.2-98.5   |
| 196 | HG10 | PSN   | BnA02 | 97.8  | 3.86  | 16.754  | 6.5%  | 94.5-98.8   |
| 197 | HG10 | TSW   | BnA03 | 43.7  | 13.38 | 0.151   | 15.0% | 42.6-47.2   |
| 198 | HG10 | BHP   | BnA03 | 71.4  | 5.63  | -0.017  | 6.8%  | 70.5-72.5   |
| 199 | HG10 | BY    | BnA03 | 92.1  | 4.76  | -0.839  | 9.1%  | 89.3-99.7   |
| 200 | HG10 | BSN   | BnA03 | 92.1  | 3.21  | -16.053 | 6.6%  | 89-101.2    |
| 201 | HG10 | MISNP | BnA03 | 92.1  | 3.28  | 0.009   | 6.2%  | 89-100.1    |
| 202 | HG10 | BAL   | BnA03 | 133.7 | 4.43  | 2.993   | 13.4% | 128.1-139.4 |

|     |      |      |       |       |       |         |       |             |
|-----|------|------|-------|-------|-------|---------|-------|-------------|
| 203 | HG10 | BN   | BnA03 | 163.0 | 4.00  | -0.237  | 5.8%  | 161.9-163.7 |
| 204 | HG10 | MISN | BnA03 | 175.0 | 6.19  | 2.583   | 6.9%  | 173.3-176.4 |
| 205 | HG10 | MISN | BnA04 | 22.2  | 3.51  | 2.372   | 6.0%  | 14.5-31.8   |
| 206 | HG10 | MILP | BnA04 | 40.5  | 3.95  | 0.009   | 4.8%  | 38.9-44.5   |
| 207 | HG10 | SSN  | BnA06 | 0.3   | 4.45  | 8.944   | 5.6%  | 0-1.9       |
| 208 | HG10 | BS   | BnA06 | 34.7  | 7.97  | 2.254   | 11.3% | 34.1-35.9   |
| 209 | HG10 | PH   | BnA07 | 8.3   | 6.76  | 4.231   | 11.8% | 6.8-12.1    |
| 210 | HG10 | BAL  | BnA07 | 85.1  | 3.87  | -1.821  | 7.0%  | 82.4-87.9   |
| 211 | HG10 | TSW  | BnA07 | 87.1  | 7.64  | -0.111  | 8.2%  | 86.7-88.9   |
| 212 | HG10 | TSW  | BnA07 | 96.2  | 8.95  | -0.126  | 9.4%  | 95.3-96.7   |
| 213 | HG10 | BTL  | BnA07 | 111.7 | 8.86  | -36.687 | 15.3% | 110.8-113.4 |
| 214 | HG10 | BSN  | BnA08 | 16.6  | 6.96  | -24.149 | 13.4% | 15.1-17.6   |
| 215 | HG10 | PH   | BnA08 | 30.2  | 14.05 | -5.324  | 19.2% | 29.9-33.4   |
| 216 | HG10 | PSN  | BnA08 | 30.2  | 6.35  | -22.355 | 10.5% | 26.3-33.3   |
| 217 | HG10 | BH   | BnA08 | 32.3  | 4.61  | -3.242  | 6.2%  | 31.7-39     |
| 218 | HG10 | BN   | BnA08 | 45.4  | 8.06  | -0.324  | 12.8% | 44.3-47.8   |
| 219 | HG10 | BS   | BnA09 | 19.7  | 6.37  | -2.025  | 8.9%  | 15.7-22.6   |
| 220 | HG10 | BSP  | BnA09 | 19.7  | 16.95 | -0.020  | 28.1% | 18.5-23     |
| 221 | HG10 | TSW  | BnA09 | 53.1  | 6.04  | 0.102   | 6.1%  | 52.6-54.6   |
| 222 | HG10 | SSN  | BnA09 | 56.1  | 4.72  | -10.041 | 7.5%  | 53.1-59.6   |
| 223 | HG10 | MIL  | BnA09 | 59.4  | 6.81  | 1.899   | 10.7% | 56.7-61.6   |
| 224 | HG10 | MISN | BnA09 | 60.4  | 6.13  | 2.537   | 7.0%  | 57.6-63.4   |
| 225 | HG10 | MILP | BnA09 | 62.4  | 3.43  | 0.009   | 3.6%  | 58-66.6     |
| 226 | HG10 | BN   | BnA10 | 43.1  | 6.29  | 0.304   | 9.4%  | 42.3-44     |
| 227 | HG10 | MIY  | BnA10 | 45.8  | 7.10  | 0.283   | 11.3% | 45.2-47.1   |
| 228 | HG10 | PH   | BnA10 | 46.8  | 8.09  | 4.275   | 10.5% | 46.6-48.2   |
| 229 | HG10 | BH   | BnA10 | 47.2  | 6.72  | 4.425   | 9.4%  | 46.4-48.7   |
| 230 | HG10 | MILP | BnA10 | 48.2  | 10.35 | -0.018  | 13.3% | 46.6-51     |
| 231 | HG10 | BHP  | BnA10 | 48.9  | 4.77  | 0.017   | 5.7%  | 46.7-50.5   |
| 232 | HG10 | BY   | BnA10 | 62.3  | 4.02  | 0.785   | 7.9%  | 57.8-63.3   |
| 233 | HG10 | SSN  | BnC01 | 0.0   | 5.57  | 9.688   | 6.9%  | 0-2.7       |
| 234 | HG10 | BN   | BnC01 | 4.6   | 8.10  | -0.341  | 12.3% | 3.7-5.6     |
| 235 | HG10 | MIYP | BnC01 | 71.4  | 5.22  | -0.010  | 9.6%  | 68.7-78.3   |
| 236 | HG10 | MISN | BnC02 | 14.3  | 4.84  | 3.350   | 7.3%  | 9.5-16.9    |

|     |      |       |       |       |       |         |       |             |
|-----|------|-------|-------|-------|-------|---------|-------|-------------|
| 237 | HG10 | BSP   | BnC02 | 51.3  | 3.51  | -0.009  | 4.9%  | 50-53.4     |
| 238 | HG10 | BTL   | BnC03 | 94.0  | 4.14  | -22.414 | 6.9%  | 93-96       |
| 239 | HG10 | BHP   | BnC03 | 95.0  | 6.74  | 0.018   | 9.0%  | 93.5-99     |
| 240 | HG10 | BH    | BnC03 | 103.4 | 5.59  | 3.446   | 7.7%  | 102.6-103.4 |
| 241 | HG10 | BS    | BnC04 | 2.9   | 5.45  | 1.861   | 7.5%  | 1-5.6       |
| 242 | HG10 | MISNP | BnC04 | 18.8  | 3.05  | 0.008   | 6.3%  | 14.6-22.9   |
| 243 | HG10 | MIYP  | BnC04 | 19.3  | 5.42  | 0.013   | 11.6% | 17.3-21.1   |
| 244 | HG10 | BSN   | BnC04 | 19.9  | 3.59  | -16.737 | 8.0%  | 17.1-22.1   |
| 245 | HG10 | MIY   | BnC04 | 54.6  | 6.91  | 0.271   | 11.0% | 54.1-55.9   |
| 246 | HG10 | BY    | BnC04 | 55.6  | 5.33  | 0.980   | 10.8% | 53.1-56     |
| 247 | HG10 | PY    | BnC04 | 55.6  | 8.14  | 1.502   | 16.6% | 55-56       |
| 248 | HG10 | BSN   | BnC05 | 9.8   | 4.47  | -17.785 | 8.9%  | 8.6-11.1    |
| 249 | HG10 | PSN   | BnC05 | 9.8   | 4.41  | -19.138 | 7.2%  | 9.2-10.7    |
| 250 | HG10 | MILP  | BnC05 | 98.5  | 3.81  | 0.011   | 4.9%  | 95.6-102.3  |
| 251 | HG10 | MIY   | BnC05 | 113.5 | 5.69  | 0.243   | 9.4%  | 111.2-118.0 |
| 252 | HG10 | SSN   | BnC06 | 5.5   | 4.50  | -8.875  | 6.3%  | 4.1-8.8     |
| 253 | HG10 | TSW   | BnC06 | 31.3  | 12.93 | 0.158   | 15.4% | 29.8-32.2   |
| 254 | HG10 | MIL   | BnC06 | 40.7  | 8.56  | 2.298   | 13.7% | 39.8-43.8   |
| 255 | HG10 | MILP  | BnC06 | 43.5  | 16.50 | 0.022   | 23.5% | 42.4-44.1   |
| 256 | HG10 | BH    | BnC06 | 45.5  | 8.07  | -4.618  | 11.2% | 43.4-47.3   |
| 257 | HG10 | BHP   | BnC06 | 45.5  | 6.96  | -0.019  | 8.2%  | 43.4-47.3   |
| 258 | HG10 | BAL   | BnC06 | 54.8  | 6.57  | 2.566   | 13.7% | 52.8-57.2   |
| 259 | HG10 | BH    | BnC07 | 17.6  | 3.87  | 3.426   | 5.5%  | 15.4-20.5   |
| 260 | HG10 | MIY   | BnC07 | 26.2  | 4.08  | 0.214   | 6.4%  | 25.1-28.5   |
| 261 | HG10 | TSW   | BnC07 | 75.8  | 3.78  | 0.071   | 3.4%  | 75.2-76.7   |
| 262 | HG10 | BHP   | BnC08 | 76.0  | 3.54  | -0.012  | 3.8%  | 70.6-76.8   |
| 263 | HG10 | BH    | BnC08 | 77.7  | 4.55  | -3.210  | 5.5%  | 76.8-78.9   |
| 264 | HG10 | SSN   | BnC08 | 126.4 | 7.55  | 12.459  | 11.2% | 125-127.5   |
| 265 | HG10 | MISN  | BnC08 | 132.0 | 13.95 | -3.939  | 17.5% | 130.4-133   |
| 266 | HG10 | BSN   | BnC08 | 133.0 | 6.74  | -19.515 | 12.1% | 129.9-134   |
| 267 | HG10 | PSN   | BnC08 | 133.0 | 9.07  | -24.876 | 15.7% | 131.1-134   |
| 268 | HG10 | MILP  | BnC08 | 135.0 | 3.77  | -0.009  | 4.4%  | 133.7-135.3 |
| 269 | HG10 | BSP   | BnC08 | 143.7 | 7.78  | 0.013   | 11.3% | 141.6-144.2 |
| 270 | HG10 | BSP   | BnC09 | 18.7  | 5.36  | 0.011   | 7.9%  | 16.3-20.3   |

|     |      |      |       |       |       |         |       |             |
|-----|------|------|-------|-------|-------|---------|-------|-------------|
| 271 | HG10 | BN   | BnC09 | 125.0 | 3.91  | -0.856  | 8.2%  | 124-126.2   |
| 272 | HG10 | BS   | BnC09 | 125.0 | 6.38  | -8.982  | 11.4% | 124-126.2   |
| 273 | HG10 | BTL  | BnC09 | 126.6 | 3.65  | -54.659 | 5.9%  | 125.2-128.1 |
| 274 | HG10 | BAL  | BnC09 | 130.2 | 3.63  | -4.044  | 6.6%  | 128.4-131.3 |
| 275 | GS11 | BAL  | BnA01 | 7.6   | 5.18  | -1.995  | 8.2%  | 6.4-9.1     |
| 276 | GS11 | BH   | BnA01 | 31.9  | 7.79  | 2.903   | 6.5%  | 31.5-34.2   |
| 277 | GS11 | BHP  | BnA01 | 31.9  | 5.88  | 0.016   | 5.2%  | 31.4-37.2   |
| 278 | GS11 | PSN  | BnA02 | 15.3  | 3.13  | -17.866 | 6.3%  | 12.1-16.7   |
| 279 | GS11 | BH   | BnA02 | 18.6  | 26.44 | -6.341  | 33.4% | 18.3-19.3   |
| 280 | GS11 | BHP  | BnA02 | 18.6  | 30.24 | -0.040  | 37.7% | 18.3-18.9   |
| 281 | GS11 | MILP | BnA02 | 18.6  | 25.49 | 0.035   | 22.5% | 18.3-18.7   |
| 282 | GS11 | MIL  | BnA02 | 22.0  | 8.10  | 2.599   | 9.6%  | 19.4-23.6   |
| 283 | GS11 | BAL  | BnA02 | 22.8  | 9.19  | 2.613   | 15.1% | 22-24.3     |
| 284 | GS11 | TSW  | BnA02 | 22.8  | 4.76  | 0.086   | 4.7%  | 22.1-25.3   |
| 285 | GS11 | BY   | BnA02 | 23.1  | 11.81 | -1.367  | 20.8% | 22.5-24.8   |
| 286 | GS11 | PY   | BnA02 | 24.1  | 8.17  | -1.265  | 14.6% | 22.8-25.3   |
| 287 | GS11 | PH   | BnA02 | 24.3  | 17.03 | -5.529  | 23.8% | 24.1-25.4   |
| 288 | GS11 | BN   | BnA02 | 25.3  | 21.89 | -0.488  | 33.6% | 24.3-26.3   |
| 289 | GS11 | SSN  | BnA02 | 66.6  | 7.75  | -17.267 | 15.2% | 65.6-67.8   |
| 290 | GS11 | MISN | BnA02 | 96.8  | 6.06  | 2.510   | 8.4%  | 95.6-97.8   |
| 291 | GS11 | BHP  | BnA03 | 0.0   | 3.30  | 0.012   | 2.8%  | 0-4.1       |
| 292 | GS11 | PH   | BnA03 | 52.4  | 11.07 | -4.483  | 15.7% | 49.8-55.2   |
| 293 | GS11 | PH   | BnA03 | 142.0 | 3.91  | 3.372   | 4.6%  | 141.4-143   |
| 294 | GS11 | MISN | BnA03 | 147.6 | 3.98  | 2.717   | 5.8%  | 146.2-150.9 |
| 295 | GS11 | SSN  | BnA04 | 3.2   | 6.25  | 14.829  | 12.5% | 1.5-4.5     |
| 296 | GS11 | MIYP | BnA04 | 56.4  | 17.01 | -0.035  | 25.9% | 55.9-62.5   |
| 297 | GS11 | MIY  | BnA04 | 57.2  | 6.49  | -0.223  | 8.5%  | 56.4-58.5   |
| 298 | GS11 | MIYP | BnA05 | 45.7  | 4.11  | 0.014   | 5.2%  | 44.8-48.9   |
| 299 | GS11 | MIL  | BnA06 | 24.9  | 6.30  | 2.194   | 7.8%  | 20.8-28.1   |
| 300 | GS11 | SSN  | BnA06 | 57.0  | 7.18  | 16.615  | 14.1% | 55.8-61     |
| 301 | GS11 | TSW  | BnA07 | 68.5  | 5.23  | -0.141  | 10.0% | 63.3-73.3   |
| 302 | GS11 | BN   | BnA07 | 101.8 | 4.35  | -0.216  | 4.7%  | 100.7-104.9 |
| 303 | GS11 | MIY  | BnA07 | 101.8 | 4.39  | 0.191   | 5.6%  | 100.7-102.9 |
| 304 | GS11 | PH   | BnA08 | 16.6  | 3.86  | -2.938  | 4.1%  | 16.2-19.8   |

|     |      |       |       |       |       |         |       |             |
|-----|------|-------|-------|-------|-------|---------|-------|-------------|
| 305 | GS11 | BHP   | BnA08 | 27.6  | 4.77  | -0.015  | 4.1%  | 24.3-28.7   |
| 306 | GS11 | PH    | BnA08 | 27.6  | 3.54  | -2.734  | 3.7%  | 24.6-28.7   |
| 307 | GS11 | BTL   | BnA08 | 38.3  | 5.06  | -16.439 | 9.2%  | 35.6-40.7   |
| 308 | GS11 | BN    | BnA08 | 39.6  | 7.25  | -0.258  | 7.7%  | 34.9-41.9   |
| 309 | GS11 | MILP  | BnA08 | 40.6  | 4.13  | 0.013   | 2.9%  | 35.9-41.9   |
| 310 | GS11 | BH    | BnA08 | 41.9  | 7.20  | -2.798  | 6.2%  | 41.3-43     |
| 311 | GS11 | SSN   | BnA08 | 46.7  | 4.79  | -14.132 | 9.7%  | 45.4-47.7   |
| 312 | GS11 | MISN  | BnA08 | 52.5  | 5.57  | 2.398   | 7.6%  | 51.3-54.3   |
| 313 | GS11 | MIL   | BnA09 | 40.7  | 7.04  | 2.394   | 8.8%  | 36.2-46     |
| 314 | GS11 | SSN   | BnA09 | 51.7  | 4.61  | -13.292 | 9.4%  | 47.8-53.1   |
| 315 | GS11 | BAL   | BnA09 | 89.2  | 3.91  | 1.685   | 6.0%  | 88-90.8     |
| 316 | GS11 | MILP  | BnA10 | 50.9  | 6.05  | -0.017  | 4.6%  | 48.9-54.5   |
| 317 | GS11 | BS    | BnA10 | 62.3  | 3.71  | 1.379   | 5.6%  | 59.3-63.3   |
| 318 | GS11 | MILP  | BnC01 | 1.7   | 7.39  | 0.017   | 5.1%  | 0.4-7.5     |
| 319 | GS11 | BN    | BnC01 | 3.7   | 7.17  | -0.263  | 7.4%  | 2.8-4.9     |
| 320 | GS11 | TSW   | BnC01 | 56.3  | 6.96  | -0.107  | 7.1%  | 54.3-57.4   |
| 321 | GS11 | BN    | BnC02 | 38.5  | 8.07  | 0.286   | 9.0%  | 36.8-42     |
| 322 | GS11 | PH    | BnC02 | 40.5  | 5.92  | 3.227   | 7.6%  | 38.8-42.8   |
| 323 | GS11 | MIY   | BnC03 | 58.5  | 8.83  | -0.359  | 11.9% | 56.8-61.8   |
| 324 | GS11 | MIY   | BnC03 | 72.9  | 5.39  | 0.283   | 7.0%  | 72.4-75     |
| 325 | GS11 | BSP   | BnC03 | 89.1  | 6.03  | -0.012  | 11.9% | 85.6-93.1   |
| 326 | GS11 | BAL   | BnC04 | 12.1  | 3.48  | -1.661  | 5.3%  | 11.5-14.1   |
| 327 | GS11 | MIY   | BnC04 | 109.9 | 6.90  | 0.237   | 9.1%  | 106.3-111.1 |
| 328 | GS11 | MIYP  | BnC04 | 149.9 | 7.41  | 0.023   | 9.9%  | 149.4-150.6 |
| 329 | GS11 | PH    | BnC05 | 58.8  | 3.50  | 2.426   | 3.7%  | 56.1-60.6   |
| 330 | GS11 | SSN   | BnC05 | 137.3 | 3.80  | 12.154  | 7.8%  | 132.8-138.2 |
| 331 | GS11 | TSW   | BnC06 | 54.8  | 9.75  | 0.127   | 10.3% | 53.7-55.4   |
| 332 | GS11 | BHP   | BnC07 | 15.3  | 3.74  | 0.014   | 3.4%  | 12-17.1     |
| 333 | GS11 | BN    | BnC07 | 21.9  | 11.68 | -0.416  | 16.0% | 20.3-23.2   |
| 334 | GS11 | MISNP | BnC07 | 21.9  | 4.33  | 0.012   | 7.6%  | 14.4-23.7   |
| 335 | GS11 | BTL   | BnC07 | 24.8  | 8.43  | -24.384 | 16.4% | 23.8-26.2   |
| 336 | GS11 | BSP   | BnC07 | 29.2  | 7.45  | -0.015  | 11.8% | 28.9-33.5   |
| 337 | GS11 | BS    | BnC07 | 30.4  | 5.86  | -1.946  | 8.3%  | 28.7-34.5   |
| 338 | GS11 | TSW   | BnC07 | 60.4  | 10.66 | 0.153   | 13.5% | 59.6-64.5   |



|     |      |      |       |       |       |          |       |             |
|-----|------|------|-------|-------|-------|----------|-------|-------------|
| 339 | GS11 | BSP  | BnC08 | 78.3  | 7.94  | 0.015    | 15.2% | 77.2-79.4   |
| 340 | GS11 | BS   | BnC08 | 100.6 | 7.39  | 1.987    | 11.5% | 98.7-103.9  |
| 341 | GS11 | SSN  | BnC08 | 113.0 | 11.97 | 21.754   | 26.4% | 109.5-115   |
| 342 | GS11 | MILP | BnC08 | 129.7 | 9.79  | -0.020   | 6.8%  | 128.7-131.2 |
| 343 | GS11 | MIL  | BnC08 | 130.0 | 6.70  | -2.411   | 8.0%  | 128.7-132   |
| 344 | GS11 | MISN | BnC08 | 131.0 | 9.86  | -3.248   | 14.8% | 128.8-133   |
| 345 | GS11 | BSN  | BnC09 | 136.4 | 13.48 | -153.569 | 30.4% | 135.9-136.4 |
| 346 | GS11 | PSN  | BnC09 | 136.4 | 13.17 | -156.147 | 29.1% | 135.9-136.4 |

---

**Supplementary Table S5.** Detailed information of unique QTLs.

| <b>ID</b> | <b>Environment</b>   | <b>Trait</b>                  | <b>LG</b> | <b>Peak</b> | <b>LOD</b> | <b>R<sup>2</sup></b> | <b>A</b> | <b>Interval</b> |
|-----------|----------------------|-------------------------------|-----------|-------------|------------|----------------------|----------|-----------------|
| 1         | /WH09                | /PH                           | BnA01     | 0           | 5.74       | 8.3                  | -2.6966  | 0-2.3           |
| 2         | /GS11/HG10           | /PH/BAL/MIL/MIYP              | BnA01     | 8.07        |            |                      |          | 7.41-8.74       |
| 3         | /WH10/HG10/WH09      | /MIY/SSN                      | BnA01     | 15.8        |            |                      |          | 15.19-16.41     |
| 4         | /WH10                | /TSW                          | BnA01     | 19.6        | 8.77       | 10.8                 | -0.144   | 19.2-20.7       |
| 5         | /WH09/WH10           | /TSW/MIL/SSN                  | BnA01     | 25.7        |            |                      |          | 25.16-26.24     |
| 6         | /WH10/HG10           | /MIY/MILP/PY                  | BnA01     | 29.04       |            |                      |          | 28.69-29.38     |
| 7         | /GS11                | /BH/BHP                       | BnA01     | 31.9        |            |                      |          | 30.68-33.12     |
| 8         | /WH10                | /MIL                          | BnA01     | 49.5        | 4.11       | 5.6                  | -1.9615  | 49.5-51.8       |
| 9         | /WH10                | /BAL                          | BnA01     | 57.1        | 4.18       | 3.7                  | -2.1314  | 53.7-60.4       |
| 10        | /WH09/HG10           | /BSN/BSP/TSW                  | BnA01     | 124.85      |            |                      |          | 122.22-127.47   |
| 11        | /WH09/HG10           | /BS/BTL/BN/BSN/MISNP/MIYP/SSN | BnA02     | 12.56       |            |                      |          | 11.45-13.67     |
| 12        | /GS11/WH09           | /PSN                          | BnA02     | 16.66       |            |                      |          | 15.94-17.37     |
| 13        | /GS11/WH10           | /BH/BHP/MILP                  | BnA02     | 18.6        |            |                      |          | 18.47-18.73     |
| 14        | /WH09/WH10/GS11      | /MISN/PY/BY/MIL/BAL           | BnA02     | 21.84       |            |                      |          | 21.63-22.06     |
| 15        | /WH09/WH10/HG10/GS11 | /TSW/PY/PH/BN/BHP             | BnA02     | 24.39       |            |                      |          | 23.96-24.81     |
| 16        | /WH09                | /MILP                         | BnA02     | 26.5        | 12.95      | 18.3                 | 0.0168   | 25.6-26.8       |
| 17        | /HG10                | /BSN                          | BnA02     | 31.41       | 3.41       | 6.9                  | -16.264  | 29.8-32.8       |
| 18        | /WH10                | /BH/BHP                       | BnA02     | 53.9        |            |                      |          | 53.07-54.73     |
| 19        | /WH09/HG10           | /BSP/PH                       | BnA02     | 56.76       |            |                      |          | 56.29-57.23     |
| 20        | /WH10                | /BAL                          | BnA02     | 63.6        | 9.61       | 9.1                  | -3.5622  | 63.3-66.1       |
| 21        | /GS11                | /SSN                          | BnA02     | 66.6        | 7.75       | 15.2                 | -17.2666 | 65.6-67.8       |

|    |                 |               |       |        |       |      |         |               |
|----|-----------------|---------------|-------|--------|-------|------|---------|---------------|
| 22 | /WH09           | /BHP          | BnA02 | 71.7   | 6.41  | 9.0  | 0.0182  | 71.5-72.7     |
| 23 | /GS11/HG10      | /MISN/PSN     | BnA02 | 96.95  |       |      |         | 96.11-97.8    |
| 24 | /GS11           | /BHP          | BnA03 | 0      | 0.00  | 2.8  | 0.01221 | 0-4.1         |
| 25 | /WH10           | /PY           | BnA03 | 13.5   | 3.77  | 5.4  | 0.7151  | 12-16.3       |
| 26 | /WH09           | /PY           | BnA03 | 20.1   | 3.56  | 5.6  | 0.9462  | 18.7-25.3     |
| 27 | /WH10           | /TSW          | BnA03 | 31.4   | 4.54  | 11.3 | 0.1469  | 26.6-35.4     |
| 28 | /WH09/HG10      | /TSW          | BnA03 | 43.51  |       |      |         | 42.14-44.87   |
| 29 | /GS11           | /PH           | BnA03 | 52.4   | 11.07 | 15.7 | -4.4827 | 49.8-55.2     |
| 30 | /WH10/HG10      | /SSN/BHP/MIL  | BnA03 | 71.26  |       |      |         | 70.52-72      |
| 31 | /HG10           | /BY/BSN/MISNP | BnA03 | 92.1   |       |      |         | 88.88-95.32   |
| 32 | /WH09           | /TSW          | BnA03 | 124.7  | 3.69  | 6.6  | 0.1296  | 123.3-130.8   |
| 33 | /HG10           | /BAL          | BnA03 | 133.7  | 4.43  | 13.4 | 2.9933  | 128.1-139.4   |
| 34 | /GS11           | /PH           | BnA03 | 142    | 3.91  | 4.6  | 3.3724  | 141.4-143     |
| 35 | /GS11           | /MISN         | BnA03 | 147.6  | 3.98  | 5.8  | 2.717   | 146.2-150.9   |
| 36 | /WH10           | /BSP          | BnA03 | 153.8  | 7.67  | 15.1 | -0.0192 | 153.4-156.4   |
| 37 | /WH10/HG10      | /BN/BTL       | BnA03 | 163.4  |       |      |         | 162.73-164.07 |
| 38 | /WH10/HG10      | /MISN/MIY     | BnA03 | 175.77 |       |      |         | 174.59-176.94 |
| 39 | /WH10           | /BSP          | BnA03 | 183.9  | 4.32  | 8.6  | 0.0109  | 182-186.2     |
| 40 | /GS11           | /SSN          | BnA04 | 3.2    | 6.25  | 12.5 | 14.8294 | 1.5-4.5       |
| 41 | /HG10           | /MISN         | BnA04 | 22.2   | 3.51  | 6.0  | 2.372   | 14.5-31.8     |
| 42 | /WH09/WH10/HG10 | /MILP/BH/BHP  | BnA04 | 41.78  |       |      |         | 40.9-42.65    |
| 43 | /WH10           | /PY           | BnA04 | 49.5   | 5.57  | 9.7  | -0.8747 | 47.2-50.8     |
| 44 | /WH10/GS11      | /BY/MIYP/MIY  | BnA04 | 56.99  |       |      |         | 56.06-57.91   |
| 45 | /WH10           | /PY           | BnA05 | 20.4   | 9.38  | 14.4 | 1.0819  | 19.7-22.5     |

|    |                      |                           |       |        |      |      |         |  |               |
|----|----------------------|---------------------------|-------|--------|------|------|---------|--|---------------|
| 46 | /WH10/GS11           | /MIL/MIYP                 | BnA05 | 45.7   |      |      |         |  | 44.46-46.94   |
| 47 | /WH09                | /MIYP                     | BnA05 | 59.5   | 6.31 | 10.1 | 0.0185  |  | 58.2-60.8     |
| 48 | /WH09                | /MILP                     | BnA05 | 62.5   | 3.44 | 4.3  | -0.0089 |  | 60.5-62.6     |
| 49 | /WH09/HG10           | /MIY/SSN                  | BnA06 | 0.3    |      |      |         |  | 0-0.84        |
| 50 | /WH10                | /MIL                      | BnA06 | 8.2    | 3.28 | 3.8  | 1.6382  |  | 7.3-9.9       |
| 51 | /GS11                | /MIL                      | BnA06 | 24.9   | 6.30 | 7.8  | 2.1935  |  | 20.8-28.1     |
| 52 | /HG10                | /BS                       | BnA06 | 34.7   | 7.97 | 11.3 | 2.2542  |  | 34.1-35.9     |
| 53 | /GS11/WH09           | /SSN                      | BnA06 | 58.32  |      |      |         |  | 57.09-59.55   |
| 54 | /WH10                | /PSN/BSN                  | BnA06 | 64.07  |      |      |         |  | 62.79-65.35   |
| 55 | /HG10                | /PH                       | BnA07 | 8.3    | 6.76 | 11.8 | 4.231   |  | 6.8-12.1      |
| 56 | /WH10                | /MIL                      | BnA07 | 40.9   | 4.92 | 5.6  | -2.2777 |  | 39.6-43.1     |
| 57 | /GS11                | /TSW                      | BnA07 | 68.5   | 5.23 | 10.0 | -0.1406 |  | 63.3-73.3     |
| 58 | /WH09                | /PH                       | BnA07 | 81.5   | 6.20 | 9.0  | -2.8387 |  | 80.9-83.4     |
| 59 | /HG10                | /BAL/TSW                  | BnA07 | 86.82  |      |      |         |  | 85.8-87.85    |
| 60 | /WH09                | /BS                       | BnA07 | 93.1   | 7.96 | 11.6 | -2.4669 |  | 92.5-94.2     |
| 61 | /HG10                | /TSW                      | BnA07 | 96.2   | 8.95 | 9.4  | -0.1258 |  | 95.3-96.7     |
| 62 | /WH10                | /MIYP                     | BnA07 | 98.6   | 4.89 | 9.6  | 0.011   |  | 97.9-98.9     |
| 63 | /GS11                | /BN/MIY                   | BnA07 | 101.8  |      |      |         |  | 100.83-102.77 |
| 64 | /WH09/HG10           | /BTL/TSW                  | BnA07 | 111.82 |      |      |         |  | 110.83-112.82 |
| 65 | /WH09                | /TSW                      | BnA07 | 121.9  | 5.28 | 6.2  | -0.1213 |  | 121.5-122.2   |
| 66 | /WH09/WH10           | /BAL/PH                   | BnA08 | 1.32   |      |      |         |  | 0-2.72        |
| 67 | /WH09/WH10/HG10/GS11 | /MISNP/BY/MIYP/BSN/PH/PSN | BnA08 | 15.96  |      |      |         |  | 15.53-16.39   |
| 68 | /GS11                | /BHP/PH                   | BnA08 | 27.6   |      |      |         |  | 26.1-29.1     |
| 69 | /WH09/HG10           | /BTL/BSN/PH/PSN           | BnA08 | 30.09  |      |      |         |  | 29.75-30.42   |

|    |                      |                                  |       |       |       |      |           |  |             |
|----|----------------------|----------------------------------|-------|-------|-------|------|-----------|--|-------------|
| 70 | /WH09/WH10/HG10/GS11 | /BH/BN/BS/BTL/MILP               | BnA08 | 36.82 |       |      |           |  | 35.82-37.82 |
| 71 | /GS11                | /BH                              | BnA08 | 41.9  | 7.20  | 6.2  | -2.7982   |  | 41.3-43     |
| 72 | /WH10                | /PH                              | BnA08 | 43.3  | 5.23  | 7.6  | -4.4135   |  | 43.1-46.5   |
| 73 | /HG10/GS11           | /BN/SSN                          | BnA08 | 46.31 |       |      |           |  | 45.35-47.27 |
| 74 | /GS11                | /MISN                            | BnA08 | 52.5  | 5.57  | 7.6  | 2.3977    |  | 51.3-54.3   |
| 75 | /WH09                | /BSP                             | BnA08 | 65.2  | 3.45  | 5.2  | -0.009767 |  | 59-68.5     |
| 76 | /HG10                | /BS/BSP                          | BnA09 | 19.7  |       |      |           |  | 17.82-21.58 |
| 77 | /WH09                | /BSP                             | BnA09 | 26.7  | 11.16 | 19.0 | -0.0184   |  | 23.8-27.7   |
| 78 | /WH09/GS11           | /MIL/MISN                        | BnA09 | 44.67 |       |      |           |  | 41.7-47.65  |
| 79 | /GS11/WH10/HG10      | /PY/TSW/SSN                      | BnA09 | 52.95 |       |      |           |  | 52.26-53.64 |
| 80 | /HG10/WH10           | /MIL/MISN/MILP                   | BnA09 | 62.47 |       |      |           |  | 61.75-63.19 |
| 81 | /WH09                | /MIY/MIL/MILP                    | BnA09 | 79.14 |       |      |           |  | 78.1-80.19  |
| 82 | /GS11                | /BAL                             | BnA09 | 89.2  | 3.91  | 6.0  | 1.6847    |  | 88-90.8     |
| 83 | /WH10                | /MIL                             | BnA10 | 39.1  | 4.92  | 5.6  | -2.1297   |  | 34.1-42.4   |
| 84 | /HG10                | /BN                              | BnA10 | 43.1  | 6.29  | 9.4  | 0.3036    |  | 42.3-44     |
| 85 | /WH10/HG10/GS11      | /BS/MIY/SSN/PH/BH/MILP/BHP/BY/PY | BnA10 | 47.02 |       |      |           |  | 46.6-47.43  |
| 86 | /WH10                | /MISNP                           | BnA10 | 56.2  | 3.78  | 6.9  | -0.0086   |  | 55.2-57     |
| 87 | /HG10/GS11           | /BS/BY                           | BnA10 | 62.3  |       |      |           |  | 60.68-63.92 |
| 88 | /WH10/HG10/GS11      | /SSN/TSW/MILP                    | BnC01 | 0.07  |       |      |           |  | 0-0.77      |
| 89 | /GS11/WH09/HG10      | /BN                              | BnC01 | 4.09  |       |      |           |  | 3.47-4.72   |
| 90 | /WH10                | /MISN                            | BnC01 | 53.7  | 4.72  | 7.2  | 2.3199    |  | 51.9-55.5   |
| 91 | /GS11                | /TSW                             | BnC01 | 56.3  | 6.96  | 7.1  | -0.1069   |  | 54.3-57.4   |
| 92 | /HG10                | /MIYP                            | BnC01 | 71.4  | 5.22  | 9.6  | -0.0104   |  | 68.7-74.8   |
| 93 | /WH10                | /PY                              | BnC02 | 2.0   | 4.33  | 5.5  | 1.0655    |  | 1-7.3       |

|     |                 |                           |       |        |      |      |         |               |
|-----|-----------------|---------------------------|-------|--------|------|------|---------|---------------|
| 94  | /WH09/WH10/HG10 | /MIY/BH/MISN              | BnC02 | 10.18  |      |      |         | 8.14-12.21    |
| 95  | /WH09/GS11      | /BN                       | BnC02 | 35.39  |      |      |         | 34.63-36.16   |
| 96  | /GS11           | /PH                       | BnC02 | 40.5   | 5.92 | 7.6  | 3.2266  | 38.8-42.8     |
| 97  | /WH10           | /BN                       | BnC02 | 42.8   | 9.01 | 10.1 | 0.4778  | 42.2-43.6     |
| 98  | /HG10           | /BSP                      | BnC02 | 51.3   | 3.51 | 4.9  | -0.0088 | 50-53.4       |
| 99  | /WH09/WH10      | /MISN/BSP                 | BnC02 | 57.47  |      |      |         | 53.47-61.46   |
| 100 | /WH10           | /PY                       | BnC02 | 97.2   | 3.23 | 4.6  | -0.5862 | 97.2-99.1     |
| 101 | /WH09           | /BAL                      | BnC03 | 38.2   | 5.24 | 8.0  | -1.7267 | 27.8-43.5     |
| 102 | /GS11           | /MIY                      | BnC03 | 58.5   | 8.83 | 11.9 | -0.3587 | 56.8-61.8     |
| 103 | /GS11           | /MIY                      | BnC03 | 72.9   | 5.39 | 7.0  | 0.2831  | 72.4-75       |
| 104 | /WH10           | /MIYP                     | BnC03 | 77.8   | 3.54 | 7.5  | 0.0127  | 74.5-79.6     |
| 105 | /WH10           | /MIY                      | BnC03 | 85.1   | 3.57 | 4.8  | 0.1475  | 81.5-88.6     |
| 106 | /GS11           | /BSP                      | BnC03 | 89.1   | 6.03 | 11.9 | -0.0123 | 85.6-93.1     |
| 107 | /WH09/HG10      | /BTL/BHP                  | BnC03 | 94.06  |      |      |         | 92.84-95.27   |
| 108 | /WH09/WH10/HG10 | /BS/SSN/BH                | BnC03 | 103.26 |      |      |         | 102.91-103.61 |
| 109 | /HG10           | /BS                       | BnC04 | 2.9    | 5.45 | 7.5  | 1.8609  | 1-5.6         |
| 110 | /WH09/GS11      | /BH/BAL                   | BnC04 | 11.63  |      |      |         | 11.02-12.25   |
| 111 | /WH10/HG10      | /BH/PH/MISNP/BHP/MIYP/BSN | BnC04 | 18.6   |      |      |         | 18.21-19      |
| 112 | /HG10           | /MIY/BY/PY                | BnC04 | 55.38  |      |      |         | 54.97-55.8    |
| 113 | /WH10           | /BY                       | BnC04 | 59.3   | 4.97 | 8.3  | 0.7891  | 58-60.3       |
| 114 | /WH09           | /PH                       | BnC04 | 65.4   | 8.15 | 12.1 | 3.3957  | 64.2-67.4     |
| 115 | /WH10           | /MIY                      | BnC04 | 69.4   | 3.65 | 5.6  | 0.2099  | 66.5-74.6     |
| 116 | /WH09           | /BY/PY                    | BnC04 | 89.7   |      |      |         | 89.19-90.21   |
| 117 | /WH09/WH10/GS11 | /MIY/BH/MISNP/PY          | BnC04 | 106.3  |      |      |         | 105.02-107.58 |

|     |                 |                      |       |        |       |      |          |  |               |
|-----|-----------------|----------------------|-------|--------|-------|------|----------|--|---------------|
| 118 | /WH09/WH10      | /BHP                 | BnC04 | 117.54 |       |      |          |  | 114.41-120.68 |
| 119 | /WH10           | /MILP                | BnC04 | 122    | 3.95  | 4.7  | -0.0183  |  | 119-124.7     |
| 120 | /WH09           | /BSP                 | BnC04 | 140.7  | 4.39  | 6.0  | -0.0113  |  | 139.2-141.6   |
| 121 | /WH10           | /MILP                | BnC04 | 147.3  | 3.77  | 4.1  | 0.0169   |  | 145.9-148.8   |
| 122 | /GS11           | /MIYP                | BnC04 | 149.9  | 7.41  | 9.9  | 0.0228   |  | 149.4-150.6   |
| 123 | /HG10           | /PSN/BSN             | BnC05 | 9.8    |       |      |          |  | 9.2-10.4      |
| 124 | /WH09/GS11      | /BY/PY/PH/BAL        | BnC05 | 59.44  |       |      |          |  | 58.4-60.4     |
| 125 | /WH09/WH10/HG10 | /TSW/MILP/MISNP      | BnC05 | 99.75  |       |      |          |  | 97.6-101.9    |
| 126 | /WH10/HG10      | /BN/MIY              | BnC05 | 115.48 |       |      |          |  | 113.7-117.2   |
| 127 | /GS11           | /SSN                 | BnC05 | 137.3  | 3.80  | 7.8  | 12.154   |  | 132.8-138.2   |
| 128 | /WH09           | /MISN                | BnC06 | 2.9    | 5.02  | 5.3  | 2.5455   |  | 1.9-3.0       |
| 129 | /HG10           | /SSN                 | BnC06 | 5.5    | 4.50  | 6.3  | -8.8749  |  | 4.1-8.8       |
| 130 | /WH09           | /MIL                 | BnC06 | 14.8   | 7.30  | 14.2 | 2.0932   |  | 11.4-19.0     |
| 131 | /HG10           | /TSW                 | BnC06 | 31.3   | 12.93 | 15.4 | 0.1581   |  | 29.8-32.2     |
| 132 | /WH09/WH10      | /BN/BS/TSW           | BnC06 | 39.72  |       |      |          |  | 39.4-40.0     |
| 133 | /WH10/HG10      | /MILP/MIL            | BnC06 | 43.38  |       |      |          |  | 42.7-44.1     |
| 134 | /WH09/WH10/HG10 | /BAL/BH/BHP/PH       | BnC06 | 45.5   |       |      |          |  | 44.9-46.1     |
| 135 | /WH09           | /MILP                | BnC06 | 49.1   | 14.65 | 20.8 | 0.0183   |  | 48.8-49.1     |
| 136 | /WH10/HG10/GS11 | /BAL/BH/BHP/MILP/TSW | BnC06 | 54.8   |       |      |          |  | 54.4-55.2     |
| 137 | /WH09/WH10/GS11 | /MISN/TSW/BHP        | BnC07 | 14.21  |       |      |          |  | 12.79-15.63   |
| 138 | /WH09/HG10      | /BH/BTL              | BnC07 | 18.48  |       |      |          |  | 16.83-20.12   |
| 139 | /GS11           | /BN/MISNP            | BnC07 | 21.9   |       |      |          |  | 20.52-23.28   |
| 140 | /GS11           | /BTL                 | BnC07 | 24.8   | 8.43  | 16.4 | -24.3842 |  | 23.8-26.2     |
| 141 | /HG10           | /MIY                 | BnC07 | 26.2   | 4.08  | 6.4  | 0.2141   |  | 25.1-28.5     |

|     |                 |                    |       |        |      |      |          |  |               |
|-----|-----------------|--------------------|-------|--------|------|------|----------|--|---------------|
| 142 | /GS11           | /BSP/BS            | BnC07 | 29.66  |      |      |          |  | 27.86-31.47   |
| 143 | /GS11/WH09      | /TSW               | BnC07 | 61.3   |      |      |          |  | 59.25-63.35   |
| 144 | /WH10           | /BTL               | BnC07 | 68.6   | 4.88 | 7.5  | -23.0178 |  | 66.6-69.7     |
| 145 | /HG10           | /TSW               | BnC07 | 75.8   | 3.78 | 3.4  | 0.0706   |  | 75.2-76.7     |
| 146 | /WH09           | /BN/BSN/PSN/MIYP   | BnC08 | 60.39  |      |      |          |  | 59.55-61.22   |
| 147 | /WH09/HG10      | /MISNP/MISN/BHP    | BnC08 | 74.06  |      |      |          |  | 72.5-75.62    |
| 148 | /HG10/GS11      | /BH/BSP            | BnC08 | 77.99  |      |      |          |  | 77.23-78.75   |
| 149 | /GS11           | /BS                | BnC08 | 100.6  | 7.39 | 11.5 | 1.9871   |  | 98.7-103.9    |
| 150 | /WH10/GS11      | /BSN/PSN/SSN/MISN  | BnC08 | 115.76 |      |      |          |  | 114.48-117.03 |
| 151 | /WH09/HG10      | /SSN/PSN           | BnC08 | 126.59 |      |      |          |  | 125.43-127.74 |
| 152 | /WH09/HG10/GS11 | /BSN/MILP/MIL/MISN | BnC08 | 129.79 |      |      |          |  | 129.26-130.32 |
| 153 | /HG10           | /PSN               | BnC08 | 133    | 9.07 | 15.7 | -24.8761 |  | 131.1-134     |
| 154 | /HG10           | /MILP              | BnC08 | 135    | 3.77 | 4.4  | -0.0091  |  | 133.7-135.3   |
| 155 | /WH10           | /BY/PY             | BnC08 | 137.6  |      |      |          |  | 136.87-138.33 |
| 156 | /HG10           | /BSP               | BnC08 | 143.7  | 7.78 | 11.3 | 0.0128   |  | 141.6-144.2   |
| 157 | /HG10           | /BSP               | BnC09 | 18.7   | 5.36 | 7.9  | 0.0109   |  | 16.3-20.3     |
| 158 | /WH10           | /PH                | BnC09 | 88.2   | 4.54 | 7.5  | 5.0676   |  | 84.6-91       |
| 159 | /WH09           | /MIYP              | BnC09 | 97.9   | 7.18 | 12.0 | 0.039    |  | 96.3-99.2     |
| 160 | /HG10           | /BN/BS/BTL         | BnC09 | 125.36 |      |      |          |  | 124.67-126.04 |
| 161 | /HG10           | /BAL               | BnC09 | 130.2  | 3.63 | 6.6  | -4.0439  |  | 128.4-131.3   |
| 162 | /GS11           | /BSN/PSN           | BnC09 | 136.4  |      |      |          |  | 136.22-136.58 |
| 163 | /WH10           | /BAL               | BnC09 | 159.5  | 5.11 | 4.7  | 3.9132   |  | 157.7-161.8   |



**Supplementary Table S6.** Detailed information and references of the genes for plant architecture

| Gene (Reference)            | Species            | Pathway | Copy number     |
|-----------------------------|--------------------|---------|-----------------|
|                             |                    |         | <i>B. napus</i> |
| <i>ARF1</i> <sup>1</sup>    | <i>Arabidopsis</i> | Aux/IAA | 3               |
| <i>ARF19</i> <sup>2</sup>   | <i>Arabidopsis</i> | Aux/IAA | 6               |
| <i>ARF2</i> <sup>2</sup>    | <i>Arabidopsis</i> | Aux/IAA | 8               |
| <i>ARF7</i> <sup>2</sup>    | <i>Arabidopsis</i> | Aux/IAA | 2               |
| <i>ARGOS</i> <sup>3</sup>   | <i>Arabidopsis</i> | Aux/IAA | 3               |
| <i>AtPGP1</i> <sup>4</sup>  | <i>Arabidopsis</i> | Aux/IAA | 3               |
| <i>AtPGP19</i> <sup>4</sup> | <i>Arabidopsis</i> | Aux/IAA | 6               |
| <i>AtPGP4</i> <sup>5</sup>  | <i>Arabidopsis</i> | Aux/IAA | 6               |
| <i>AUX1</i> <sup>6</sup>    | <i>Arabidopsis</i> | Aux/IAA | 6               |
| <i>AVP1</i> <sup>7</sup>    | <i>Arabidopsis</i> | Aux/IAA | 8               |
| <i>AXR1</i> <sup>8</sup>    | <i>Arabidopsis</i> | Aux/IAA | 9               |
| <i>AXR2</i> <sup>9</sup>    | <i>Arabidopsis</i> | Aux/IAA | 7               |
| <i>AXR3</i> <sup>10</sup>   | <i>Arabidopsis</i> | Aux/IAA | 6               |
| <i>AXR6</i> <sup>9</sup>    | <i>Arabidopsis</i> | Aux/IAA | 8               |
| <i>BUD1</i> <sup>11</sup>   | <i>Arabidopsis</i> | Aux/IAA | 4               |
| <i>BUD2</i> <sup>12</sup>   | <i>Arabidopsis</i> | Aux/IAA | 5               |
| <i>IAA14</i> <sup>13</sup>  | <i>Arabidopsis</i> | Aux/IAA | 7               |
| <i>IAA18</i> <sup>14</sup>  | <i>Arabidopsis</i> | Aux/IAA | 5               |
| <i>IAA28</i> <sup>15</sup>  | <i>Arabidopsis</i> | Aux/IAA | 4               |
| <i>IAA3</i> <sup>16</sup>   | <i>Arabidopsis</i> | Aux/IAA | 4               |
| <i>IAA6</i> <sup>17</sup>   | <i>Arabidopsis</i> | Aux/IAA | 2               |
| <i>IAA9</i> <sup>18</sup>   | <i>Arabidopsis</i> | Aux/IAA | 9               |
| <i>LAX1</i> <sup>19</sup>   | <i>Arabidopsis</i> | Aux/IAA | 6               |
| <i>LAX2</i> <sup>19</sup>   | <i>Arabidopsis</i> | Aux/IAA | 7               |
| <i>LAX3</i> <sup>19</sup>   | <i>Arabidopsis</i> | Aux/IAA | 4               |
| <i>MP</i> <sup>2</sup>      | <i>Arabidopsis</i> | Aux/IAA | 6               |
| <i>PID</i> <sup>20</sup>    | <i>Arabidopsis</i> | Aux/IAA | 3               |
| <i>PIN1</i> <sup>21</sup>   | <i>Arabidopsis</i> | Aux/IAA | 4               |
| <i>PIN2</i> <sup>22</sup>   | <i>Arabidopsis</i> | Aux/IAA | 6               |
| <i>PIN6</i> <sup>23</sup>   | <i>Arabidopsis</i> | Aux/IAA | 2               |
| <i>PIN7</i> <sup>23</sup>   | <i>Arabidopsis</i> | Aux/IAA | 6               |

|                                |                        |                |                  |
|--------------------------------|------------------------|----------------|------------------|
| <i>TIR1</i> <sup>24</sup>      | <i>Arabidopsis</i>     | Aux/IAA        | 6                |
| <i>UCH1</i> <sup>25</sup>      | <i>Arabidopsis</i>     | Aux/IAA        | 2                |
| <i>UCH2</i> <sup>25</sup>      | <i>Arabidopsis</i>     | Aux/IAA        | 2                |
| <i>BR2</i> <sup>26</sup>       | Maize                  | Aux/IAA        | 6                |
| <i>DAD1</i> <sup>27</sup>      | <i>Petunia hybrida</i> | Aux/IAA        | 2                |
| <i>D10</i> <sup>28</sup>       | Rice                   | Aux/IAA        | 2                |
| <i>IAA20</i> <sup>29</sup>     | Rice                   | Aux/IAA        | 0                |
| <i>SAMDC1</i> <sup>12,30</sup> | Rice                   | Aux/IAA        | 7                |
| <i>SoDW3</i> <sup>26</sup>     | Sorghum                | Aux/IAA        | 6                |
| <b>Sub total</b>               | <b>40 (34)</b>         | <b>Aux/IAA</b> | <b>198 (175)</b> |
| <i>AHK1</i> <sup>31</sup>      | <i>Arabidopsis</i>     | CK             | 2                |
| <i>AHK2</i> <sup>31</sup>      | <i>Arabidopsis</i>     | CK             | 4                |
| <i>AHK3</i> <sup>31</sup>      | <i>Arabidopsis</i>     | CK             | 2                |
| <i>AHK4</i> <sup>31</sup>      | <i>Arabidopsis</i>     | CK             | 2                |
| <i>AHK5</i> <sup>31</sup>      | <i>Arabidopsis</i>     | CK             | 7                |
| <i>AMP1</i> <sup>32</sup>      | <i>Arabidopsis</i>     | CK             | 3                |
| <i>ARR15</i> <sup>33</sup>     | <i>Arabidopsis</i>     | CK             | 4                |
| <i>ARR5</i> <sup>34</sup>      | <i>Arabidopsis</i>     | CK             | 8                |
| <i>ARR6</i> <sup>33</sup>      | <i>Arabidopsis</i>     | CK             | 8                |
| <i>ARR7</i> <sup>33</sup>      | <i>Arabidopsis</i>     | CK             | 4                |
| <i>BP</i> <sup>35</sup>        | <i>Arabidopsis</i>     | CK             | 3                |
| <i>CKX2</i> <sup>36</sup>      | <i>Arabidopsis</i>     | CK             | 4                |
| <i>CLV1</i> <sup>37</sup>      | <i>Arabidopsis</i>     | CK             | 2                |
| <i>CLV2</i> <sup>38</sup>      | <i>Arabidopsis</i>     | CK             | 2                |
| <i>CLV3</i> <sup>39</sup>      | <i>Arabidopsis</i>     | CK             | 0                |
| <i>IPT5</i> <sup>35</sup>      | <i>Arabidopsis</i>     | CK             | 4                |
| <i>IPT7</i> <sup>35</sup>      | <i>Arabidopsis</i>     | CK             | 3                |
| <i>KN1</i> <sup>40</sup>       | <i>Arabidopsis</i>     | CK             | 2                |
| <i>STM</i> <sup>41</sup>       | <i>Arabidopsis</i>     | CK             | 3                |
| <i>WUS</i> <sup>42</sup>       | <i>Arabidopsis</i>     | CK             | 5                |
| <i>LOG</i> <sup>43</sup>       | Rice                   | CK             | 29               |
| <i>OsCKX2</i> <sup>44</sup>    | Rice                   | CK             | 0                |
| <b>Sub total</b>               | <b>22 (20)</b>         | <b>CK</b>      | <b>101 (72)</b>  |
| <i>DWF1A</i> <sup>45</sup>     | <i>Arabidopsis</i>     | GA             | 4                |
| <i>DWF1B</i> <sup>45</sup>     | <i>Arabidopsis</i>     | GA             | 6                |

|                               |                    |    |    |
|-------------------------------|--------------------|----|----|
| <i>DWF1C</i> <sup>45</sup>    | <i>Arabidopsis</i> | GA | 2  |
| <i>GA20ox 1</i> <sup>46</sup> | <i>Arabidopsis</i> | GA | 10 |
| <i>GA20ox 2</i> <sup>46</sup> | <i>Arabidopsis</i> | GA | 10 |
| <i>GA20ox 3</i> <sup>46</sup> | <i>Arabidopsis</i> | GA | 6  |
| <i>GA20ox 4</i> <sup>47</sup> | <i>Arabidopsis</i> | GA | 5  |
| <i>GA20ox 5</i> <sup>47</sup> | <i>Arabidopsis</i> | GA | 3  |
| <i>GA2ox 1</i> <sup>48</sup>  | <i>Arabidopsis</i> | GA | 7  |
| <i>GA2ox 2</i> <sup>48</sup>  | <i>Arabidopsis</i> | GA | 6  |
| <i>GA2ox 3</i> <sup>48</sup>  | <i>Arabidopsis</i> | GA | 5  |
| <i>GA2ox 4</i> <sup>48</sup>  | <i>Arabidopsis</i> | GA | 2  |
| <i>GA2ox 5</i> <sup>48</sup>  | <i>Arabidopsis</i> | GA | 0  |
| <i>GA2ox 6</i> <sup>48</sup>  | <i>Arabidopsis</i> | GA | 4  |
| <i>GA2ox 7</i> <sup>48</sup>  | <i>Arabidopsis</i> | GA | 2  |
| <i>GA2ox 8</i> <sup>48</sup>  | <i>Arabidopsis</i> | GA | 7  |
| <i>GA3ox 1</i> <sup>47</sup>  | <i>Arabidopsis</i> | GA | 4  |
| <i>GA3ox 2</i> <sup>47</sup>  | <i>Arabidopsis</i> | GA | 5  |
| <i>GA3ox 3</i> <sup>47</sup>  | <i>Arabidopsis</i> | GA | 2  |
| <i>GA3ox 4</i> <sup>47</sup>  | <i>Arabidopsis</i> | GA | 2  |
| <i>GAI</i> <sup>49</sup>      | <i>Arabidopsis</i> | GA | 0  |
| <i>KTNI</i> <sup>50</sup>     | <i>Arabidopsis</i> | GA | 4  |
| <i>RGA</i> <sup>51</sup>      | <i>Arabidopsis</i> | GA | 4  |
| <i>RGL1</i> <sup>52</sup>     | <i>Arabidopsis</i> | GA | 2  |
| <i>SH1</i> <sup>53</sup>      | <i>Arabidopsis</i> | GA | 2  |
| <i>SLY1</i> <sup>54</sup>     | <i>Arabidopsis</i> | GA | 2  |
| <i>SLY2</i> <sup>54</sup>     | <i>Arabidopsis</i> | GA | 6  |
| <i>SPY</i> <sup>55</sup>      | <i>Arabidopsis</i> | GA | 4  |
| <i>D8</i> <sup>56</sup>       | Maize              | GA | 10 |
| <i>PHOR</i> <sup>57</sup>     | Maize              | GA | 0  |
| <i>BC12</i> <sup>58</sup>     | Rice               | GA | 12 |
| <i>D1</i> <sup>59</sup>       | Rice               | GA | 2  |
| <i>D62</i> <sup>60</sup>      | Rice               | GA | 4  |
| <i>DGL1</i> <sup>50</sup>     | Rice               | GA | 4  |
| <i>EUI</i> <sup>61</sup>      | Rice               | GA | 0  |
| <i>GSRI</i> <sup>62</sup>     | Rice               | GA | 0  |
| <i>GID1</i> <sup>63</sup>     | Rice               | GA | 10 |

|                               |                    |           |                  |
|-------------------------------|--------------------|-----------|------------------|
| <i>GID2</i> <sup>64</sup>     | Rice               | GA        | 0                |
| <i>Os20ox2</i> <sup>65</sup>  | Rice               | GA        | 10               |
| <i>SD1</i> <sup>66</sup>      | Rice               | GA        | 0                |
| <i>SLR1</i> <sup>64</sup>     | Rice               | GA        | 6                |
| <i>RHT1</i> <sup>67</sup>     | Wheat              | GA        | 6                |
| <b>Sub total</b>              | <b>42 (28)</b>     | <b>GA</b> | <b>180 (116)</b> |
| <i>ARL</i> <sup>68</sup>      | <i>Arabidopsis</i> | BR        | 6                |
| <i>BAK1</i> <sup>69</sup>     | <i>Arabidopsis</i> | BR        | 11               |
| <i>BES1</i> <sup>70</sup>     | <i>Arabidopsis</i> | BR        | 6                |
| <i>BIN2</i> <sup>71</sup>     | <i>Arabidopsis</i> | BR        | 7                |
| <i>BKII</i> <sup>72</sup>     | <i>Arabidopsis</i> | BR        | 3                |
| <i>BRII</i> <sup>69</sup>     | <i>Arabidopsis</i> | BR        | 7                |
| <i>BSUI</i> <sup>72</sup>     | <i>Arabidopsis</i> | BR        | 0                |
| <i>BZRI</i> <sup>73</sup>     | <i>Arabidopsis</i> | BR        | 0                |
| <i>CPD</i> <sup>74</sup>      | <i>Arabidopsis</i> | BR        | 7                |
| <i>DWF4</i> <sup>74</sup>     | <i>Arabidopsis</i> | BR        | 4                |
| <i>GRAS19</i> <sup>75</sup>   | Maize              | BR        | 3                |
| <i>BUI</i> <sup>76</sup>      | Rice               | BR        | 4                |
| <i>CYP724B1</i> <sup>77</sup> | Rice               | BR        | 4                |
| <i>CYP90D2</i> <sup>78</sup>  | Rice               | BR        | 3                |
| <i>D11</i> <sup>78</sup>      | Rice               | BR        | 4                |
| <i>D2</i> <sup>79</sup>       | Rice               | BR        | 3                |
| <i>ILAI</i> <sup>80</sup>     | Rice               | BR        | 13               |
| <i>ILII</i> <sup>81</sup>     | Rice               | BR        | 0                |
| <i>LIC</i> <sup>82</sup>      | Rice               | BR        | 2                |
| <i>MADS22</i> <sup>83</sup>   | Rice               | BR        | 4                |
| <i>OsMDP1</i> <sup>84</sup>   | Rice               | BR        | 2                |
| <i>RAVLI</i> <sup>85</sup>    | Rice               | BR        | 0                |
| <i>TUDI</i> <sup>86</sup>     | Rice               | BR        | 4                |
| <i>XIAO</i> <sup>87</sup>     | Rice               | BR        | 4                |
| <i>GRAS7</i> <sup>75</sup>    | <i>Solanum</i>     | BR        | 16               |
| <b>Sub total</b>              | <b>25 (10)</b>     | <b>BR</b> | <b>117 (51)</b>  |
| <i>BRC1</i> <sup>88</sup>     | <i>Arabidopsis</i> | SL        | 1                |
| <i>BRC2</i> <sup>88</sup>     | <i>Arabidopsis</i> | SL        | 6                |
| <i>IAA12</i> <sup>89</sup>    | <i>Arabidopsis</i> | SL        | 4                |

|                               |                        |           |                |
|-------------------------------|------------------------|-----------|----------------|
| <i>MAX1</i> <sup>90</sup>     | <i>Arabidopsis</i>     | SL        | 1              |
| <i>MAX2</i> <sup>91</sup>     | <i>Arabidopsis</i>     | SL        | 1              |
| <i>MAX3</i> <sup>92</sup>     | <i>Arabidopsis</i>     | SL        | 2              |
| <i>MAX4</i> <sup>93</sup>     | <i>Arabidopsis</i>     | SL        | 3              |
| <i>TBI</i> <sup>94</sup>      | Maize                  | SL        | 0              |
| <i>DAD2</i> <sup>95</sup>     | <i>Petunia hybrida</i> | SL        | 7              |
| <i>RMS1</i> <sup>93</sup>     | <i>Pisum sativum</i>   | SL        | 2              |
| <i>RMS4</i> <sup>96</sup>     | <i>Pisum sativum</i>   | SL        | 0              |
| <i>RMS5</i> <sup>96</sup>     | <i>Pisum sativum</i>   | SL        | 2              |
| <i>D14</i> <sup>97</sup>      | Rice                   | SL        | 7              |
| <i>D17</i> <sup>98</sup>      | Rice                   | SL        | 2              |
| <i>D27</i> <sup>99</sup>      | Rice                   | SL        | 2              |
| <i>D3</i> <sup>26</sup>       | Rice                   | SL        | 4              |
| <i>D53</i> <sup>100,101</sup> | Rice                   | SL        | 6              |
| <i>D88</i> <sup>102</sup>     | Rice                   | SL        | 7              |
| <i>HTD2</i> <sup>103</sup>    | Rice                   | SL        | 7              |
| <i>OsTBI</i> <sup>104</sup>   | Rice                   | SL        | 0              |
| <i>SLB1</i> <sup>105</sup>    | Rice                   | SL        | 2              |
| <i>SLB2</i> <sup>105</sup>    | Rice                   | SL        | 2              |
| <b>Sub total</b>              | <b>22 (7)</b>          | <b>SL</b> | <b>68 (18)</b> |
| <i>APC10</i> <sup>106</sup>   | <i>Arabidopsis</i>     | CC        | 2              |
| <i>APC13</i> <sup>107</sup>   | <i>Arabidopsis</i>     | CC        | 2              |
| <i>APC2</i> <sup>108</sup>    | <i>Arabidopsis</i>     | CC        | 3              |
| <i>APC4</i> <sup>109</sup>    | <i>Arabidopsis</i>     | CC        | 2              |
| <i>APC6</i> <sup>110</sup>    | <i>Arabidopsis</i>     | CC        | 3              |
| <i>APC8</i> <sup>107</sup>    | <i>Arabidopsis</i>     | CC        | 5              |
| <i>AtD27</i> <sup>111</sup>   | <i>Arabidopsis</i>     | CC        | 2              |
| <i>CCS52A1</i> <sup>112</sup> | <i>Arabidopsis</i>     | CC        | 9              |
| <i>CCS52A2</i> <sup>112</sup> | <i>Arabidopsis</i>     | CC        | 8              |
| <i>CCS52B</i> <sup>112</sup>  | <i>Arabidopsis</i>     | CC        | 2              |
| <i>Cdc20.1</i> <sup>113</sup> | <i>Arabidopsis</i>     | CC        | 7              |
| <i>Cdc20.2</i> <sup>113</sup> | <i>Arabidopsis</i>     | CC        | 7              |
| <i>Cdc20.3</i> <sup>113</sup> | <i>Arabidopsis</i>     | CC        | 1              |
| <i>Cdc20.4</i> <sup>113</sup> | <i>Arabidopsis</i>     | CC        | 3              |
| <i>Cdc20.5</i> <sup>113</sup> | <i>Arabidopsis</i>     | CC        | 3              |

|                               |                    |           |                 |
|-------------------------------|--------------------|-----------|-----------------|
| <i>CDC27A</i> <sup>114</sup>  | <i>Arabidopsis</i> | CC        | 2               |
| <i>CDC27B</i> <sup>114</sup>  | <i>Arabidopsis</i> | CC        | 3               |
| <i>CKII</i> <sup>115</sup>    | <i>Arabidopsis</i> | CC        | 4               |
| <i>CYC2</i> <sup>116</sup>    | <i>Arabidopsis</i> | CC        | 4               |
| <i>CYCB1;1</i> <sup>117</sup> | <i>Arabidopsis</i> | CC        | 2               |
| <i>CYCB2;2</i> <sup>117</sup> | <i>Arabidopsis</i> | CC        | 6               |
| <i>CYCD2;1</i> <sup>118</sup> | <i>Arabidopsis</i> | CC        | 2               |
| <i>CycD3</i> <sup>118</sup>   | <i>Arabidopsis</i> | CC        | 7               |
| <i>GIG1</i> <sup>119</sup>    | <i>Arabidopsis</i> | CC        | 0               |
| <i>UVI4</i> <sup>120</sup>    | <i>Arabidopsis</i> | CC        | 2               |
| <i>TAD1</i> <sup>121</sup>    | Rice               | CC        | 9               |
| <b>Sub total</b>              | <b>26 (25)</b>     | <b>CC</b> | <b>100 (91)</b> |
| <i>ABI3</i> <sup>122</sup>    | <i>Arabidopsis</i> | TF        | 2               |
| <i>AIL5</i> <sup>123</sup>    | <i>Arabidopsis</i> | TF        | 2               |
| <i>AIL6</i> <sup>123</sup>    | <i>Arabidopsis</i> | TF        | 9               |
| <i>AIL7</i> <sup>123</sup>    | <i>Arabidopsis</i> | TF        | 7               |
| <i>AN3</i> <sup>124</sup>     | <i>Arabidopsis</i> | TF        | 5               |
| <i>ANT</i> <sup>125</sup>     | <i>Arabidopsis</i> | TF        | 6               |
| <i>CAL</i> <sup>126</sup>     | <i>Arabidopsis</i> | TF        | 2               |
| <i>CUC1</i> <sup>127</sup>    | <i>Arabidopsis</i> | TF        | 6               |
| <i>CUC2</i> <sup>127</sup>    | <i>Arabidopsis</i> | TF        | 2               |
| <i>CUC3</i> <sup>127</sup>    | <i>Arabidopsis</i> | TF        | 4               |
| <i>GRF1</i> <sup>128</sup>    | <i>Arabidopsis</i> | TF        | 3               |
| <i>GRF3</i> <sup>129</sup>    | <i>Arabidopsis</i> | TF        | 5               |
| <i>GRF5</i> <sup>129</sup>    | <i>Arabidopsis</i> | TF        | 6               |
| <i>JAW</i> <sup>130</sup>     | <i>Arabidopsis</i> | TF        | 0               |
| <i>LAS</i> <sup>131</sup>     | <i>Arabidopsis</i> | TF        | 2               |
| <i>LFY</i> <sup>132</sup>     | <i>Arabidopsis</i> | TF        | 4               |
| <i>RAM1</i> <sup>133</sup>    | <i>Arabidopsis</i> | TF        | 3               |
| <i>RAX1</i> <sup>133</sup>    | <i>Arabidopsis</i> | TF        | 4               |
| <i>RAX2</i> <sup>133</sup>    | <i>Arabidopsis</i> | TF        | 4               |
| <i>RAX3</i> <sup>133</sup>    | <i>Arabidopsis</i> | TF        | 8               |
| <i>REV</i> <sup>134</sup>     | <i>Arabidopsis</i> | TF        | 6               |
| <i>TFL1</i> <sup>135</sup>    | <i>Arabidopsis</i> | TF        | 5               |
| <i>BA1</i> <sup>136</sup>     | Maize              | TF        | 5               |

|                              |                        |           |                 |
|------------------------------|------------------------|-----------|-----------------|
| <i>NAM</i> <sup>137</sup>    | <i>Petunia hybrida</i> | TF        | 2               |
| <i>LF</i> <sup>138</sup>     | <i>Pisum sativum</i>   | TF        | 17              |
| <i>MADS5</i> <sup>139</sup>  | <i>Rice</i>            | TF        | 16              |
| <i>MADS7</i> <sup>139</sup>  | <i>Rice</i>            | TF        | 15              |
| <i>MADS55</i> <sup>83</sup>  | <i>Rice</i>            | TF        | 0               |
| <i>MADS56</i> <sup>139</sup> | <i>Rice</i>            | TF        | 9               |
| <i>MADS57</i> <sup>140</sup> | <i>Rice</i>            | TF        | 9               |
| <i>MOC1</i> <sup>141</sup>   | <i>Rice</i>            | TF        | 0               |
| <i>OsLAX1</i> <sup>142</sup> | <i>Rice</i>            | TF        | 0               |
| <i>OsLAX2</i> <sup>142</sup> | <i>Rice</i>            | TF        | 0               |
| <i>PCF1</i> <sup>143</sup>   | <i>Rice</i>            | TF        | 0               |
| <i>PROG1</i> <sup>144</sup>  | <i>Rice</i>            | TF        | 0               |
| <i>Ls</i> <sup>145</sup>     | <i>Tomato</i>          | TF        | 2               |
| <i>SP</i> <sup>146</sup>     | <i>Tomato</i>          | TF        | 19              |
| <b>Sub total</b>             | <b>37 (22)</b>         | <b>TF</b> | <b>189 (95)</b> |
| <i>AG</i> <sup>147</sup>     | <i>Arabidopsis</i>     | Other     | 6               |
| <i>API</i> <sup>148</sup>    | <i>Arabidopsis</i>     | Other     | 6               |
| <i>AP3</i> <sup>149</sup>    | <i>Arabidopsis</i>     | Other     | 4               |
| <i>ASK1</i> <sup>150</sup>   | <i>Arabidopsis</i>     | Other     | 3               |
| <i>CNA</i> <sup>151</sup>    | <i>Arabidopsis</i>     | Other     | 2               |
| <i>EMF1</i> <sup>152</sup>   | <i>Arabidopsis</i>     | Other     | 4               |
| <i>ER</i> <sup>153</sup>     | <i>Arabidopsis</i>     | Other     | 3               |
| <i>ERA1</i> <sup>154</sup>   | <i>Arabidopsis</i>     | Other     | 3               |
| <i>LOB</i> <sup>155</sup>    | <i>Arabidopsis</i>     | Other     | 4               |
| <i>PHAB</i> <sup>156</sup>   | <i>Arabidopsis</i>     | Other     | 3               |
| <i>PHAV</i> <sup>156</sup>   | <i>Arabidopsis</i>     | Other     | 2               |
| <i>PNH</i> <sup>157</sup>    | <i>Arabidopsis</i>     | Other     | 3               |
| <i>SEU</i> <sup>158</sup>    | <i>Arabidopsis</i>     | Other     | 0               |
| <i>SPL9</i> <sup>159</sup>   | <i>Arabidopsis</i>     | Other     | 4               |
| <i>SPS1</i> <sup>160</sup>   | <i>Arabidopsis</i>     | Other     | 3               |
| <i>STIP</i> <sup>161</sup>   | <i>Arabidopsis</i>     | Other     | 4               |
| <i>SYD</i> <sup>162</sup>    | <i>Arabidopsis</i>     | Other     | 0               |
| <i>FEA2</i> <sup>163</sup>   | <i>Maize</i>           | Other     | 0               |
| <i>RA1</i> <sup>164</sup>    | <i>Maize</i>           | Other     | 0               |
| <i>RA2</i> <sup>165</sup>    | <i>Maize</i>           | Other     | 0               |

|                               |                  |              |                   |
|-------------------------------|------------------|--------------|-------------------|
| <i>RA3</i> <sup>166</sup>     | Maize            | Other        | 20                |
| <i>TDI</i> <sup>167</sup>     | Maize            | Other        | 3                 |
| <i>APO1</i> <sup>168</sup>    | Rice             | Other        | 0                 |
| <i>APO2</i> <sup>169</sup>    | Rice             | Other        | 2                 |
| <i>DEP1</i> <sup>170</sup>    | Rice             | Other        | 0                 |
| <i>FONI</i> <sup>171</sup>    | Rice             | Other        | 10                |
| <i>FON4</i> <sup>172</sup>    | Rice             | Other        | 0                 |
| <i>FZP</i> <sup>173</sup>     | Rice             | Other        | 0                 |
| <i>IPAI</i> <sup>174</sup>    | Rice             | Other        | 0                 |
| <i>LAI</i> <sup>175</sup>     | Rice             | Other        | 0                 |
| <i>LPAI</i> <sup>176</sup>    | Rice             | Other        | 0                 |
| <i>MST4</i> <sup>139</sup>    | Rice             | Other        | 4                 |
| <i>NYC3</i> <sup>177</sup>    | Rice             | Other        | 4                 |
| <i>OGR1</i> <sup>178</sup>    | Rice             | Other        | 2                 |
| <i>OsDW3</i> <sup>26</sup>    | Rice             | Other        | 4                 |
| <i>OSHI</i> <sup>179</sup>    | Rice             | Other        | 4                 |
| <i>OsSPL14</i> <sup>180</sup> | Rice             | Other        | 0                 |
| <i>SPI</i> <sup>146</sup>     | Rice             | Other        | 3                 |
| <i>Spk(t)</i> <sup>181</sup>  | Rice             | Other        | 8                 |
| <i>TAC1</i> <sup>182</sup>    | Rice             | Other        | 0                 |
| <i>TAWI</i> <sup>183</sup>    | Rice             | Other        | 9                 |
| <i>WFP</i> <sup>174</sup>     | Rice             | Other        | 0                 |
| <b>Sub total</b>              | <b>42 (17)</b>   | <b>Other</b> | <b>127 (54)</b>   |
| <b>Total</b>                  | <b>256 (163)</b> |              | <b>1080 (672)</b> |

## References

1. Ulmasov, T., Hagen, G. & Guilfoyle, T. J. *ARF1*, a transcription factor that binds to auxin response elements. *Science* **276**, 1865-1868 (1997).
2. Okushima, Y. *et al.* Functional genomic analysis of the *AUXIN RESPONSE FACTOR* gene family members in *Arabidopsis thaliana*: unique and overlapping



- functions of *ARF7* and *ARF19*. *Plant Cell* **17**, 444-463 (2005).
3. Hu, Y., Xie, Q. & Chua, N.H. The Arabidopsis auxin-inducible gene *ARGOS* controls lateral organ size. *Plant Cell* **15**, 1951-1961 (2003).
  4. Bouchard, R. *et al.* Immunophilin-like *TWISTED DWARF1* modulates auxin efflux activities of Arabidopsis P-glycoproteins. *J. Biol. Chem.* **281**, 30603-30612 (2006).
  5. Terasaka, K. *et al.* *PGP4*, an ATP binding cassette P-glycoprotein, catalyzes auxin transport in *Arabidopsis thaliana* roots. *Plant Cell* **17**, 2922-2939 (2005).
  6. Bennett, M. J. *et al.* Arabidopsis *AUX1* gene: a permease-like regulator of root gravitropism. *Science* **273**, 948-950 (1996).
  7. Li, J. *et al.* Arabidopsis H<sup>+</sup>-PPase AVP1 regulates auxin-mediated organ development. *Science* **310**, 121-125 (2005).
  8. Leyser, H. O. *et al.* Arabidopsis auxin-resistance gene *AXR1* encodes a protein related to ubiquitin-activating enzyme E1. *Nature* **364**, 161-164 (1993).
  9. Nagpal, P. *et al.* *AXR2* encodes a member of the Aux/IAA protein family. *Plant Physiol.* **123**, 563-574 (2000).
  10. Leyser, H., Pickett, F. B., Dharmasiri, S. & Estelle, M. Mutations in the *AXR3* gene of Arabidopsis result in altered auxin response including ectopic expression from the SAUR-AC1 promoter. *Plant J.* **10**, 403-413 (1996).
  11. Dai, Y. *et al.* Increased expression of *MAP KINASE KINASE7* causes deficiency in polar auxin transport and leads to plant architectural abnormality in Arabidopsis. *Plant Cell* **18**, 308-320 (2006).
  12. Cui, X. *et al.* The *BUD2* mutation affects plant architecture through altering

- cytokinin and auxin responses in Arabidopsis. *Cell Res.* **20**, 576-586 (2010).
13. Fukaki, H., Tameda, S., Masuda, H. & Tasaka, M. Lateral root formation is blocked by a gain-of-function mutation in the *SOLITARY-ROOT/IAA14* gene of Arabidopsis. *Plant J.* **29**, 153-168 (2002).
  14. Reed, J. W. Roles and activities of Aux/IAA proteins in Arabidopsis. *Trends Plant Sci.* **6**, 420-425 (2001).
  15. Rogg, L. E., Lasswell, J. & Bartel, B. A gain-of-function mutation in *IAA28* suppresses lateral root development. *Plant Cell* **13**, 465-480 (2001).
  16. Tian, Q. & Reed, J. Control of auxin-regulated root development by the Arabidopsis thaliana *SHY2/IAA3* gene. *Development* **126**, 711-721 (1999).
  17. Kim, B. C., Soh, M. S., Kang, B. J., Furuya, M. & Nam, H. G. Two dominant photomorphogenic mutations of *Arabidopsis thaliana* identified as suppressor mutations of *hy2*. *Plant J.* **9**, 441-456 (1996).
  18. Wang, H. *et al.* The tomato Aux/IAA transcription factor *IAA9* is involved in fruit development and leaf morphogenesis. *Plant Cell* **17**, 2676-2692 (2005).
  19. Parry, G. *et al.* Novel auxin transport inhibitors phenocopy the auxin influx carrier mutation *aux1*. *Plant J.* **25**, 399-406 (2001).
  20. Bögre, L., Ökrész, L., Henriques, R. & Anthony, R. G. Growth signalling pathways in Arabidopsis and the AGC protein kinases. *Trends Plant Sci.* **8**, 424-431 (2003).
  21. Petrášek, J. *et al.* PIN proteins perform a rate-limiting function in cellular auxin efflux. *Science* **312**, 914-918 (2006).

22. Müller, A. *et al.* AtPIN2 defines a locus of Arabidopsis for root gravitropism control. *EMBO J.* **17**, 6903-6911 (1998).
23. Friml, J. *et al.* Efflux-dependent auxin gradients establish the apical-basal axis of Arabidopsis. *Nature* **426**, 147-153 (2003).
24. Kepinski, S. & Leyser, O. The Arabidopsis F-box protein TIR1 is an auxin receptor. *Nature* **435**, 446-451 (2005).
25. Yang, P. *et al.* Ubiquitin C-terminal hydrolases 1 and 2 affect shoot architecture in Arabidopsis. *Plant J.* **51**, 441-457 (2007).
26. Multani, D. S. *et al.* Loss of an MDR transporter in compact stalks of maize *br2* and sorghum *dw3* mutants. *Science* **302**, 81-84 (2003).
27. Napoli, C. Highly branched phenotype of the petunia *dad1-1* mutant is reversed by grafting. *Plant Physiol.* **111**, 27-37 (1996).
28. Arite, T. *et al.* DWARF10, an RMS1/MAX4/DAD1 ortholog, controls lateral bud outgrowth in rice. *Plant J.* **51**, 1019-1029 (2007).
29. Meng, Y. *et al.* Genome-wide survey of rice microRNAs and microRNA-target pairs in the root of a novel auxin-resistant mutant. *Planta* **230**, 883-898 (2009).
30. Hill, J. R. & Morris, D. R. Cell-specific translational regulation of S-adenosylmethionine decarboxylase mRNA. Dependence on translation and coding capacity of the cis-acting upstream open reading frame. *J. Biol. Chem.* **268**, 726-731 (1993).
31. Nishimura, C. *et al.* Histidine kinase homologs that act as cytokinin receptors possess overlapping functions in the regulation of shoot and root growth in

- Arabidopsis. *Plant Cell* **16**, 1365-1377 (2004).
32. Helliwell, C. A. *et al.* The Arabidopsis AMP1 gene encodes a putative glutamate carboxypeptidase. *Plant Cell* **13**, 2115-2125 (2001).
  33. Hwang, I. & Sheen, J. Two-component circuitry in Arabidopsis cytokinin signal transduction. *Nature* **413**, 383-389 (2001).
  34. Jasinski, S. *et al.* KNOX action in Arabidopsis is mediated by coordinate regulation of cytokinin and gibberellin activities. *Curr. Biol.* **15**, 1560-1565 (2005).
  35. Yanai, O. *et al.* Arabidopsis KNOXI proteins activate cytokinin biosynthesis. *Curr. Biol.* **15**, 1566-1571 (2005).
  36. Werner, T., Motyka, V., Strnad, M. & Schmülling, T. Regulation of plant growth by cytokinin. *Proc. Natl. Acad. Sci. U. S. A.* **98**, 10487-10492 (2001).
  37. Clark, S. E., Williams, R. W. & Meyerowitz, E. M. The *CLAVATA1* gene encodes a putative receptor kinase that controls shoot and floral meristem size in Arabidopsis. *Cell* **89**, 575-585 (1997).
  38. Kayes, J. M. & Clark, S. E. *CLAVATA2*, a regulator of meristem and organ development in Arabidopsis. *Development* **125**, 3843-3851 (1998).
  39. Fletcher, J. C., Brand, U., Running, M. P., Simon, R. & Meyerowitz, E. M. Signaling of cell fate decisions by *CLAVATA3* in Arabidopsis shoot meristems. *Science* **283**, 1911-1914 (1999).
  40. Rupp, H. M., Frank, M., Werner, T., Strnad, M. & Schmülling, T. Increased steady state mRNA levels of the *STM* and *KNAT1* homeobox genes in cytokinin overproducing *Arabidopsis thaliana* indicate a role for cytokinins in the shoot

- apical meristem. *Plant J.* **18**, 557-563 (1999).
41. Long, J. A., Moan, E. I., Medford, J. I. & Barton, M. K. A member of the KNOTTED class of homeodomain proteins encoded by the *STM* gene of *Arabidopsis*. *Nature* **379**, 66-69 (1996).
  42. Mayer, K. F. *et al.* Role of *WUSCHEL* in regulating stem cell fate in the *Arabidopsis* shoot meristem. *Cell* **95**, 805-815 (1998).
  43. Kurakawa, T. *et al.* Direct control of shoot meristem activity by a cytokinin-activating enzyme. *Nature* **445**, 652-655 (2007).
  44. Ashikari, M. *et al.* Cytokinin oxidase regulates rice grain production. *Science* **309**, 741-745 (2005).
  45. Klahre, U. *et al.* The *Arabidopsis* *DIMINUTO/DWARF1* gene encodes a protein involved in steroid synthesis. *Plant Cell* **10**, 1677-1690 (1998).
  46. Plackett, A. R. *et al.* Analysis of the developmental roles of the *Arabidopsis* gibberellin 20-oxidases demonstrates that *GA20ox1*, -2, and -3 are the dominant paralogs. *Plant Cell* **24**, 941-960 (2012).
  47. Hedden, P. & Phillips, A. L. Gibberellin metabolism: new insights revealed by the genes. *Trends Plant Sci.* **5**, 523-530 (2000).
  48. Olszewski, N., Sun, T.-p. & Gubler, F. Gibberellin signaling biosynthesis, catabolism, and response pathways. *Plant Cell* **14**, S61-S80 (2002).
  49. Peng, J. *et al.* The *Arabidopsis* *GAI* gene defines a signaling pathway that negatively regulates gibberellin responses. *Gene Dev.* **11**, 3194-3205 (1997).
  50. Komorisono, M. *et al.* Analysis of the rice mutant *dwarf* and *gladius leaf 1*.

- Aberrant katanin-mediated microtubule organization causes up-regulation of gibberellin biosynthetic genes independently of gibberellin signaling. *Plant Physiol.* **138**, 1982-1993 (2005).
51. Silverstone, A. L., Mak, P. Y. A., Martinez, E. C. & Sun, T. The new *RGA* locus encodes a negative regulator of gibberellin response in *Arabidopsis thaliana*. *Genetics* **146**, 1087-1099 (1997).
  52. Wen, C. K. & Chang, C. *Arabidopsis RGL1* encodes a negative regulator of gibberellin responses. *Plant Cell* **14**, 87-100 (2002).
  53. Fridborg, I., Kuusk, S., Moritz, T. & Sundberg, E. The *Arabidopsis* dwarf mutant *shi* exhibits reduced gibberellin responses conferred by overexpression of a new putative zinc finger protein. *Plant Cell* **11**, 1019-1031 (1999).
  54. Steber, C. M., Cooney, S. E. & McCourt, P. Isolation of the GA-response mutant *sly1* as a suppressor of *ABII-1* in *Arabidopsis thaliana*. *Genetics* **149**, 509-521 (1998).
  55. Jacobsen, S. E. & Olszewski, N. E. Mutations at the *SPINDLY* locus of *Arabidopsis* alter gibberellin signal transduction. *Plant Cell* **5**, 887-896 (1993).
  56. Winkler, R. & Freeling, M. Analysis of the autonomy of maize *Dwarf1* action in genetic mosaics. *J. Hered.* **85**, 377-380 (1994).
  57. Amador, V., Monte, E., García-Martínez, J.L. & Prat, S. Gibberellins signal nuclear import of PHOR1, a photoperiod-responsive protein with homology to *Drosophila* armadillo. *Cell* **106**, 343-354 (2001).
  58. Zhang, M. *et al.* *Brittle Culm 12*, a dual-targeting kinesin-4 protein, controls

- cell-cycle progression and wall properties in rice. *Plant J.* **63**, 312-328 (2010).
59. Ashikari, M., Wu, J., Yano, M., Sasaki, T. & Yoshimura, A. Rice gibberellin-insensitive dwarf mutant gene *Dwarf 1* encodes the  $\alpha$ -subunit of GTP-binding protein. *Proc. Natl. Acad. Sci. U. S. A.* **96**, 10284-10289 (1999).
60. Li, W. *et al.* Identification and characterization of *dwarf 62*, a loss-of-function mutation in *DLT/OsGRAS-32* affecting gibberellin metabolism in rice. *Planta* **232**, 1383-1396 (2010).
61. Luo, A. *et al.* *EUI1*, encoding a putative cytochrome P450 monooxygenase, regulates internode elongation by modulating gibberellin responses in rice. *Plant Cell Physiol.* **47**, 181-191 (2006).
62. Wang, L. *et al.* *OsGSRI* is involved in crosstalk between gibberellins and brassinosteroids in rice. *Plant J.* **57**, 498-510 (2009).
63. Ueguchi-Tanaka, M. *et al.* *GIBBERELLIN INSENSITIVE DWARF1* encodes a soluble receptor for gibberellin. *Nature* **437**, 693-698 (2005).
64. Gomi, K. *et al.* *GID2*, an F-box subunit of the SCF E3 complex, specifically interacts with phosphorylated *SLR1* protein and regulates the gibberellin-dependent degradation of *SLR1* in rice. *Plant J.* **37**, 626-634 (2004).
65. Sakamoto, T. *et al.* Expression of a gibberellin 2-oxidase gene around the shoot apex is related to phase transition in rice. *Plant Physiol.* **125**, 1508-1516 (2001).
66. Monna, L. *et al.* Positional cloning of rice semidwarfing gene, *sd-1*: rice “green revolution gene” encodes a mutant enzyme involved in gibberellin synthesis. *DNA Res.* **9**, 11-17 (2002).

67. Peng, J. *et al.* 'Green revolution' genes encode mutant gibberellin response modulators. *Nature* **400**, 256-260 (1999).
68. Hu, Y., Poh, H. M. & Chua, N. H. The Arabidopsis *ARGOS-LIKE* gene regulates cell expansion during organ growth. *Plant J.* **47**, 1-9 (2006).
69. Li, J. *et al.* BAK1, an Arabidopsis LRR receptor-like protein kinase, Interacts with *BRI1* and modulates brassinosteroid signaling. *Cell* **110**, 213-222 (2002).
70. Yin, Y. *et al.* *BES1* accumulates in the nucleus in response to brassinosteroids to regulate gene expression and promote stem elongation. *Cell* **109**, 181-191 (2002).
71. Zhao, J. *et al.* Two putative BIN2 substrates are nuclear components of brassinosteroid signaling. *Plant Physiol.* **130**, 1221-1229 (2002).
72. Wang, X. & Chory, J. Brassinosteroids regulate dissociation of *BKII*, a negative regulator of *BRI1* signaling, from the plasma membrane. *Science* **313**, 1118-1122 (2006).
73. Wang, Z.Y. *et al.* Nuclear-localized *BZR1* mediates brassinosteroid-induced growth and feedback suppression of brassinosteroid biosynthesis. *Dev. Cell* **2**, 505-513 (2002).
74. Choe, S. *et al.* Overexpression of *DWARF4* in the brassinosteroid biosynthetic pathway results in increased vegetative growth and seed yield in Arabidopsis. *Plant J.* **26**, 573-582 (2001).
75. Bolle, C. The role of GRAS proteins in plant signal transduction and development. *Planta* **218**, 683-692 (2004).
76. Tanaka, A. *et al.* *BRASSINOSTEROID UPREGULATED1*, encoding a



- helix-loop-helix protein, is a novel gene involved in brassinosteroid signaling and controls bending of the lamina joint in rice. *Plant Physiol.* **151**, 669-680 (2009).
77. Tanabe, S. *et al.* A novel cytochrome P450 is implicated in brassinosteroid biosynthesis via the characterization of a rice dwarf mutant, *dwarf11*, with reduced seed length. *Plant Cell* **17**, 776-790 (2005).
78. Sakamoto, T. *et al.* Erect leaves caused by brassinosteroid deficiency increase biomass production and grain yield in rice. *Nat. Biotechnol.* **24**, 105-109 (2006).
79. Hong, Z. *et al.* A rice brassinosteroid-deficient mutant, *ebisu dwarf (d2)*, is caused by a loss of function of a new member of cytochrome P450. *Plant Cell* **15**, 2900-2910 (2003).
80. Ning, J., Zhang, B., Wang, N., Zhou, Y. & Xiong, L. Increased leaf angle1, a Raf-like MAPKKK that interacts with a nuclear protein family, regulates mechanical tissue formation in the lamina joint of rice. *Plant Cell* **23**, 4334-4347 (2011).
81. Zhang, L.-Y. *et al.* Antagonistic HLH/bHLH transcription factors mediate brassinosteroid regulation of cell elongation and plant development in rice and *Arabidopsis*. *Plant Cell* **21**, 3767-3780 (2009).
82. Zhang, C. *et al.* Dynamics of brassinosteroid response modulated by negative regulator *LIC* in rice. *PLoS Genet.* **8**, e1002686 (2012).
83. Lee, S., Choi, S. C. & An, G. Rice SVP-group MADS-box proteins, OsMADS22 and OsMADS55, are negative regulators of brassinosteroid responses. *Plant J.* **54**, 93-105 (2008).

84. Duan, K. *et al.* A brassinolide-suppressed rice MADS-box transcription factor, *OsMDP1*, has a negative regulatory role in BR signaling. *Plant J.* **47**, 519-531 (2006).
85. Je, B. I. *et al.* RAV-Like1 maintains brassinosteroid homeostasis via the coordinated activation of *BR11* and biosynthetic genes in rice. *Plant Cell* **22**, 1777-1791 (2010).
86. Hu, X. *et al.* The U-box E3 ubiquitin ligase TUD1 functions with a heterotrimeric G  $\alpha$  subunit to regulate brassinosteroid-mediated growth in rice. *PLoS Genet.* **9**, e1003391 (2013).
87. Jiang, Y. *et al.* *XIAO* is involved in the control of organ size by contributing to the regulation of signaling and homeostasis of brassinosteroids and cell cycling in rice. *Plant J.* **70**, 398-408 (2012).
88. Aguilar-Martínez, J. A., Poza-Carrión, C. & Cubas, P. Arabidopsis *BRANCHED1* acts as an integrator of branching signals within axillary buds. *Plant Cell* **19**, 458-472 (2007).
89. Rouse, D., Mackay, P., Stirnberg, P., Estelle, M. & Leyser, O. Changes in auxin response from mutations in an AUX/IAA gene. *Science* **279**, 1371-1373 (1998).
90. Lazar, G. & Goodman, H. M. *MAX1*, a regulator of the flavonoid pathway, controls vegetative axillary bud outgrowth in Arabidopsis. *Proc. Natl. Acad. Sci. U. S. A.* **103**, 472-476 (2006).
91. Stirnberg, P., Furner, I. J. & Ottoline Leyser, H. MAX2 participates in an SCF complex which acts locally at the node to suppress shoot branching. *Plant J.* **50**,

- 80-94 (2007).
92. Booker, J. *et al.* MAX3/CCD7 is a carotenoid cleavage dioxygenase required for the synthesis of a novel plant signaling molecule. *Curr. Biol.* **14**, 1232-1238 (2004).
  93. Sorefan, K. *et al.* MAX4 and RMS1 are orthologous dioxygenase-like genes that regulate shoot branching in Arabidopsis and pea. *Gene Dev.* **17**, 1469-1474 (2003).
  94. Doebley, J., Stec, A. & Hubbard, L. The evolution of apical dominance in maize. *Nature* **386**, 485-488 (1997).
  95. Hamiaux, C. *et al.* DAD2 is an  $\alpha/\beta$  hydrolase likely to be involved in the perception of the plant branching hormone, strigolactone. *Curr. Biol.* **22**, 2032-2036 (2012).
  96. Foo, E. *et al.* The branching gene *RAMOSUS1* mediates interactions among two novel signals and auxin in pea. *Plant Cell* **17**, 464-474 (2005).
  97. Arite, T. *et al.* *d14*, a strigolactone-insensitive mutant of rice, shows an accelerated outgrowth of tillers. *Plant Cell Physiol.* **50**, 1416-1424 (2009).
  98. Zou, J. *et al.* The rice *HIGH-TILLERING DWARF1* encoding an ortholog of Arabidopsis *MAX3* is required for negative regulation of the outgrowth of axillary buds. *Plant J.* **48**, 687-698 (2006).
  99. Lin, H. *et al.* *DWARF27*, an iron-containing protein required for the biosynthesis of strigolactones, regulates rice tiller bud outgrowth. *Plant Cell* **21**, 1512-1525 (2009).
  100. Jiang, L. *et al.* *DWARF 53* acts as a repressor of strigolactone signalling in rice.

- Nature* **504**, 401-405 (2013).
101. Zhou, F. *et al.* D14-SCFD3-dependent degradation of *D53* regulates strigolactone signalling. *Nature* **504**, 406–410 (2013).
  102. Gao, Z. *et al.* *Dwarf 88*, a novel putative esterase gene affecting architecture of rice plant. *Plant Mol. Biol.* **71**, 265-276 (2009).
  103. Liu, W. *et al.* Identification and characterization of *HTD2*: a novel gene negatively regulating tiller bud outgrowth in rice. *Planta* **230**, 649-658 (2009).
  104. Takeda, T. *et al.* The *OsTB1* gene negatively regulates lateral branching in rice. *Plant J.* **33**, 513-520 (2003).
  105. Cardoso, C. *et al.* Natural variation of rice strigolactone biosynthesis is associated with the deletion of two *MAX1* orthologs. *Proc. Natl. Acad. Sci. U. S. A.* **111**, 2379-2384 (2014).
  106. Eloy, N. B. *et al.* The APC/C subunit 10 plays an essential role in cell proliferation during leaf development. *Plant J.* **68**, 351-363 (2011).
  107. Zheng, B., Chen, X. & McCormick, S. The anaphase-promoting complex is a dual integrator that regulates both MicroRNA-mediated transcriptional regulation of cyclin B1 and degradation of Cyclin B1 during Arabidopsis male gametophyte development. *Plant Cell* **23**, 1033-1046 (2011).
  108. Capron, A. *et al.* The Arabidopsis anaphase-promoting complex or cyclosome: molecular and genetic characterization of the APC2 subunit. *Plant Cell* **15**, 2370-2382 (2003).
  109. Wang, Y. *et al.* The Arabidopsis APC4 subunit of the anaphase-promoting

complex/cyclosome (APC/C) is critical for both female gametogenesis and embryogenesis. *Plant J.* **69**, 227-240 (2012).

110. Kwee, H. S. & Sundaresan, V. The *NOMEGA* gene required for female gametophyte development encodes the putative *APC6/CDC16* component of the Anaphase Promoting Complex in Arabidopsis. *Plant J.* **36**, 853-866 (2003).
111. Waters, M. T., Brewer, P. B., Bussell, J. D., Smith, S. M. & Beveridge, C. A. The Arabidopsis ortholog of rice *DWARF27* acts upstream of *MAX1* in the control of plant development by strigolactones. *Plant Physiol.* **159**, 1073-1085 (2012).
112. Vinardell, J. M. *et al.* Endoreduplication mediated by the anaphase-promoting complex activator *CCS52A* is required for symbiotic cell differentiation in *Medicago truncatula* nodules. *Plant Cell* **15**, 2093-2105 (2003).
113. Kevei, Z. *et al.* Conserved *CDC20* cell cycle functions are carried out by two of the five isoforms in *Arabidopsis thaliana*. *PLoS ONE* **6**, e20618 (2011).
114. Blilou, I. *et al.* The Arabidopsis *HOBBIT* gene encodes a *CDC27* homolog that links the Plant Cell cycle to progression of cell differentiation. *Gene Dev.* **16**, 2566-2575 (2002).
115. Deng, Y. *et al.* Arabidopsis histidine kinase *CKII* acts upstream of histidine phosphotransfer proteins to regulate female gametophyte development and vegetative growth. *Plant Cell* **22**, 1232-1248 (2010).
116. Day, I. S. & Reddy, A. Cloning of a family of cyclins from *Arabidopsis thaliana*. *Biochimica et Biophysica Acta (BBA)-Gene Structure and Expression* **1218**, 115-118 (1994).

117. Lee, J. *et al.* Cell cycle function of a rice B2-type cyclin interacting with a B-type cyclin-dependent kinase. *Plant J.* **34**, 417-425 (2003).
118. Cockcroft, C. E., den Boer, B. G., Healy, J. S. & Murray, J. A. *Cyclin D* control of growth rate in plants. *Nature* **405**, 575-579 (2000).
119. Iwata, E. *et al.* *GIGAS CELL1*, a novel negative regulator of the anaphase-promoting complex/cyclosome, is required for proper mitotic progression and cell fate determination in Arabidopsis. *Plant Cell* **23**, 4382-4393 (2011).
120. Heyman, J. *et al.* Arabidopsis *ULTRAVIOLET-B-INSENSITIVE4* maintains cell division activity by temporal inhibition of the anaphase-promoting complex/cyclosome. *Plant Cell* **23**, 4394-4410 (2011).
121. Xu, C. *et al.* Degradation of *MONOCULM 1* by APC/CTAD1 regulates rice tillering. *Nature Commun.* **3**, 750 (2012).
122. Giraudat, J. *et al.* Isolation of the Arabidopsis *ABI3* gene by positional cloning. *Plant Cell* **4**, 1251-1261 (1992).
123. Nole-Wilson, S., Tranby, T. L. & Krizek, B. A. *AINTEGUMENTA-like (AIL)* genes are expressed in young tissues and may specify meristematic or division-competent states. *Plant Mol. Biol.* **57**, 613-628 (2005).
124. Kim, G. T. *et al.* The *ANGUSTIFOLIA* gene of Arabidopsis, a plant *CtBP* gene, regulates leaf-cell expansion, the arrangement of cortical microtubules in leaf cells and expression of a gene involved in cell-wall formation. *EMBO J.* **21**, 1267-1279 (2002).

125. Elliott, R. C. *et al.* *AINTEGUMENTA*, an *APETALA2-like* gene of Arabidopsis with pleiotropic roles in ovule development and floral organ growth. *Plant Cell* **8**, 155-168 (1996).
126. Purugganan, M. D. & Suddith, J. I. Molecular population genetics of the Arabidopsis *CAULIFLOWER* regulatory gene: nonneutral evolution and naturally occurring variation in floral homeotic function. *Proc. Natl. Acad. Sci. U. S. A.* **95**, 8130-8134 (1998).
127. Hibara, K. I., Takada, S. & Tasaka, M. *CUC1* gene activates the expression of SAM-related genes to induce adventitious shoot formation. *Plant J.* **36**, 687-696 (2003).
128. Kim, J. H. & Kende, H. A transcriptional coactivator, *AtGIF1*, is involved in regulating leaf growth and morphology in Arabidopsis. *Proc. Natl. Acad. Sci. U. S. A.* **101**, 13374-13379 (2004).
129. Kim, J. H., Choi, D. & Kende, H. The *AtGRF* family of putative transcription factors is involved in leaf and cotyledon growth in Arabidopsis. *Plant J.* **36**, 94-104 (2003).
130. Palatnik, J. F. *et al.* Control of leaf morphogenesis by microRNAs. *Nature* **425**, 257-263 (2003).
131. Greb, T. *et al.* Molecular analysis of the *LATERAL SUPPRESSOR* gene in Arabidopsis reveals a conserved control mechanism for axillary meristem formation. *Gene Dev.* **17**, 1175-1187 (2003).
132. Weigel, D., Alvarez, J., Smyth, D. R., Yanofsky, M. F. & Meyerowitz, E. M.

- LEAFY* controls floral meristem identity in Arabidopsis. *Cell* **69**, 843-859 (1992).
133. Keller, T., Abbott, J., Moritz, T. & Doerner, P. Arabidopsis *REGULATOR OF AXILLARY MERISTEMS1* controls a leaf axil stem cell niche and modulates vegetative development. *Plant Cell* **18**, 598-611 (2006).
134. Otsuga, D., DeGuzman, B., Prigge, M. J., Drews, G. N. & Clark, S. E. *REVOLUTA* regulates meristem initiation at lateral positions. *Plant J.* **25**, 223-236 (2001).
135. Shannon, S. & Meeks-Wagner, D. R. A mutation in the Arabidopsis *TFL1* gene affects inflorescence meristem development. *Plant Cell* **3**, 877-892 (1991).
136. Gallavotti, A. *et al.* The role of *barren stalk1* in the architecture of maize. *Nature* **432**, 630-635 (2004).
137. Souer, E., van Houwelingen, A., Kloos, D., Mol, J. & Koes, R. *The No Apical Meristem* gene of petunia is required for pattern formation in embryos and flowers and is expressed at meristem and primordia boundaries. *Cell* **85**, 159-170 (1996).
138. Weller, J. L., Reid, J. B., Taylor, S. A. & Murfet, I. C. The genetic control of flowering in pea. *Trends Plant Sci.* **2**, 412-418 (1997).
139. Lu, Z. *et al.* Genome-wide binding analysis of the transcription activator *IDEAL PLANT ARCHITECTURE1* reveals a complex network regulating rice plant architecture. *Plant Cell* **25**, 3743-3759 (2013).
140. Guo, S. *et al.* The interaction between *OsMADS57* and *OsTBI* modulates rice tillering via *DWARF14*. *Nature Commun.* **4**, 1566 (2013).
141. Li, X. *et al.* Control of tillering in rice. *Nature* **422**, 618-621 (2003).
142. Komatsu, M., Maekawa, M., Shimamoto, K. & Kyojuka, J. The *LAX1* and



- FRIZZY PANICLE 2* genes determine the inflorescence architecture of rice by controlling rachis-branch and spikelet development. *Dev. Biol.* **231**, 364-373 (2001).
143. Kosugi, S. & Ohashi, Y. *PCF1* and *PCF2* specifically bind to cis elements in the rice proliferating cell nuclear antigen gene. *Plant Cell* **9**, 1607-1619 (1997).
144. Jin, J. *et al.* Genetic control of rice plant architecture under domestication. *Nat. Genet.* **40**, 1365-1369 (2008).
145. Schumacher, K., Schmitt, T., Rossberg, M., Schmitz, G. & Theres, K. The *Lateral suppressor (Ls)* gene of tomato encodes a new member of the VHIID protein family. *Proc. Natl. Acad. Sci. U. S. A.* **96**, 290-295 (1999).
146. Pnueli, L. *et al.* The *SELF-PRUNING* gene of tomato regulates vegetative to reproductive switching of sympodial meristems and is the ortholog of *CEN* and *TFL1*. *Development* **125**, 1979-1989 (1998).
147. Mizukami, Y. & Ma, H. Ectopic expression of the floral homeotic gene *AGAMOUS* in transgenic Arabidopsis plants alters floral organ identity. *Cell* **71**, 119-131 (1992).
148. Peña, L. *et al.* Constitutive expression of Arabidopsis *LEAFY* or *APETALA1* genes in citrus reduces their generation time. *Nat. Biotechnol.* **19**, 263-267 (2001).
149. Riechmann, J. L., Krizek, B. A. & Meyerowitz, E. M. Dimerization specificity of Arabidopsis MADS domain homeotic proteins APETALA1, APETALA3, PISTILLATA, and AGAMOUS. *Proc. Natl. Acad. Sci. U. S. A.* **93**, 4793-4798 (1996).

150. Zhao, D., Yu, Q., Chen, M. & Ma, H. The *ASK1* gene regulates B function gene expression in cooperation with *UFO* and *LEAFY* in Arabidopsis. *Development* **128**, 2735-2746 (2001).
151. Williams, L. & Fletcher, J. C. Stem cell regulation in the Arabidopsis shoot apical meristem. *Curr. Opin. Plant Biol.* **8**, 582-586 (2005).
152. Aubert, D. *et al.* *EMF1*, a novel protein involved in the control of shoot architecture and flowering in Arabidopsis. *Plant Cell* **13**, 1865-1875 (2001).
153. Masle, J., Gilmore, S. R. & Farquhar, G. D. The *ERECTA* gene regulates plant transpiration efficiency in Arabidopsis. *Nature* **436**, 866-870 (2005).
154. Allen, G. J., Murata, Y., Chu, S. P., Nafisi, M. & Schroeder, J. I. Hypersensitivity of abscisic acid-induced cytosolic Calcium increases in the Arabidopsis farnesyltransferase mutant *era1-2*. *Plant Cell* **14**, 1649-1662 (2002).
155. Lin, W., Shuai, B. & Springer, P. S. The Arabidopsis LATERAL ORGAN BOUNDARIES–domain gene *ASYMMETRIC LEAVES2* functions in the repression of *KNOX* gene expression and in adaxial-abaxial patterning. *Plant Cell* **15**, 2241-2252 (2003).
156. McConnell, J. R. *et al.* Role of *PHABULOSA* and *PHAVOLUTA* in determining radial patterning in shoots. *Nature* **411**, 709-713 (2001).
157. McConnell, J. R. & Barton, M. K. Effect of mutations in the *PINHEAD* gene of Arabidopsis on the formation of shoot apical meristems. *Dev. Genet.* **16**, 358-366 (1995).
158. Ståldal, V., Sohlberg, J. J., Eklund, D. M., Ljung, K. & Sundberg, E. Auxin can act

- independently of *CRC*, *LUG*, *SEU*, *SPT* and *STY1* in style development but not apical-basal patterning of the Arabidopsis gynoecium. *New Phytol.* **180**, 798-808 (2008).
159. Schwarz, S., Grande, A. V., Bujdosó, N., Saedler, H. & Huijser, P. The microRNA regulated SBP-box genes *SPL9* and *SPL15* control shoot maturation in Arabidopsis. *Plant Mol. Biol.* **67**, 183-195 (2008).
160. Jun, L., Saiki, R., Tatsumi, K., Nakagawa, T. & Kawamukai, M. Identification and subcellular localization of two solanesyl diphosphate synthases from *Arabidopsis thaliana*. *Plant Cell Physiol.* **45**, 1882-1888 (2004).
161. Wu, X., Dabi, T. & Weigel, D. Requirement of homeobox gene *STIMPY WOX9* for Arabidopsis meristem growth and maintenance. *Curr. Biol.* **15**, 436-440 (2005).
162. Kwon, C. S., Chen, C. & Wagner, D. *WUSCHEL* is a primary target for transcriptional regulation by *SPLAYED* in dynamic control of stem cell fate in Arabidopsis. *Gene Dev.* **19**, 992-1003 (2005).
163. Taguchi-Shiobara, F., Yuan, Z., Hake, S. & Jackson, D. The *fasciated ear2* gene encodes a leucine-rich repeat receptor-like protein that regulates shoot meristem proliferation in maize. *Gene Dev.* **15**, 2755-2766 (2001).
164. Vollbrecht, E., Springer, P. S., Goh, L., Buckler IV, E. S. & Martienssen, R. Architecture of floral branch systems in maize and related grasses. *Nature* **436**, 1119-1126 (2005).
165. Bortiri, E. *et al.* *ramosa2* encodes a LATERAL ORGAN BOUNDARY domain protein that determines the fate of stem cells in branch meristems of maize. *Plant*

- Cell* **18**, 574-585 (2006).
166. Satoh-Nagasawa, N., Nagasawa, N., Malcomber, S., Sakai, H. & Jackson, D. A trehalose metabolic enzyme controls inflorescence architecture in maize. *Nature* **441**, 227-230 (2006).
167. Bommert, P. *et al.* *thick tassel dwarf1* encodes a putative maize ortholog of the Arabidopsis *CLAVATA1* leucine-rich repeat receptor-like kinase. *Development* **132**, 1235-1245 (2005).
168. Ikeda, K., Ito, M., Nagasawa, N., Kyojuka, J. & Nagato, Y. Rice *ABERRANT PANICLE ORGANIZATION 1*, encoding an F-box protein, regulates meristem fate. *Plant J.* **51**, 1030-1040 (2007).
169. Ikeda-Kawakatsu, K., Maekawa, M., Izawa, T., Itoh, J. I. & Nagato, Y. *ABERRANT PANICLE ORGANIZATION 2/RFL*, the rice ortholog of Arabidopsis *LEAFY*, suppresses the transition from inflorescence meristem to floral meristem through interaction with *APO1*. *Plant J.* **69**, 168-180 (2012).
170. Huang, X. *et al.* Natural variation at the *DEP1* locus enhances grain yield in rice. *Nat. Genet.* **41**, 494-497 (2009).
171. Suzaki, T. *et al.* The gene *FLORAL ORGAN NUMBER1* regulates floral meristem size in rice and encodes a leucine-rich repeat receptor kinase orthologous to Arabidopsis *CLAVATA1*. *Development* **131**, 5649-5657 (2004).
172. Chu, H. *et al.* The *FLORAL ORGAN NUMBER4* gene encoding a putative ortholog of Arabidopsis *CLAVATA3* regulates apical meristem size in rice. *Plant Physiol.* **142**, 1039-1052 (2006).

173. Komatsu, M., Chujo, A., Nagato, Y., Shimamoto, K. & Kyojuka, J. *FRIZZY PANICLE* is required to prevent the formation of axillary meristems and to establish floral meristem identity in rice spikelets. *Development* **130**, 3841-3850 (2003).
174. Jiao, Y. *et al.* Regulation of *OsSPL14* by *OsmiR156* defines ideal plant architecture in rice. *Nat. Genet.* **42**, 541-544 (2010).
175. Dong, Z. *et al.* Maize *LAZY1* mediates shoot gravitropism and inflorescence development through regulating auxin transport, auxin signaling, and light response. *Plant Physiol.* **163**, 1306-1322 (2013).
176. Wu, X., Tang, D., Li, M., Wang, K. & Cheng, Z. *Loose plant architecture1*, an INDETERMINATE DOMAIN protein involved in shoot gravitropism, regulates plant architecture in rice. *Plant Physiol.* **161**, 317-329 (2013).
177. Morita, R., Sato, Y., Masuda, Y., Nishimura, M. & Kusaba, M. Defect in non-yellow coloring 3, an  $\alpha/\beta$  hydrolase-fold family protein, causes a stay-green phenotype during leaf senescence in rice. *Plant J.* **59**, 940-952 (2009).
178. Kim, S. R. *et al.* Rice *OGR1* encodes a pentatricopeptide repeat-DYW protein and is essential for RNA editing in mitochondria. *Plant J.* **59**, 738-749 (2009).
179. Sato, Y. *et al.* A rice homeobox gene, *OSHI*, is expressed before organ differentiation in a specific region during early embryogenesis. *Proc. Natl. Acad. Sci. U. S. A.* **93**, 8117-8122 (1996).
180. Miura, K. *et al.* *OsSPL14* promotes panicle branching and higher grain productivity in rice. *Nat. Genet.* **42**, 545-549 (2010).

181. Miyata, M. *et al.* Fine scale and physical mapping of *Spk (t)* controlling spreading stub in rice. *Breeding Sci.* **55**, 237-239 (2005).
182. Yu, B. *et al.* *TAC1*, a major quantitative trait locus controlling tiller angle in rice. *Plant J.* **52**, 891-898 (2007).
183. Yoshida, A. *et al.* *TAWAWAI*, a regulator of rice inflorescence architecture, functions through the suppression of meristem phase transition. *Proc. Natl. Acad. Sci. U. S. A.* **110**, 767-772 (2013).

**Supplementary Table S7.** Physical positions of the SSR and SNP markers used in the HJ-DH population, and the fragments of homoeologous exchange identified in the genetic linkage map.

**Supplementary Table S8.** Homologous genes for plant architecture in *B. napus*, and their positions in the *B. napus* genetic linkage map.

**Supplementary Table S9.** Predicted candidate genes for 105 unique QTLs.

**Supplementary Table S10.** Three pleiotropic QTLs of PY major QTLs, and their candidate genes.

**Supplementary Table S11.** Detailed information of epistatic interaction loci-pairs for plant yield identified in four environments of the HJ-DH population.

**Supplementary Table S12.** Detailed information for 183 interaction loci-pairs that were repeatedly detected in two or more environments and their corresponding QTLs.

**Supplementary Table S13.** Conserved blocks that were located or overlapped on the epistatic interaction loci-pairs for plant yield identified in four environments.

**(Because of the large tables, the Supplementary Table S7-S13 were in the Supplementary Dataset)**

**Supplementary Table S14.** Primers used for cloning of the genomic DNA fragments of *Bna.A02.CLV2* (*BnaA02g12070D*), *Bna.C07.AHK4* (*BnaC07g21260D*), and *Bna.A09.SLY2* (*BnaA09g02870D*) gene in *Brassica napus*.

| <b>Gene</b>                                     | <b>Primer</b> | <b>Sequence (5'—3')</b> |
|-------------------------------------------------|---------------|-------------------------|
| <i>Bna.A02.CLV2</i><br>( <i>BnaA02g12070D</i> ) | CLV2_F        | ATGGTGAAGACTGCATATCT    |
|                                                 | CLV2_R        | TTAACCTTTGGTCTGGAGAA    |
| <i>Bna.C07.AHK4</i><br>( <i>BnaC07g21260D</i> ) | AHK4_F        | ATGTTCAATCCTTTCACAAC    |
|                                                 | AHK4_R        | TCAACTTTGGCTACATGACG    |
| <i>Bna.A09.SLY2</i><br>( <i>BnaA09g02870D</i> ) | SLY2_F        | ATGTCGAAGAAACGAATTGG    |
|                                                 | SLY2_R        | TCAGACGACGTTGACGGGCA    |



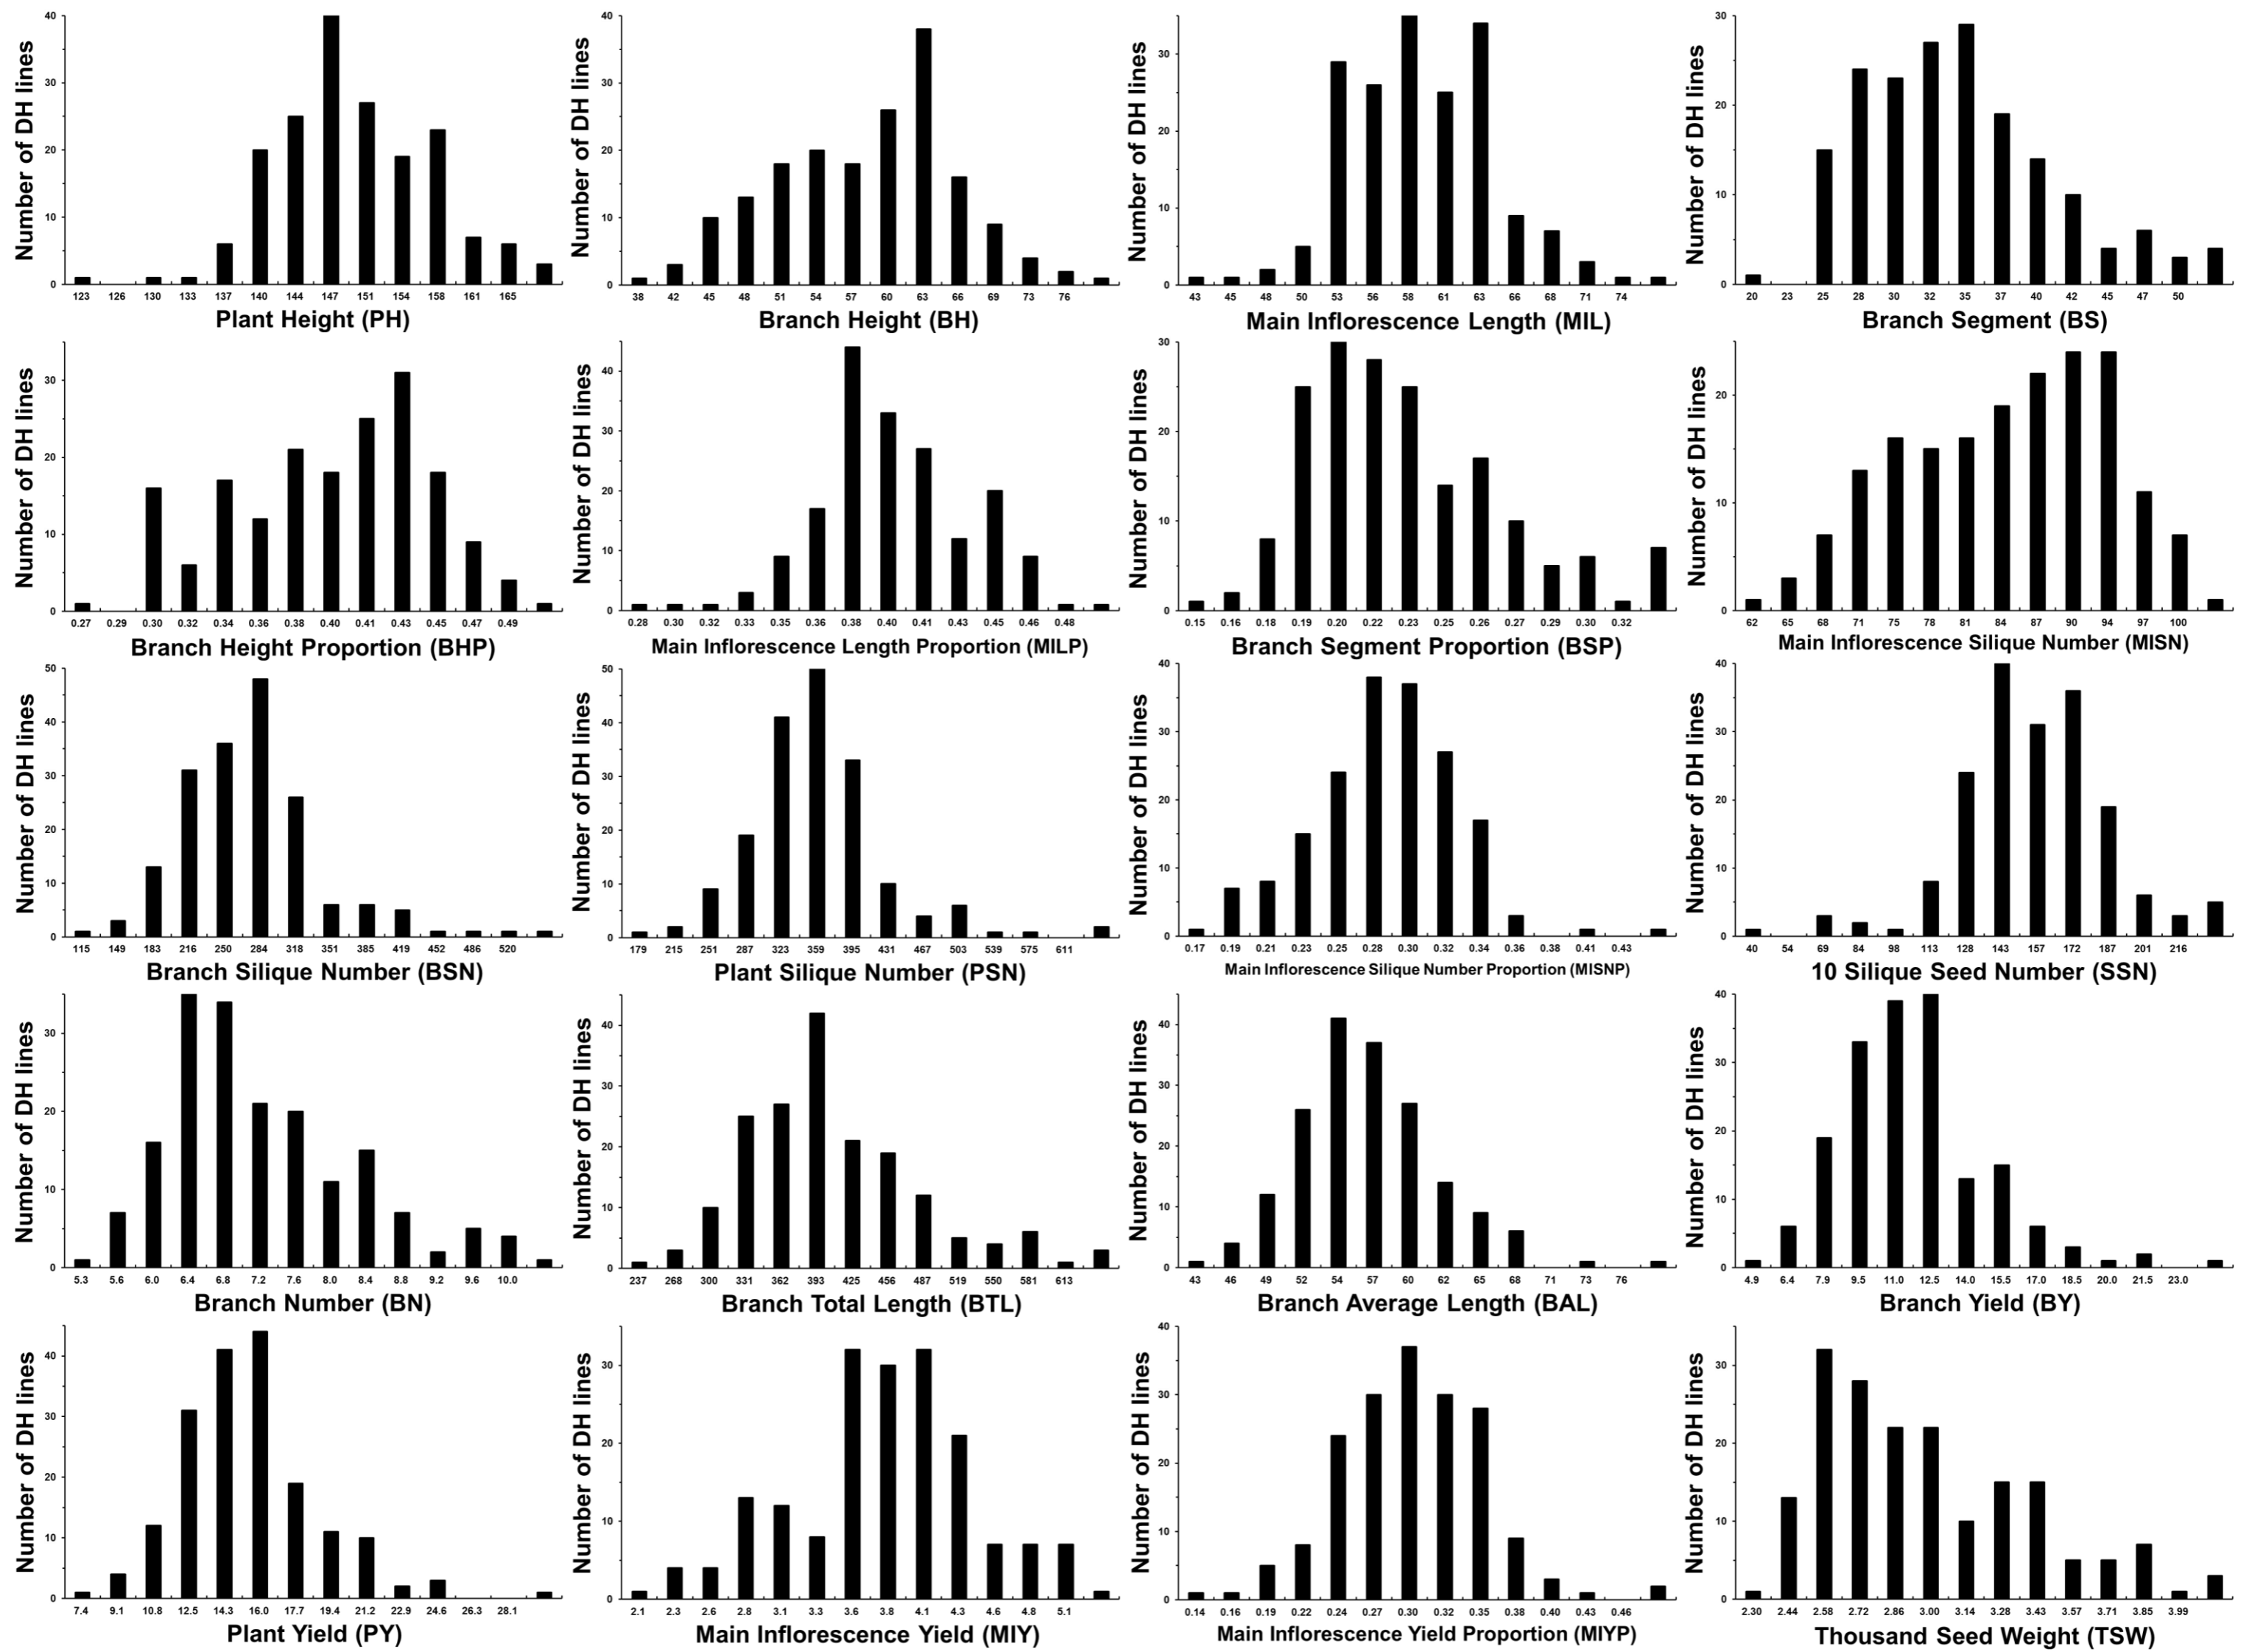

**Supplementary Figure S1.** Distribution of the 20 plant architecture and yield traits in the HJ\_DH population derived from the cross of Hua\_5 and J7005 in the year of 2009-2010 in Wuhan (WH09).

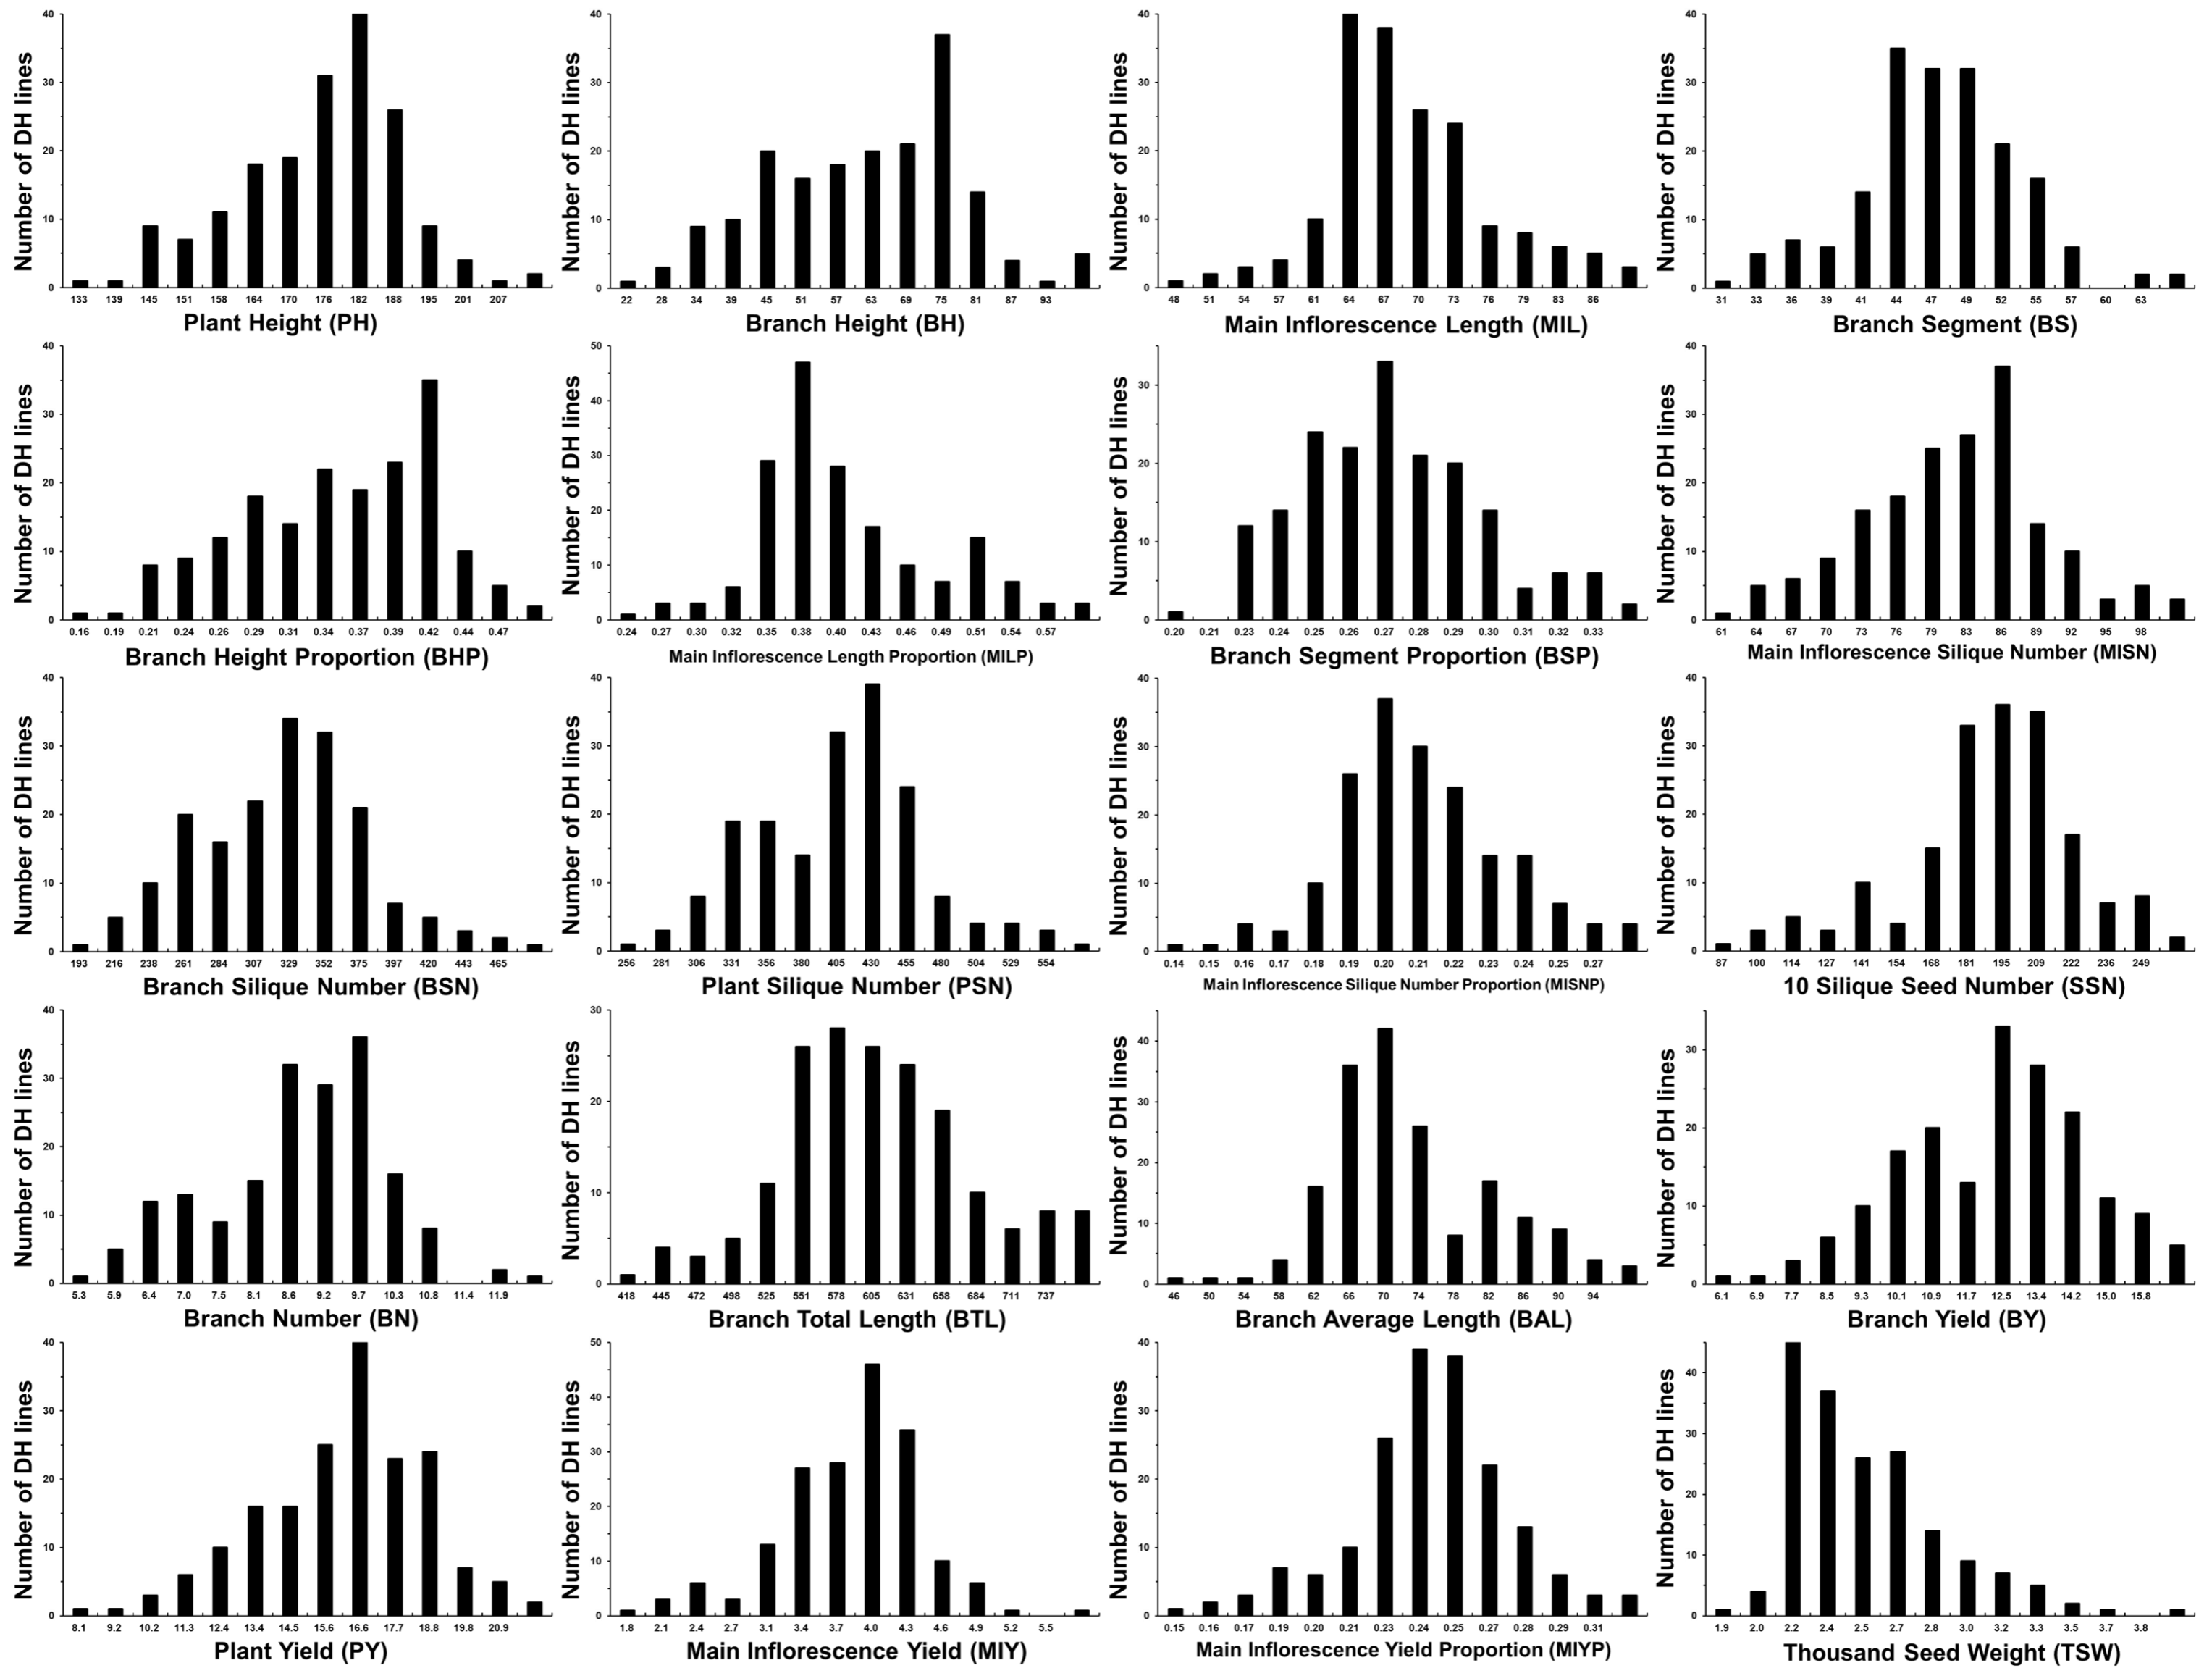

**Supplementary Figure S2.** Distribution of the 20 plant architecture and yield traits in the HJ\_DH population derived from the cross of Hua\_5 and J7005 in the year of 2010-2011 in Wuhan (WH10).

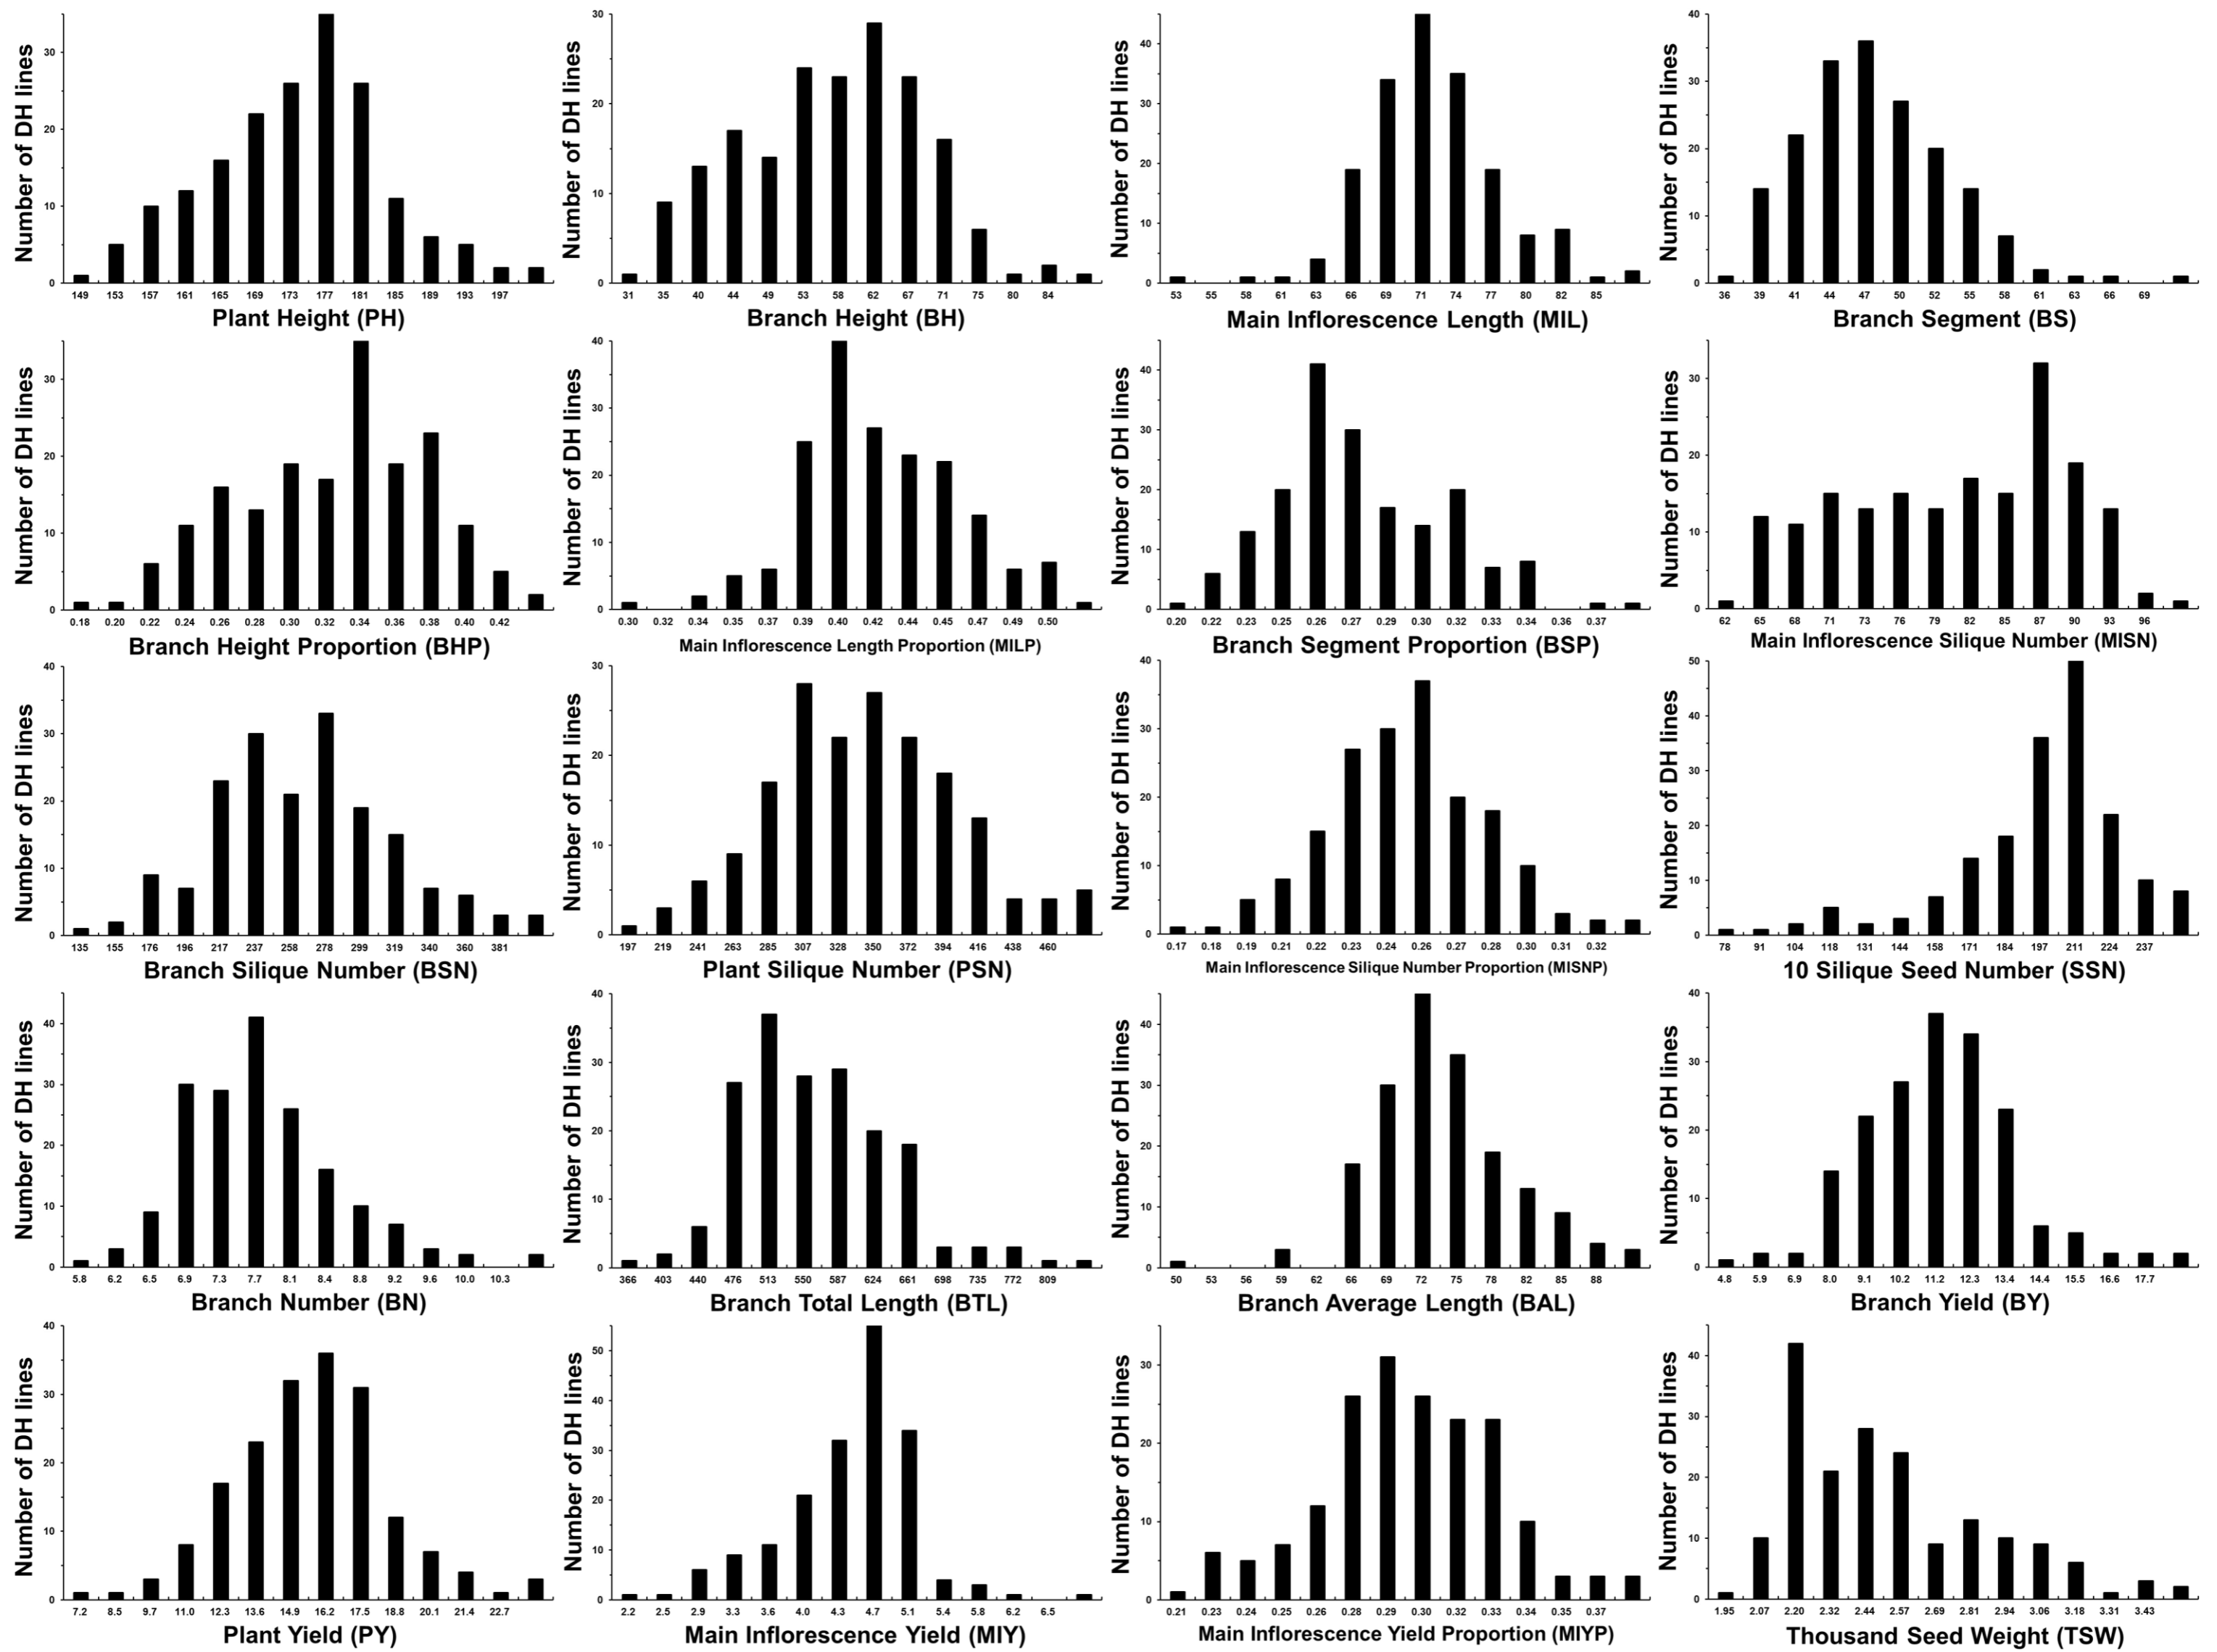

**Supplementary Figure S3.** Distribution of the 20 plant architecture and yield traits in the HJ\_DH population derived from the cross of Hua\_5 and J7005 in the year of 2010-2011 in Huanggang (HG10).

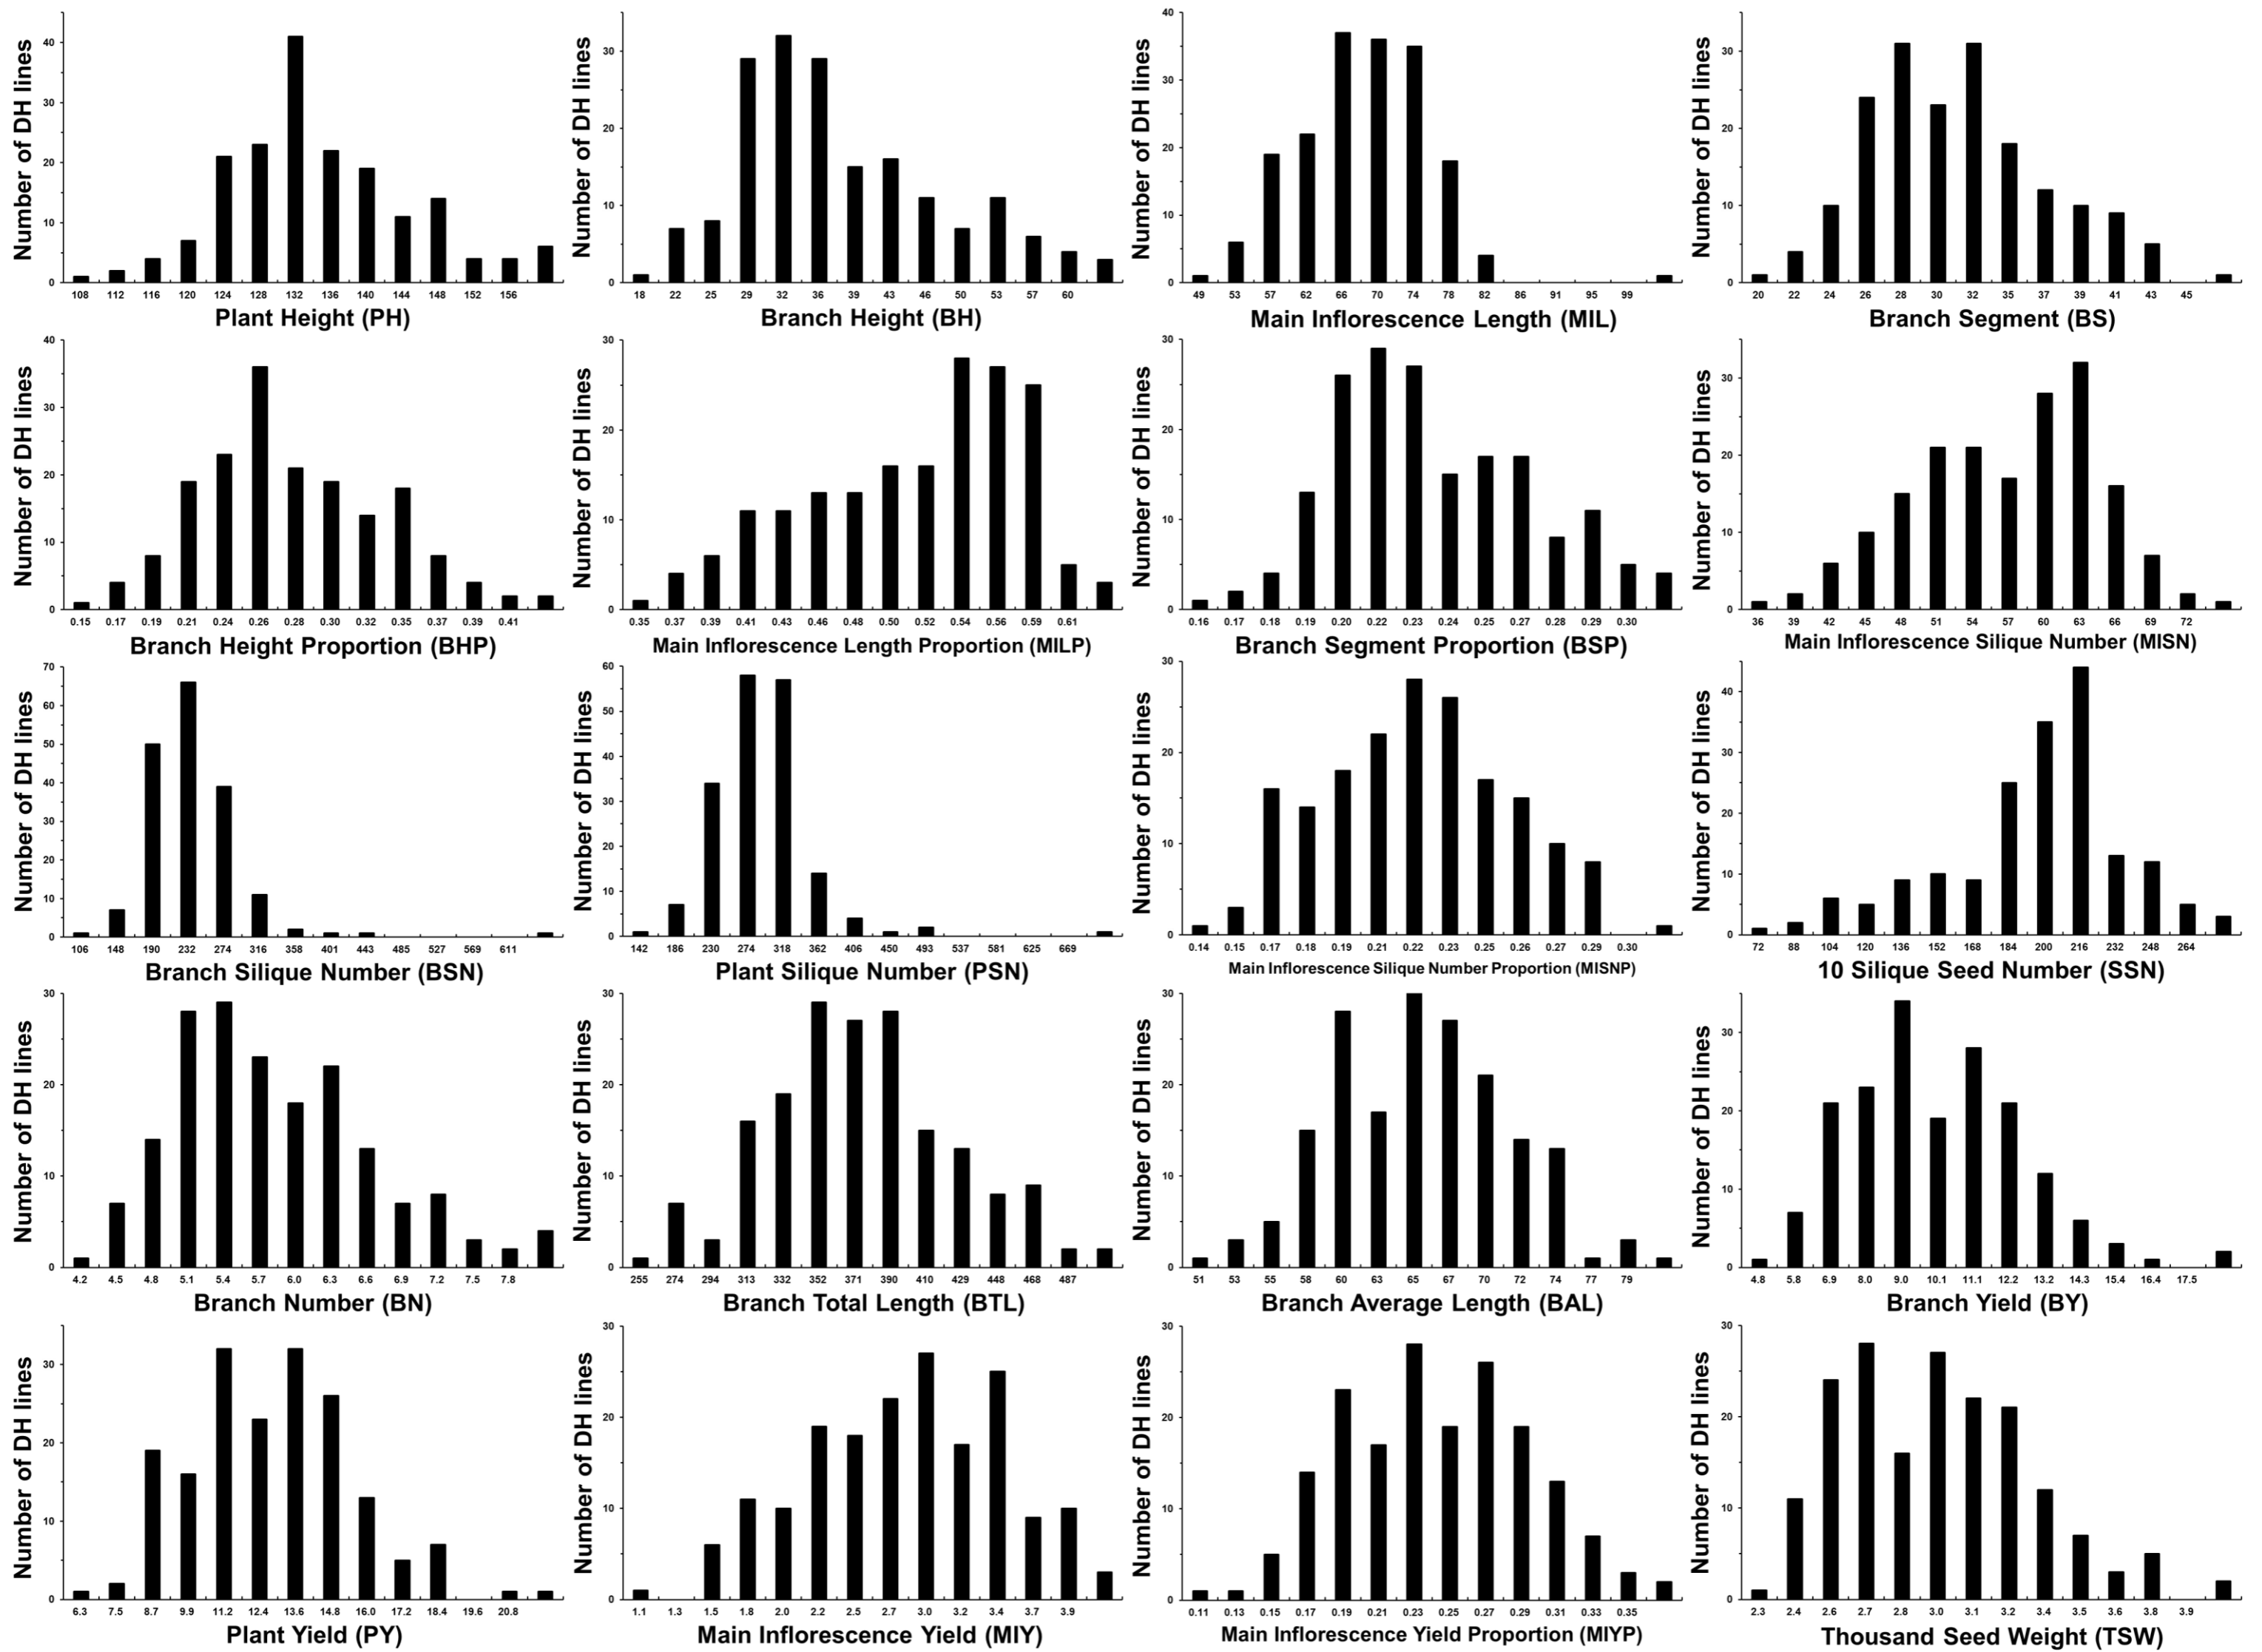

**Supplementary Figure S4.** Distribution of the 20 plant architecture and yield traits in the HJ\_DH population derived from the cross of Hua\_5 and J7005 in the year of 2011 in Gansu (GS11).



610 620 630 640 650 660 670 680 690 700  
Ref (BnaA02g12070D) AATCTTGAGAGCAATAACATGACCGGTACACTTAGAGACTTCCAACAGCCGTGGTTGTTCTCAACCTTGGTTCGAATCGGTTATCCGGTACGCTGCCTT  
N L E S N N M T G T L R D F Q Q P L V V L N L G S N R L S G T L P  
Hua\_5 AATCTTGAGAGCAATAACATGACCGGTACACTTAGAGACTTCCAACAGCCGTGGTTGTTCTCAACCTTGGTTCGAATCGGTTATCCGGTACGCTGCCTT  
N L E S N N M T G T L R D F Q Q P L V V L N L G S N R L S G T L P  
J7005 AATCTTGAGAGCAATAACATGACCGGTACACTTAGAGACTTCCAACAGCCGTGGTTGTTCTCAACCTTGGTTCGAATCGGTTATCCGGTACGCTGCCTT  
N L E S N N M T G T L R D F Q Q P L V V L N L G S N R L S G T L P  
AtCLV2 AATCTTGAGAGCAATAACATGACTGGTACACTCAGAGATTTTCAGCAGCAATGGTGGTCTTAATCTTGCTCAAAATCAGTTTCCGGTACGCTACCTT  
N L E S N N M T G T L R D F Q Q P L V V L N L A S N Q F S G T L P  
Clustal Consensus \*\*\*\*\*

710 720 730 740 750 760 770 780 790 800  
Ref (BnaA02g12070D) GTTCTACGCCCTCTCGTCCATCTCTAAGCGTTCGAATCTAGCTGACAACTCATTAGTTGGTGGACTACCTTCTTGTGGGTCTTTATCAGAGCTGAC  
C F Y A S R P S L S V L N L A D N S L V G G L P S C L G S L S E L T  
Hua\_5 GTTCTACGCCCTCTCGTCCATCTCTAAGCGTTCGAATCTAGCTGACAACTCATTAGTTGGTGGACTACCTTCTTGTGGGTCTTTATCAGAGCTGAC  
C F Y A S R P S L S V L N L A D N S L V G G L P S C L G S L S E L T  
J7005 GTTCTACGCCCTCTCGTCCATCTCTAAGCGTTCGAATCTAGCTGACAACTCATTAGTTGGTGGACTACCTTCTTGTGGGTCTTTATCAGAGCTGAC  
C F Y A S R P S L S V L N L A D N S L V G G L P S C L G S L S E L T  
AtCLV2 GTTCTACGCCCTCTCGTCCGCTCTTAGTATCTCTGAATATAGCTGAGAACTCTCTGGTGGTGGATTACCTTCTTGTGGGTCTTTAAAAGAGCTGAG  
C F Y A S R P S L S I L N I A E N S L V G G L P S C L G S L K E L S  
Clustal Consensus \*\*\*\*\*

810 820 830 840 850 860 870 880 890 900  
Ref (BnaA02g12070D) TCATCTCAATCTCTCCTTCAATGCCTTACGCTACGAGATATCTCCAAGGCTTATCTCTCCGAGAGCTCGTGATGTTGACTTGAAGCCACAACGGGTTT  
H L N L S F N A F S Y E I S P R L I F S E K L V M L D L S H N G F  
Hua\_5 TCATCTCAATCTCTCCTTCAATGCCTTACGCTACGAGATATCTCCAAGGCTTATCTCTCCGAGAGCTCGTGATGTTGACTTGAAGCCACAACGGGTTT  
H L N L S F N A F S Y E I S P R L I F S E K L V M L D L S H N G F  
J7005 TCATCTCAATCTCTCCTTCAATGCCTTACGCTACGAGATATCTCCAAGGCTTATCTCTCCGAGAGCTCGTGATGTTGACTTGAAGCCACAACGGGTTT  
H L N L S F N A F S Y E I S P R L I F S E K L V M L D L S H N G F  
AtCLV2 TCATTTGAATCTATCTTTCAATGCCTTCAACTACGAGATATCTCCTAGGCTTATGTTTTCAGAGAGCTTGTGATGTTGGACTTGAAGCCACAACGGGTTT  
H L N L S F N G F N Y E I S P R L M F S E K L V M L D L S H N G F  
Clustal Consensus \*\*\*\* \* \*\*\*\*\*

910 920 930 940 950 960 970 980 990 1000  
Ref (BnaA02g12070D) TTTGGTCTGCTCCCTAGCAGGATCTCCGAAACAACGACAACTCGGTCTGATTCCTTCTTATTATCTTACAAAGGTTCTCTGGTGGTATACCTTGA  
F G R L P S R I S E T T D K L G L I L L D L S Y N R F S G G I P L  
Hua\_5 TTTGGTCTGCTCCCTAGCAGGATCTCCGAAACAACGACAACTCGGTCTGATTCCTTCTTATTATCTTACAAAGGTTCTCTGGTGGTATACCTTGA  
S G S L P S R I S E T T D K L G L I L L D L S Y N R F S G G I P L  
J7005 TTTGGTCTGCTCCCTAGCAGGATCTCCGAAACAACGACAACTCGGTCTGATTCCTTCTTATTATCTTACAAAGGTTCTCTGGTGGTATACCTTGA  
F G R L P S R I S E T T D K L G L I L L D L S Y N R F S G G I P L  
AtCLV2 TCAGGTCTGCTCCCTAGTGAATCTCCGAAACAACGAGAAATGGGTTGGTCTTCTTACCTCTCACAAATGCTTTCTGGTATATACCTTGA  
S G R L P S R I S E T T E K L G L V L L D L S H N S F S G D I P L  
Clustal Consensus \* \* \* \* \* \*\*\*\*\*

1010 1020 1030 1040 1050 1060 1070 1080 1090 1100  
Ref (BnaA02g12070D) GGATCACCGAGTTAACCGACTTCAAGCATTGCGTCTCTCTCACAATCTTCTAACAGGAGATATCCCTGCGCGAATAGGGAACCTGACTTATCTCCAGT  
R I T E L T S L Q A L R L S H N L L T G D I P A R I G N L T Y L Q V  
Hua\_5 GGATCACCGAGTTAACCGACTTCAAGCATTGCGTCTCTCTCACAATCTTCTAACAGGAGATATCCCTGCGCGAATAGGGAACCTGACTTATCTCCAGT  
R I T E L T S L Q A L R L S H N L L T G D I P A R I G N L T Y L Q V  
J7005 GGATCACCGAGTTAACCGACTTCAAGCATTGCGTCTCTCTCACAATCTTCTAACAGGAGATATCCCTGCGCGAATAGGGAACCTGACTTATCTCCAGT  
R I T E L T S L Q A L R L S H N L L T G D I P A R I G N L T Y L Q V  
AtCLV2 GGATCACAGAGTTGAAGAGTTTCAAGCATTGCGTCTCTCTCACAATCTTTTAACTGGAGATATCCCTGCTAGAATGGTAACTGACATATCTCCAGT  
R I T E L K S L Q A L R L S H N L L T G D I P A R I G N L T Y L Q V  
Clustal Consensus \*\*\*\*\*

1110 1120 1130 1140 1150 1160 1170 1180 1190 1200  
Ref (BnaA02g12070D) CATGATCTTTCCCAACAGCGCTGACCGGACCAATCCCTCTCAACATCGTTGGCTGCTTTCAGTTGCTAGCTCTGATCATCAGCAACAAACCTCTCC  
I D L S H N A L T G P I P L N I V G C F Q L L A L I I S N N N L S  
Hua\_5 CATGATCTTTCCCAACAGCGCTGACCGGACCAATCCCTCTCAACATCGTTGGCTGCTTTCAGTTGCTAGCTCTGATCATCAGCAACAAACCTCTCC  
I D L S H N A L T G P I P L N I V G C F Q L L A L I I S N N N L S  
J7005 CATGATCTTTCCCAACAGCGCTGACCGGACCAATCCCTCTCAACATCGTTGGCTGATCCCTGTTGCTCGCTCTGATCATCAGCAACAAACCTCTCC  
I D L S H N A L T G P I P L N I V G \*  
AtCLV2 CATGATCTTTCCCAACAGCGCTAACCGGCTCAATACCTCTCAACATGTTGGTGGCTTTCAGTTACTGCTCTGATGATAAGTAACAAACATCTCTCT  
I D L S H N A L T G S I P L N I V G C F Q L L A L M I S N N N L S  
Clustal Consensus \*\*\*\*\*



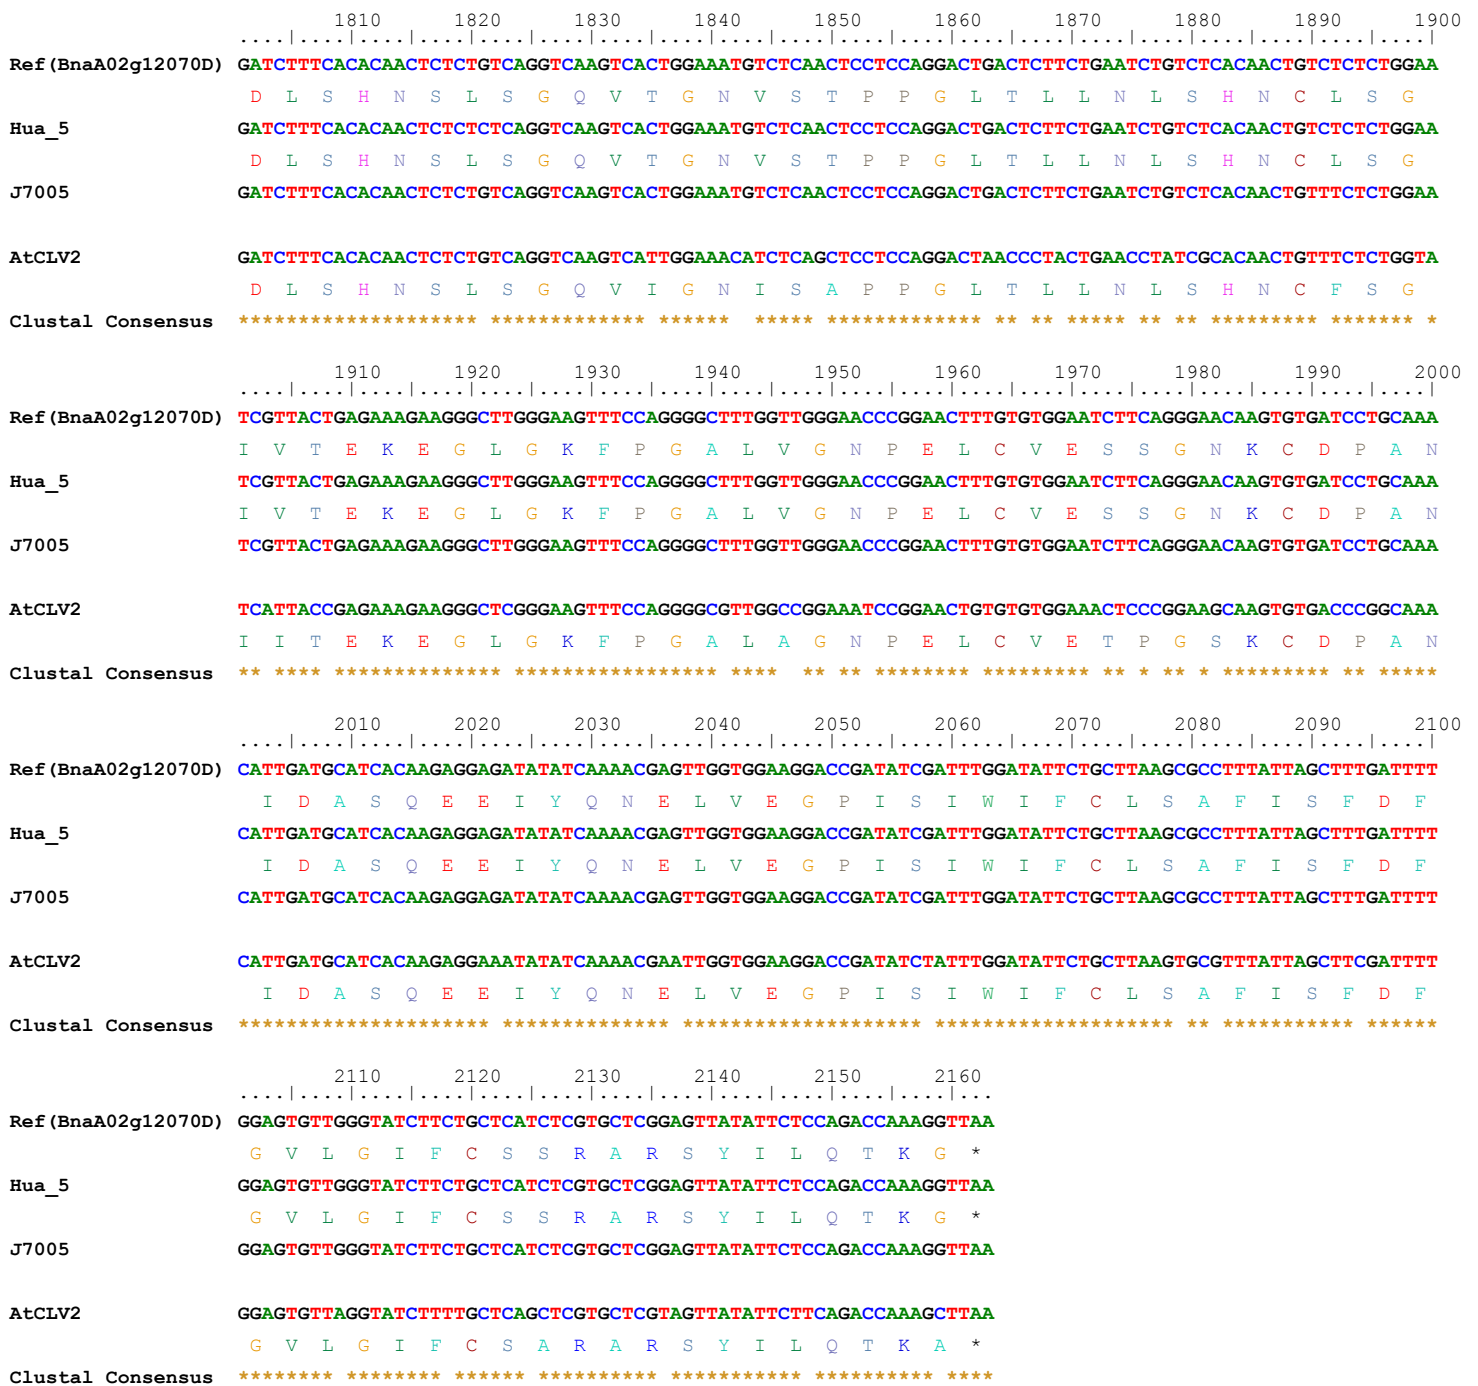

**Supplementary Figure S5.** Alignment of the nucleotide sequences of *CLV2* genes (BnaA02g12070D; no intron) and predicated *CLV2* amino acid sequences from *Brassica napus* reference genome (Darmor-*bzh*), the two parents (Hua\_5 and J7005), and Arabidopsis (AT1G65380.1). The red box refers to the premature termination of amino acid translation caused by point mutation in J7005.



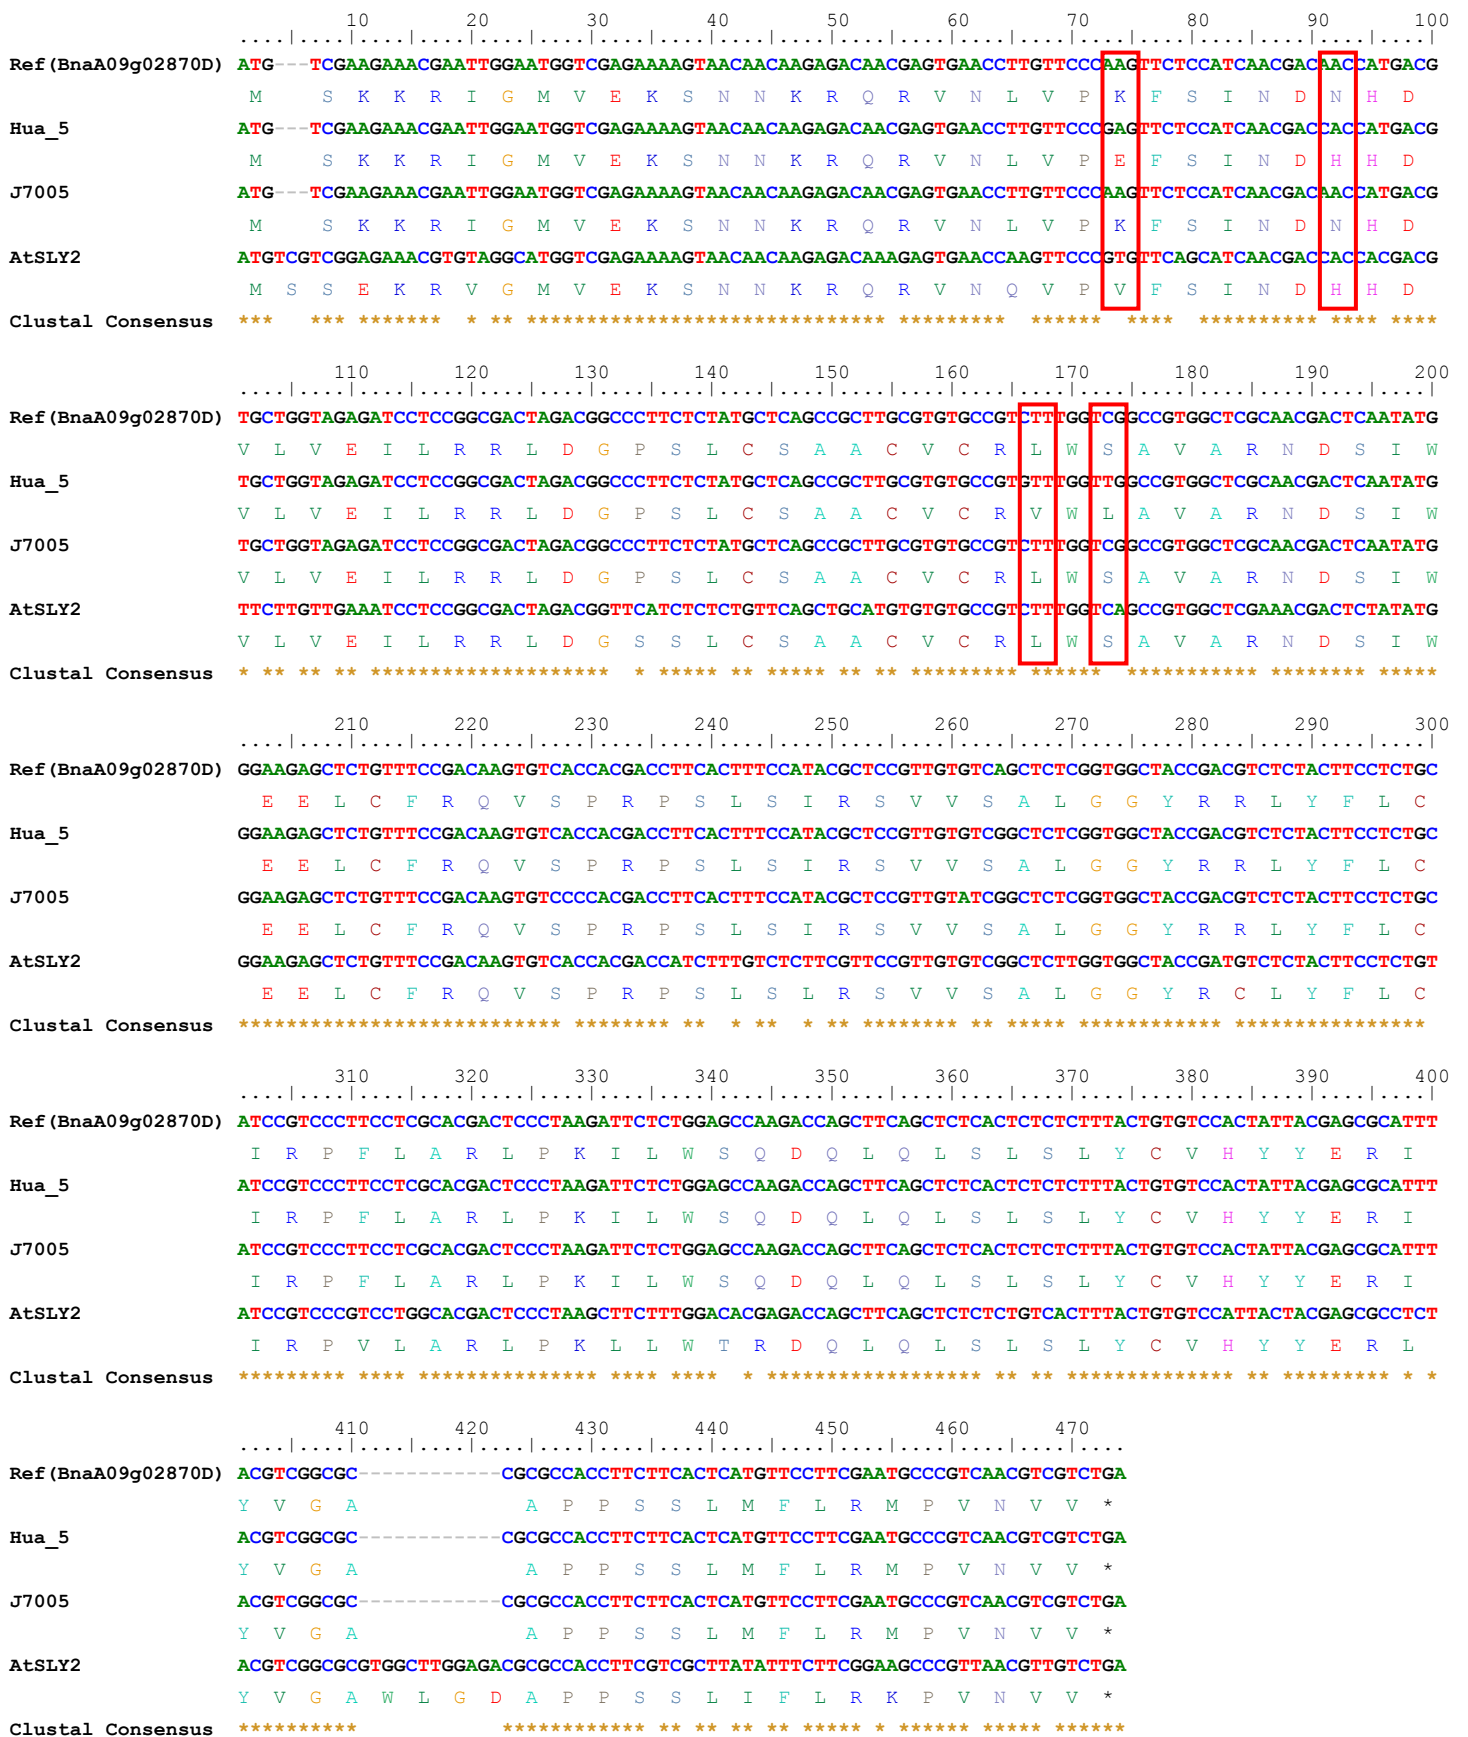

**Supplementary Figure S6.** Alignment of the nucleotide sequences of *SLY2* genes (BnaA09g02870D; no intron) and predicated *SLY2* amino acid sequences from *Brassica napus* reference genome (Darmor-*bzh*), the two parents (Hua\_5 and J7005), and Arabidopsis (AT5G48170.1). The red boxes refer to the different amino acids between Hua\_5 and J7005 caused by point mutation.

10 20 30 40 50 60 70 80 90 100  
Ref\_Genome ATGTTCAATCCTTTCACAACCTCATCACAGGTAACCGAAAAATCAATTATTTTCTGTTAGTAAAAAAAATTGCAGCAACTCTCTGTCTTTCTTCCATG  
Ref\_CDS ATGTTCAATCCTTTCACAACCTCATCACAG-----  
M F N P F T T H H S  
Hua\_5\_Genome ATGTTCAATCCTTTCACAACCTCATCACAGGTAACCGAAAAATCAATTATTTTCTGTTAGTAAAAAAAATTGCAGCAACTCTCTGTCTTTCTTCCATG  
Hua\_5\_CDS ATGTTCAATCCTTTCACAACCTCATCACAG-----  
M F N P F T T H H S  
J7005\_Genome ATGTTCAATCCTTTCACAACCTCATCACAGGTAACCGAAAAATCAATTATTTTCTGTTAGTAAAAAAAATTGCAGCAACTCTCTGTCTTTCTTCCATG  
J7005\_CDS ATGTTCAATCCTTTCACAACCTCATCACAG-----  
M F N P F T T H H S  
AtAHK4 ATGTTCAATCCCTCTCACAACCTATTACAG-----  
M F N P L T T H Y S  
Clustal Consensus \*\*\*\*\* \*\*\*\*\* \*\*\*\*

110 120 130 140 150 160 170 180 190 200  
Ref\_Genome TGCGCCCTCGAAAAATTCGGCTTATTTTTATTTTATTATGCTTCGTTGTTTTGTGCTGTTGTGTTTTCTTTGTTTGGTCAAAGCTTTGTTTTTTTG  
Ref\_CDS -----  
Hua\_5\_Genome TGCGCCCTCGAAAAATTCGGCTTATTTTTATTTTATTATGCTTCGTTGTTTTGTGCTGTTGTGTTTTCTTTGTTTGGTCAAAGCTTTGTTTTTTTG  
Hua\_5\_CDS -----  
J7005\_Genome TGCGCCCTCGAAAAATTCGGCTTATTTTTATTTTATTATGCTTCGTTGTTTTGTGCTGTTGTGTTTTCTTTGTTTGGTCAAAGCTTTGTTTTTTTG  
J7005\_CDS -----  
AtAHK4 -----  
Clustal Consensus -----

210 220 230 240 250 260 270 280 290 300  
Ref\_Genome TTTGTTTGGATTTAAGACAGTGAACATAGCTGTGAACCTTGTCCGAGAAGAAACATCAACTAAACATTTACGCGCTGTAAGAACTTATGATTAGTGTG  
Ref\_CDS -----  
Hua\_5\_Genome TTTGTTTGGATTTAAGACAGTGAACATAGCTGTGAACCTTGTCCGAGAAGAAACATCAACTAAACATTTACGCGCTGTAAGAACTTATGATTAGTGTG  
Hua\_5\_CDS -----  
J7005\_Genome TTTGTTTGGATTTAAGACAGTGAACATAGCTGTGAACCTTGTCCGAGAAGAAACATCAACTAAACATTTACGCGCTGTAAGAACTTATGATTAGTGTG  
J7005\_CDS -----  
AtAHK4 -----  
Clustal Consensus -----

310 320 330 340 350 360 370 380 390 400  
Ref\_Genome TTGCTTAATCATTCCTCTGACAAATTAATTAACCGAAACCCCAATTCCTTAATTTATTTTAAACTAATGCTCACCTCTGTAGCAAACCTTCGGAAACTGA  
Ref\_CDS -----  
Hua\_5\_Genome TTGCTTAATCATTCCTCTGACAAATTAATTAACCGAAACCCCAATTCCTTAATTTATTTTAAACTAATGCTCACCTCTGTAGCAAACCTTCGGAAACTGA  
Hua\_5\_CDS -----  
J7005\_Genome TTGCTTAATCATTCCTCTGACAAATTAATTAACCGAAACCCCAATTCCTTAATTTATTTTAAACTAATGCTCACCTCTGTAGCAAACCTTCGGAAACTGA  
J7005\_CDS -----  
AtAHK4 -----  
Clustal Consensus -----

410 420 430 440 450 460 470 480 490 500  
Ref\_Genome GCAAAGTTCCCTCTTTTGTAGAGTAGTCCCATGCGTTGAGAAAAAGTTTCTTGAATTTGCCAAAAAAAACCCTCTCTTTTGGTTATGCTTTGTTAATG  
Ref\_CDS -----  
Hua\_5\_Genome GCAAAGTTCCCTCTTTTGTAGAGTAGTCCCATGCGTTGAGAAAAAGTTTCTTGAATTTGCCAAAAAAAACCCTCTCTTTTGGTTATGCTTTGTTAATG  
Hua\_5\_CDS -----  
J7005\_Genome GCAAAGTTCCCTCTTTTGTAGAGTAGTCCCATGCGTTGAGAAAAAGTTTCTTGAATTTGCCAAAAAAAACCCTCTCTTTTGGTTATGCTTTGTTAATG  
J7005\_CDS -----







Clustal Consensus \*\*\*\*\* \* \*\*\*\*\* \*\* \* \* \* \* \* \*\*\*\*\* \*\*\*\*\* \*\*\*\*\* \* \* \* \* \* \*\*\*\*\* \* \*\*\*\*\* \*  
1910 1920 1930 1940 1950 1960 1970 1980 1990 2000  
Ref\_Genome TTGAGAACTACTCGGTCAGCTCGCTGGCAACCAGGCGATAGTAGTGCACGTGTATGACATCACCACGCGTCGGATCCGCTCGTCATGTACGGGAATCA  
Ref\_CDS TTGAGAACTACTCGGTCAGCTCGCTGGCAACCAGGCGATAGTAGTGCACGTGTATGACATCACCACGCGTCGGATCCGCTCGTCATGTACGGGAATCA  
V E N L L G Q L A G N Q A I V V H V Y D I T N A S D P L V M Y G N Q  
Hua\_5\_Genome TTGAGAACTACTCGGTCAGCTCGCTGGCAACCAGGCGATAGTAGTGCACGTGTATGACATCACCACGCGTCGGATCCGCTCGTCATGTACGGGAATCA  
Hua\_5\_CDS TTGAGAACTACTCGGTCAGCTCGCTGGCAACCAGGCGATAGTAGTGCACGTGTATGACATCACCACGCGTCGGATCCGCTCGTCATGTACGGGAATCA  
V E N L L G Q L A G N Q A I V V H V Y D I T N A S D P L V M Y G N Q  
J7005\_Genome TTGAGAACTACTCGGTCAGCTCGCTGGCAACCAGGCGATAGTAGTGCACGTGTATGACATCACCACGCGTCGGATCCGCTCGTCATGTACGGGAATCA  
J7005\_CDS TTGAGAACTACTCGGTCAGCTCGCTGGCAACCAGGCGATAGTAGTGCACGTGTATGACATCACCACGCGTCGGATCCGCTCGTCATGTACGGGAATCA  
V E N L L G Q L A G N Q A I V V H V Y D I T N A S D P L V M Y G N Q  
AtAHK4 TCAGAAATTTACTTGGTCAGCTTCTGTTGTAACCAAGCAATAGTTGTGATGTGTATGATATCACCACATGCATCAGATCCACTTGTTCATGTATGGTAATCA  
V E N L L G Q L A G N Q A I V V H V Y D I T N A S D P L V M Y G N Q  
Clustal Consensus \* \*\*\*\*\* \* \* \*\*\*\*\* \* \* \* \* \* \*\*\*\*\* \*\*\*\*\* \*\*\*\*\* \* \* \* \* \* \*\*\*\*\* \* \*\*\*\*\* \*  
2010 2020 2030 2040 2050 2060 2070 2080 2090 2100  
Ref\_Genome AGACGAAGAAGCGACACGCTCTCTACCACGAGAGCAAGCTTGATTTCCGAGACCCCTTTCAGGAAGCATAAGATGATCTGTAGGTATCTCCAGAAGCGG  
Ref\_CDS AGACGAAGAAGCGACACGCTCTCTACCACGAGAGCAAGCTTGATTTCCGAGACCCCTTTCAGGAAGCATAAGATGATCTGTAGGTATCTCCAGAAGCGG  
D E E G D T S L Y H E S K L D F G D P F R K H K M I C R Y L Q K A  
Hua\_5\_Genome AGACGAAGAAGCGACACGCTCTCTACCACGAGAGCAAGCTTGATTTCCGAGACCCCTTTCAGGAAGCACAAGATGATCTGTAGGTATCTCCAGAAGCGG  
Hua\_5\_CDS AGACGAAGAAGCGACACGCTCTCTACCACGAGAGCAAGCTTGATTTCCGAGACCCCTTTCAGGAAGCACAAGATGATCTGTAGGTATCTCCAGAAGCGG  
D E E G D T S L Y H E S K L D F G D P F R K H K M I C R \*  
J7005\_Genome AGACGAAGAAGCGACACGCTCTCTACCACGAGAGCAAGCTTGATTTCCGAGACCCCTTTCAGGAAGCATAAGATGATCTGTAGGTATCTCCAGAAGCGG  
J7005\_CDS AGACGAAGAAGCGACACGCTCTCTACCACGAGAGCAAGCTTGATTTCCGAGACCCCTTTCAGGAAGCATAAGATGATCTGTAGGTATCTCCAGAAGCGG  
D E E G D T S L Y H E S K L D F G D P F R K H K M I C R Y L Q K A  
AtAHK4 AGATGAAGAAGCCGACAGATCTCTCTCATGAGAGCAAGCTCGATTTTGGAGACCCCTTTCAGGAAGCATAAGATGATATGACAGGTACACCCAAAAGGCA  
D E E A D R S L S H E S K L D F G D P F R K H K M I C R Y H Q K A  
Clustal Consensus \*\*\* \*\*\*\*\* \* \* \* \* \* \*\*\*\*\* \* \* \* \* \* \*\*\*\*\* \*\*\*\*\* \*\*\*\*\* \* \* \* \* \* \*\*\*\*\* \* \*\*\*\*\* \*  
2110 2120 2130 2140 2150 2160 2170 2180 2190 2200  
Ref\_Genome CCTATACCGTTGAACGTACTCACGACCGTTGCGTTGTTCTTTGCTATTGGTTTCTTGGTTGGTTACATACTCTACGGTGCAGCTGTGCATATTGTTAAAG  
Ref\_CDS CCTATACCGTTGAACGTACTCACGACCGTTGCGTTGTTCTTTGCTATTGGTTTCTTGGTTGGTTACATACTCTACGGTGCAGCTGTGCATATTGTTAAAG  
P I P L N V L T T V A L F F A I G F L V G Y I L Y G A A V H I V K  
Hua\_5\_Genome CCTATACCGTTGAATGTACTCACGACCGTCCGTTGTTCTTTGCTATTGGTTTCTTGGTTGGTTACATACTCTATGGTGCAGCTGTGCATATTGTTAAAG  
Hua\_5\_CDS CCTATACCGTTGAATGTACTCACGACCGTCCGTTGTTCTTTGCTATTGGTTTCTTGGTTGGTTACATACTCTATGGTGCAGCTGTGCATATTGTTAAAG  
J7005\_Genome CCTATACCGTTGAACGTACTCACGACCGTTGCGTTGTTCTTTGCTATTGGTTTCTTGGTTGGTTACATACTCTACGGTGCAGCTGTGCATATTGTTAAAG  
J7005\_CDS CCTATACCGTTGAACGTACTCACGACCGTTGCGTTGTTCTTTGCTATTGGTTTCTTGGTTGGTTACATACTCTACGGTGCAGCTGTGCATATTGTTAAAG  
P I P L N V L T T V A L F F A I G F L V G Y I L Y G A A V H I V K  
AtAHK4 CCAATACCGTTGAATGTGCTCACAACTGTCCATTGTTCTTTGCTATTGGTTTCTTGGTTGGTTATATACTGTATGGTGCAGCTATGCACATAGTAAAG  
P I P L N V L T T V P L F F A I G F L V G Y I L Y G A A M H I V K  
Clustal Consensus \*\* \*\*\*\*\* \* \* \* \* \* \*\*\*\*\* \* \* \* \* \* \*\*\*\*\* \*\*\*\*\* \*\*\*\*\* \* \* \* \* \* \*\*\*\*\* \* \*\*\*\*\* \*  
2210 2220 2230 2240 2250 2260 2270 2280 2290 2300  
Ref\_Genome TTGAAGATGATTTCCATGAGATGCAAGAGCTCAAGTCCGAGCAGAAGCTGTGACGTGGCTAAATCGCAGTTTCTTGGCACCCTCTCTCACCAGATCAG  
Ref\_CDS TTGAAGATGATTTCCATGAGATGCAAGAGCTCAAGTCCGAGCAGAAGCTGTGACGTGGCTAAATCGCAGTTTCTTGGCACCCTCTCTCACCAGATCAG  
V E D D F H E M Q E L K V R A E A A D V A K S Q F L A T V S H E I R  
Hua\_5\_Genome TTGAAGATGATTTTCCATGAGATGCAAGAGCTCAAGTCCGAGCAGAAGCTGTGACGTGGCTAAATCGCAGTTTTTGGCTACTGCTCTCACCAGATCAG  
Hua\_5\_CDS TTGAAGATGATTTTCCATGAGATGCAAGAGCTCAAGTCCGAGCAGAAGCTGTGACGTGGCTAAATCGCAGTTTTTGGCTACTGCTCTCACCAGATCAG  
J7005\_Genome TTGAAGATGATTTCCATGAGATGCAAGAGCTCAAGTCCGAGCAGAAGCTGTGACGTGGCTAAATCGCAGTTTCTTGGCACCCTCTCTCACCAGATCAG  
J7005\_CDS TTGAAGATGATTTCCATGAGATGCAAGAGCTCAAGTCCGAGCAGAAGCTGTGACGTGGCTAAATCGCAGTTTCTTGGCACCCTCTCTCACCAGATCAG  
V E D D F H E M Q E L K V R A E A A D V A K S Q F L A T V S H E I R  
AtAHK4 TCGAAGATGATTTCCATGAAATGCAAGAGCTTAAAGTCCGAGCAGAAGCTGTGATGTCGCTAAATCGCAGTTTCTTGGCTACCGTGTCTCACCAGATCAG  
V E D D F H E M Q E L K V R A E A A D V A K S Q F L A T V S H E I R  
Clustal Consensus \* \*\*\*\*\* \* \* \* \* \* \*\*\*\*\* \* \* \* \* \* \*\*\*\*\* \*\*\*\*\* \*\*\*\*\* \* \* \* \* \* \*\*\*\*\* \* \*\*\*\*\* \*  
2310 2320 2330 2340 2350 2360 2370 2380 2390 2400  
Ref\_Genome GACGCCGATGAATGGGATTCTCGGAATGCTTGCTATGCTTCTTGATACGGAGCTTAGCTCTACGCAGAGAGATTACGCTCAGACCCGCGAGGTTTGTGGG  
Ref\_CDS GACGCCGATGAATGGGATTCTCGGAATGCTTGCTATGCTTCTTGATACGGAGCTTAGCTCTACGCAGAGAGATTACGCTCAGACCCGCGAGGTTTGTGGG  
T P M N G I L G M L A M L L D T E L S S T Q R D Y A Q T A Q V C G  
Hua\_5\_Genome GACGCCGATGAATGGGATTCTCGGAATGCTTGCTATGCTTCTTGATACGGAGCTTAGCTCTACGCAGAGAGATTACGCTCAGACCCGCGAGGTTTGTGGG  
Hua\_5\_CDS GACGCCGATGAATGGGATTCTCGGAATGCTTGCTATGCTTCTTGATACGGAGCTTAGCTCTACGCAGAGAGATTACGCTCAGACCCGCGAGGTTTGTGGG  
J7005\_Genome GACGCCGATGAATGGGATTCTCGGAATGCTTGCTATGCTTCTTGATACGGAGCTTAGCTCTACGCAGAGAGATTACGCTCAGACCCGCGAGGTTTGTGGG  
J7005\_CDS GACGCCGATGAATGGGATTCTCGGAATGCTTGCTATGCTTCTTGATACGGAGCTTAGCTCTACGCAGAGAGATTACGCTCAGACCCGCGAGGTTTGTGGG



Hua\_5\_Genome CGTTTAGTTTGGTTCAATACAAATCTTGAAGAATTAAACCCGAAATAAGTTCAGTTCGGTATTCGGTTGGTTGGGTTTTTGAAGATCCTACCGATGTTTTT  
Hua\_5\_CDS -----

J7005\_Genome CGTTTAGTTTGGTTCAATACAAATCTTGAAGAATTAAACCCGAAATAAGTTCAGTTCGGTATTCGGTTGGTTGGGTTTTTGAAGATCCTACCGATGTTTTT  
J7005\_CDS -----

AtAHK4 -----

Clustal Consensus

.....2910.....2920.....2930.....2940.....2950.....2960.....2970.....2980.....2990.....3000  
Ref\_Genome GGCTTTGGTTATATTTTGGTTTAAATTTGTTAAAATTTAAAATAAGTTCTGTAACTTCAGTTAGTTCGGTTTGAATTTTGTAGTTCAGTACAGATTT  
Ref\_CDS -----

Hua\_5\_Genome GGCTTTGGTTATATTTTGGTTTAAATTTGTTAAAATTTAAAATAAGTTCTGTAACTTCAGTTAGTTCGGTTTGAATTTTGTAGTTCAGTACAGATTT  
Hua\_5\_CDS -----

J7005\_Genome GGCTTTGGTTATATTTTGGTTTAAATTTGTTAAAATTTAAAATAAGTTCTGTAACTTCAGTTAGTTCGGTTTGAATTTTGTAGTTCAGTACAGATTT  
J7005\_CDS -----

AtAHK4 -----

Clustal Consensus

.....3010.....3020.....3030.....3040.....3050.....3060.....3070.....3080.....3090.....3100  
Ref\_Genome TTGGTATGGTTTGGCTGTTATTTTTCATTCCTTTAAAGAAAATAAAGTAACCGACTGCCGAAACCAAAACCAAACTTTTAAATAACCTACCAAATCG  
Ref\_CDS -----

Hua\_5\_Genome TTGGTATGGTTTGGCTGTTATTTTTCATTCCTTTAAAGAAAATAAAGTAACCGACTGCCGAAACCAAAACCAAACTTTTAAATAACCTACCAAATCG  
Hua\_5\_CDS -----

J7005\_Genome TTGGTATGGTTTGGCTGTTATTTTTCATTCCTTTAAAGAAAATAAAGTAACCGACTGCCGAAACCAAAACCAAACTTTTAAATAACCTACCAAATCG  
J7005\_CDS -----

AtAHK4 -----

Clustal Consensus

.....3110.....3120.....3130.....3140.....3150.....3160.....3170.....3180.....3190.....3200  
Ref\_Genome AACCGAACTCCTAACCAAAATTTTGGTTTCAGTCTAATTTAAAATCCCACTTATTCTTGTCCTCCCTGTGGAAGTAGATTGTTGTTTGAATCAAGATGTTG  
Ref\_CDS -----

Hua\_5\_Genome AACCGAACTCCTAACCAAAATTTTGGTTTCAGTCTAATTTAAAATCCCACTTATTCTTGTCCTCCCTGTGGAAGTAGATTGTTGTTTGAATCAAGATGTTG  
Hua\_5\_CDS -----

J7005\_Genome AACCGAACTCCTAACCAAAATTTTGGTTTCAGTCTAATTTAAAATCCCACTTATTCTTGTCCTCCCTGTGGAAGTAGATTGTTGTTTGAATCAAGATGTTG  
J7005\_CDS -----

AtAHK4 -----

Clustal Consensus

.....3210.....3220.....3230.....3240.....3250.....3260.....3270.....3280.....3290.....3300  
Ref\_Genome TCTTTTTTCTTTTGACACAGTTCACAGAGAAAGGACATATCTTTGTCAAAGTCCAATCTCGCGGAACAATCAAAGACGGAGCTGAATCCAAACCCGCATT  
Ref\_CDS -----  
TTCACAGAGAAAGGACATATCTTTGTCAAAGTCCAATCTCGCGGAACAATCAAAGACGGAGCTGAATCCAAACCCGCATT

Hua\_5\_Genome TCTTTTTTCTTTTGACACAGTTCACAGAGAAAGGACATATCTTTGTCAAAGTCCAATCTCGCGGAACAATCAAAGACGGAGCTGAATCCAAACCCGCATT  
Hua\_5\_CDS -----  
TTCACAGAGAAAGGACATATCTTTGTCAAAGTCCAATCTCGCGGAACAATCAAAGACGGAGCTGAATCCAAACCCGCATT  
F T E K G H I F V K V H L A E Q S K D G A E S K P A L

J7005\_Genome TCTTTTTTCTTTTGACACAGTTCACAGAGAAAGGACATATCTTTGTCAAAGTCCAATCTCGCGGAACAATCAAAGACGGAGCTGAATCCAAACCCGCATT  
J7005\_CDS -----  
TTCACAGAGAAAGGACATATCTTTGTCAAAGTCCAATCTCGCGGAACAATCAAAGACGGAGCTGAATCCAAACCCGCATT  
F T E K G H I F V K V H L A E Q S K D G A E S K P A L

AtAHK4 -----  
TTCACAGAGAAAGGACATATCTTTGTTAAAGTCCAATCTCGCGGAACAATCAAAGATGAATCTGAACCGAAAAATGCATT  
F T E K G H I F V K V H L A E Q S K D E S E P K N A L

Clustal Consensus \*\*\*\*\*



3310 3320 3330 3340 3350 3360 3370 3380 3390 3400  
Ref\_Genome GAACGGAGGAGTAGCCTCTGAAGACATAACCGCCGCTTCCAACCGTCGAGTTACAACACACTGAGCGGCTACGAAGCTGCTGACGGTCGAAACAGCTGG  
Ref\_CDS GAACGGAGGAGTAGCCTCTGAAGACATAACCGCCGCTTCCAACCGTCGAGTTACAACACACTGAGCGGCTACGAAGCTGCTGACGGTCGAAACAGCTGG  
N G G V A S E D I T A A S K P S S Y N T L S G Y E A A D G R N S W  
Hua\_5\_Genome GAACGGAGGAGTAGCCTCTGAAGACATAACCGCCGCTTCCAACCGTCGAGTTACAACACACTGAGCGGCTACGAAGCTGCTGACGGTCGAAACAGCTGG  
Hua\_5\_CDS GAACGGAGGAGTAGCCTCTGAAGACATAACCGCCGCTTCCAACCGTCGAGTTACAACACACTGAGCGGCTACGAAGCTGCTGACGGTCGAAACAGCTGG

J7005\_Genome GAACGGAGGAGTAGCCTCTGAAGACATAACCGCCGCTTCCAACCGTCGAGTTACAACACACTGAGCGGCTACGAAGCTGCTGACGGTCGAAACAGCTGG  
J7005\_CDS GAACGGAGGAGTAGCCTCTGAAGACATAACCGCCGCTTCCAACCGTCGAGTTACAACACACTGAGCGGCTACGAAGCTGCTGACGGTCGAAACAGCTGG  
N G G V A S E D I T A A S K P S S Y N T L S G Y E A A D G R N S W  
AtAHK4 GAATGGTGGAGT---GTCTGAAGAAATGATCGTTGTTCCAACAGTCAAGTTACAACACATTGAGCGGTTACGAAGCTGCTGATGGTCGGAATAGCTGG  
N G G V S E E M I V V S K Q S S Y N T L S G Y E A A D G R N S W  
Clustal Consensus \*\*\* \*\* \*\*\*\*\* \* \* \* \* \* \*\*\*\*\* \* \* \* \*\*\*\*\* \* \* \* \* \* \*\*\*\*\* \* \* \* \* \* \*\*\*\*\* \* \* \* \* \*

3410 3420 3430 3440 3450 3460 3470 3480 3490 3500  
Ref\_Genome GACTCATTCAAACACTTGGTCTCGTCGGAGGAGCTGTTGACATCATCAGAGTTCGACGCTCCAGTAACTCAGGCTTATGGTTTCTATCGAAGACACAG  
Ref\_CDS GACTCATTCAAACACTTGGTCTCGTCGGAGGAGCTGTTGACATCATCAGAGTTCGACGCTCCAGTAACTCAGGCTTATGGTTTCTATCGAAGACACAG  
D S F K H L V S S E E L L T S S E F D A S S N V R L M V S I E D T  
Hua\_5\_Genome GACTCATTCAAACACTTGGTCTCGTCGGAGGAGCTGTTGACATCATCAGAGTTCGACGCTCCAGTAACTCAGGCTTATGGTTTCTATCGAAGACACAG  
Hua\_5\_CDS GACTCATTCAAACACTTGGTCTCGTCGGAGGAGCTGTTGACATCATCAGAGTTCGACGCTCCAGTAACTCAGGCTTATGGTTTCTATCGAAGACACAG

J7005\_Genome GACTCATTCAAACACTTGGTCTCGTCGGAGGAGCTGTTGACATCATCAGAGTTCGACGCTCCAGTAACTCAGGCTTATGGTTTCTATCGAAGACACAG  
J7005\_CDS GACTCATTCAAACACTTGGTCTCGTCGGAGGAGCTGTTGACATCATCAGAGTTCGACGCTCCAGTAACTCAGGCTTATGGTTTCTATCGAAGACACAG  
D S F K H L V S S E E L L T S S E F D A S S N V R L M V S I E D T  
AtAHK4 GATTCATTCAGCATTTGGTCTCTGAGGAGCA-----GTCATTATCGGAGTTTGATATTCTAGCAATGTTAGGCTTATGGTTTCAATCGAAGACACGG  
D S F K H L V S E E Q S L S E F D I S S N V R L M V S I E D T  
Clustal Consensus \*\* \*\*\*\*\* \* \* \* \* \* \*\*\*\*\* \* \* \* \* \* \*\*\*\*\* \* \* \* \* \* \*\*\*\*\* \* \* \* \* \* \*\*\*\*\* \* \* \* \* \*

3510 3520 3530 3540 3550 3560 3570 3580 3590 3600  
Ref\_Genome GTATTGGGATCCCTTTAGCCGCGCAAGGACGTGCTTCATGCCGTTTATGCAAGCGGATAGCTCCACTTCGAGAACCTACGGAGGTACTGGGATTGGTTT  
Ref\_CDS GTATTGGGATCCCTTTAGCCGCGCAAGGACGTGCTTCATGCCGTTTATGCAAGCGGATAGCTCCACTTCGAGAACCTACGGAGGTACTGGGATTGGTTT  
G I G I P L A A Q G R V F M P F M Q A D S S T S R T Y G G T G I G L  
Hua\_5\_Genome GCATTGGAATCCCTTTAACC GCGCAAGGACGTGCTTCATGCCGTTTATGCAAGCGGATAGCTCCACTTCGAGAACCTACGGAGGTACTGGGATTGGTTT  
Hua\_5\_CDS GCATTGGAATCCCTTTAACC GCGCAAGGACGTGCTTCATGCCGTTTATGCAAGCGGATAGCTCCACTTCGAGAACCTACGGAGGTACTGGGATTGGTTT

J7005\_Genome GTATTGGGATCCCTTTAGCCGCGCAAGGACGTGCTTCATGCCGTTTATGCAAGCGGATAGCTCCACTTCGAGAACCTACGGAGGTACTGGGATTGGTTT  
J7005\_CDS GTATTGGGATCCCTTTAGCCGCGCAAGGACGTGCTTCATGCCGTTTATGCAAGCGGATAGCTCCACTTCGAGAACCTACGGAGGTACTGGGATTGGTTT  
G I G I P L A A Q G R V F M P F M Q A D S S T S R T Y G G T G I G L  
AtAHK4 GTATTGGAATCCCTTTAGTTGCGCAAGGCCGTGTTTATGCCGTTTATGCAAGCAGATAGCTCGACTTCAAGAACTATGGAGGTACTGGTATTGGTTT  
G I G I P L V A Q G R V F M P F M Q A D S S T S R N Y G G T G I G L  
Clustal Consensus \* \*\*\*\*\* \*\*\*\*\* \*\*\*\*\* \* \*\*\*\*\* \*\*\*\*\* \*\*\*\*\* \*\*\*\*\* \*\*\*\*\* \*\*\*\*\* \*\*\*\*\* \*\*\*\*\* \*\*\*\*\* \*\*\*\*\*

3610 3620 3630 3640 3650 3660 3670 3680 3690 3700  
Ref\_Genome GAGTATAAGCAAGTGTCTCGTCGAGCTTATGCGCGGTGAGATAAGTTTCGTGAGCAGGCCCTCGCGTTGGTAGCAGCTTCTGGTTACCCGCTGTGTTT  
Ref\_CDS GAGTATAAGCAAGTGTCTCGTCGAGCTTATGCGCGGTGAGATAAGTTTCGTGAGCAGGCCCTCGCGTTGGTAGCAGCTTCTGGTTACCCGCTGTGTTT  
S I S K C L V E L M R G Q I S F V S R P R V G S T F W F T A V F E  
Hua\_5\_Genome GAGTATAAGCAAGTGTCTCGTCGAGCTTATGCGCGGTGAGATAAGTTTCGTGAGCAGGCCCTCGCGTTGGAAGCAGCTTCTGGTTACCCGCTGTGTTT  
Hua\_5\_CDS GAGTATAAGCAAGTGTCTCGTCGAGCTTATGCGCGGTGAGATAAGTTTCGTGAGCAGGCCCTCGCGTTGGAAGCAGCTTCTGGTTACCCGCTGTGTTT

J7005\_Genome GAGTATAAGCAAGTGTCTCGTCGAGCTTATGCGCGGTGAGATAAGTTTCGTGAGCAGGCCCTCGCGTTGGTAGCAGCTTCTGGTTACCCGCTGTGTTT  
J7005\_CDS GAGTATAAGCAAGTGTCTCGTCGAGCTTATGCGCGGTGAGATAAGTTTCGTGAGCAGGCCCTCGCGTTGGTAGCAGCTTCTGGTTACCCGCTGTGTTT  
S I S K C L V E L M R G Q I S F V S R P R V G S T F W F T A V F E  
AtAHK4 GAGTATAAGCAAGTGTCTTGTGAACCTTATGCGTGGTCAGATAAATTTTCATAGCCGCCCTCATATTGGAAGCAGCTTCTGGTTACCCGCTGTGTTT  
S I S K C L V E L M R G Q I N F I S R P H I G S T F W F T A V L E  
Clustal Consensus \*\*\*\*\* \*\*\*\*\* \* \* \* \*\*\*\*\* \*\*\*\*\* \*\*\*\*\* \*\*\*\*\* \*\*\*\*\* \*\*\*\*\* \*\*\*\*\* \*\*\*\*\* \*\*\*\*\* \*\*\*\*\*

3710 3720 3730 3740 3750 3760 3770 3780 3790 3800  
Ref\_Genome AGGTGTGATAAATGCAGTC-----TGAAGAAGCCTACGGTTGAGAATCTGCCTTCTAGTTTATAGGGATGAGAGCTATTGTTGTTGATGCTA  
Ref\_CDS AGGTGTGATAAATGCAGTC-----TGAAGAAGCCTACGGTTGAGAATCTGCCTTCTAGTTTATAGGGATGAGAGCTATTGTTGTTGATGCTA  
R C D K C S L K K P T V E N L P S S F R G M R A I V V D A  
Hua\_5\_Genome AGGTGTGATAAATGCAGTC-----TGAAGAAGCCTACGGTTGAGAATCTGCCTTCTAGTTTATAGGGATGAGAGCTATTGTTGTTGATGCTA  
Hua\_5\_CDS AGGTGTGATAAATGCAGTC-----TGAAGAAGCCTACGGTTGAGAATCTGCCTTCTAGTTTATAGGGATGAGAGCTATTGTTGTTGATGCTA

J7005\_Genome AGGTGTGATAAATGCAGTC-----TGAAGAAGCCTACGGTTGAGAATCTGCCTTCTAGTTTATAGGGATGAGAGCTATTGTTGTTGATGCTA  
J7005\_CDS AGGTGTGATAAATGCAGTC-----TGAAGAAGCCTACGGTTGAGAATCTGCCTTCTAGTTTATAGGGATGAGAGCTATTGTTGTTGATGCTA  
R C D K C S L K K P T V E N L P S S F R G M R A I V V D A



J7005\_Genome GGTGATAATGAAGCCGTTGAGAGCAAGCATGATCGGCGCGTGTTCACAGCAAGTTCGAGCTGAGAAAGGCAGACAGCAGCATCCTGAGGGATCATCA

J7005\_CDS GGTGATAATGAAGCCGTTGAGAGCAAGCATGATCGGCGCGTGTTCACAGCAAGTTCGAGCTGAGAAAGGCAGACAGCAGCATCCTGAGGGATCATCA  
V I M K P L R A S M I G A C L Q Q V L E L R K A R Q Q H P E G S S

AtAHK4 GGTAAATAATGAAGCCGTTAAGAGCAAGCATGATGGGGCGTGTCTGCAACAAGTTCGAGCTGAGAAAAACAGACAACACATCCAGAAGGATCATCA  
V I M K P L R A S M I G A C L Q Q V L E L R K T R Q Q H P E G S S

Clustal Consensus \*\*\* \*\*\*\*\* \* \* \*\*\*\*\* \* \* \*\*\*\*\* \* \* \*\*\*\*\*

4310 4320 4330 4340 4350 4360 4370 4380 4390 4400

Ref\_Genome CCAGCAACGCTCAAGAGTTTGTCTTACAGGGAAGAAGATTCTGGTGGTTGATGATAATATGGTGAACAGAAAGAGTAGCTGCAGGAGCTCTGAAGAAGTTTG

Ref\_CDS CCAGCAACGCTCAAGAGTTTGTCTTACAGGGAAGAAGATTCTGGTGGTTGATGATAATATGGTGAACAGAAAGAGTAGCTGCAGGAGCTCTGAAGAAGTTTG  
P A T L K S L L T G K K I L V V D D N M V N R R V A A G A L K K F

Hua\_5\_Genome CCAGCAACGCTCAAGAGTTTGTCTTACAGGGAAGAAGATTCTGGTGGTTGATGATAATATGGTGAACAGAAAGAGTAGCTGCAGGAGCTCTGAAGAAGTTTG

Hua\_5\_CDS CCAGCAACGCTCAAGAGTTTGTCTTACAGGGAAGAAGATTCTGGTGGTTGATGATAATATGGTGAACAGAAAGAGTAGCTGCAGGAGCTCTGAAGAAGTTTG

J7005\_Genome CCAGCAACGCTCAAGAGTTTGTCTTACAGGGAAGAAGATTCTGGTGGTTGATGATAATATGGTGAACAGAAAGAGTAGCTGCAGGAGCTCTGAAGAAGTTTG

J7005\_CDS CCAGCAACGCTCAAGAGTTTGTCTTACAGGGAAGAAGATTCTGGTGGTTGATGATAATATGGTGAACAGAAAGAGTAGCTGCAGGAGCTCTGAAGAAGTTTG  
P A T L K S L L T G K K I L V V D D N M V N R R V A A G A L K K F

AtAHK4 CCGCAACTCTCAAGAGCTTGTCTTACAGGGAAGAAGATTCTTGTGGTTGATGATAATATAGTTAACAGGAGAGTAGCTGCAGGAGCTCTCAAGAAATTG  
P A T L K S L L T G K K I L V V D D N I V N R R V A A G A L K K F

Clustal Consensus \*\* \*\*\*\*\* \*\*\*\*\* \*\*\*\*\* \*\*\*\*\* \*\*\*\*\* \*\*\*\*\* \*\*\*\*\* \*\*\*\*\* \*\*\*\*\*

4410 4420 4430 4440 4450 4460 4470 4480 4490 4500

Ref\_Genome GAGCAGAGGTGGTGTGTGCAGAGAGTGGTCAAGTTGCTTTGGGTTTGTTCAGATTCCACACAGTTTCGATGCTTGCTTCATGGATATTCAAATGCCTCA

Ref\_CDS GAGCAGAGGTGGTGTGTGCAGAGAGTGGTCAAGTTGCTTTGGGTTTGTTCAGATTCCACACAGTTTCGATGCTTGCTTCATGGATATTCAAATGCCTCA  
G A E V V C A E S G Q V A L G L L Q I P H S F D A C F M D I Q M P Q

Hua\_5\_Genome GAGCAGAGGTGGTGTGTGCAGAGAGTGGTCAAGTTGCTTTGGGTTTGTTCAGATTCCACACAGTTTCGATGCTTGCTTCATGGATATTCAAATGCCTCA

Hua\_5\_CDS GAGCAGAGGTGGTGTGTGCAGAGAGTGGTCAAGTTGCTTTGGGTTTGTTCAGATTCCACACAGTTTCGATGCTTGCTTCATGGATATTCAAATGCCTCA

J7005\_Genome GAGCAGAGGTGGTGTGTGCAGAGAGTGGTCAAGTTGCTTTGGGTTTGTTCAGATTCCACACAGTTTCGATGCTTGCTTCATGGATATTCAAATGCCTCA

J7005\_CDS GAGCAGAGGTGGTGTGTGCAGAGAGTGGTCAAGTTGCTTTGGGTTTGTTCAGATTCCACACAGTTTCGATGCTTGCTTCATGGATATTCAAATGCCTCA  
G A E V V C A E S G Q V A L G L L Q I P H S F D A C F M D I Q M P Q

AtAHK4 GAGCAGAAGTGGTTTGTGCAGAGAGTGGTCAAGTTGCTTTGGGTTTGTTCAGATTCCACACACTTTCGATGCTTGCTTCATGGATATTCAAATGCCACA  
G A E V V C A E S G Q V A L G L L Q I P H T F D A C F M D I Q M P Q

Clustal Consensus \*\*\*\*\* \*\*\*\*\* \*\*\*\*\* \*\*\*\*\* \*\*\*\*\* \*\*\*\*\* \*\*\*\*\* \*\*\*\*\* \*\*\*\*\* \*\*\*\*\*

4510 4520 4530 4540 4550 4560 4570 4580 4590 4600

Ref\_Genome GATGGACGGGTAAAGCCTTTAAACTTGGCCTGCTGTCGGTAGCTCGAATTTTCGGTTAGTTTCGGCTCAACATAAATCTTACC GAATTA-ATCCAAAATAAA

Ref\_CDS GATGGACGGG-----  
M D G

Hua\_5\_Genome GATGGACGGGTAAAGCCTTTAAACTTGGCCTGCTGTCGGTAGCTCGAATTTTCGGTTAGTTTCGGCTCAACATAAATCTTACC GAATTAATAATCCAAAATAAA

Hua\_5\_CDS GATGGACGGG-----

J7005\_Genome GATGGACGGGTAAAGCCTTTAAACTTGGCCTGCTGTCGGTAGCTCGAATTTTCGGTTAGTTTCGGCTCAACATAAATCTTACC GAATTA-ATCCAAAATAAA

J7005\_CDS GATGGACGGG-----  
M D G

AtAHK4 GATGGACGGA-----  
M D G

Clustal Consensus \*\*\*\*\*

4610 4620 4630 4640 4650 4660 4670 4680 4690 4700

Ref\_Genome GTTTGGTTCGGTATTTCGGTTAGTTGGTTTTTGAATAATCGTACATAAGTTTTTGAATTTGGGTTTATATTTTGAATTAATTTTGGTTAAAAATTCGGATGAGT

Ref\_CDS -----

Hua\_5\_Genome GTTTGGTTCGGTATTTCGGTTAGTTGGTTTTTGAATAATCGTACATAAGTTTTTGAATTTGGGTTTATATTTTGAATTAATTTTGGTTAAAAATTCGGATGAGT

Hua\_5\_CDS -----

J7005\_Genome GTTTGGTTCGGTATTTCGGTTAGTTGGTTTTTGAATAATCGTACATAAGTTTTTGAATTTGGGTTTATATTTTGAATTAATTTTGGTTAAAAATTCGGATGAGT

J7005\_CDS -----

AtAHK4 -----

Clustal Consensus -----

4710 4720 4730 4740 4750 4760 4770 4780 4790 4800

Ref\_Genome TCGGTTTGTTCGATTTGGTTTTTGAATTCGTTGGTTATTTTTTTTTAAAGAAAACCAAGTAACCGATTGCCAAACCAACCCTTTTCAAACCTACAAA

```

Ref_CDS -----

Hua_5_Genome TCGGTTGGTTCGGTTTGGGTTTTTGGATATTGTTTGGTATTTTTTTTTAAAGAAAACCAAGTAACCGATTGCCAAACCAAACTTTTCAAACCTACAAA
Hua_5_CDS -----

J7005_Genome TCGGTTTGTTCGATTGGGTTTTTGGATATTGTTTGGTATTTTTTTTTAAAGAAAACCAAGTAACCGATTGCCAAACCAAACTTTTCAAACCTACAAA
J7005_CDS -----

AtAHK4 -----

Clustal Consensus
      4810      4820      4830      4840      4850      4860      4870      4880      4890      4900
.....|.....|.....|.....|.....|.....|.....|.....|.....|.....|.....|
Ref_Genome ATCGAACCAAACTCTCAACTTTTTTGGTTCGGTTCAAAATCCCAGCCCTACTTAAACTCATTAGTTTGGTCTTGTACTACTTGGTTTACGTTCTGGTTT
Ref_CDS -----

Hua_5_Genome ATCGAACCAAACTCTCAACTTTTTTGGTTCGGTTCAAAATCCCAGCCCTACTTAAACTCATTAGTTTGGTCTTGTACTACTTGGTTTACGTTCTGGTTT
Hua_5_CDS -----

J7005_Genome ATCGAACCAAACTCTCAACTTTTTTGGTTCGGTTCAAAATCCCAGCCCTACTTAAACTCATTAGTTTGGTCTTGTACTACTTGGTTTACGTTCTGGTTT
J7005_CDS -----

AtAHK4 -----

Clustal Consensus
      4910      4920      4930      4940      4950      4960      4970      4980      4990      5000
.....|.....|.....|.....|.....|.....|.....|.....|.....|.....|.....|
Ref_Genome TGTTCCTCTCAGGTTTGAAGCGACTCGTCAGATAAGGATGATGGAGAAGGAAGCTAAAGAGAAGACGAAGCTGGAATGGCATTACCGATTCCTAGCCATG
Ref_CDS -----TTTGAAGCGACTCGTCAGATAAGGATGATGGAGAAGGAAGCTAAAGAGAAGACGAAGCTGGAATGGCATTACCGATTCCTAGCCATG
      F E A T R Q I R M M E K E A K E K T K L E W H L P I L A M
Hua_5_Genome TGTTCCTCTCAGGTTTGAAGCGACTCGTCAGATAAGGATGATGGAGAAGGAAGCTAAAGAGAAGACGAAGCTGGAATGGCATTACCGATTCCTAGCCATG
Hua_5_CDS -----TTTGAAGCGACTCGTCAGATAAGGATGATGGAGAAGGAAGCTAAAGAGAAGACGAAGCTGGAATGGCATTACCGATTCCTAGCCATG

J7005_Genome TGTTCCTCTCAGGTTTGAAGCGACTCGTCAGATAAGGATGATGGAGAAGGAAGCTAAAGAGAAGACGAAGCTGGAATGGCATTACCGATTCCTAGCCATG
J7005_CDS -----TTTGAAGCGACTCGTCAGATAAGGATGATGGAGAAGGAAGCTAAAGAGAAGACGAAGCTGGAATGGCATTACCGATTCCTAGCCATG
      F E A T R Q I R M M E K E A K E K T K L E W H L P I L A M
AtAHK4 -----TTTGAAGCAACTCGTCAGATAAGAATGATGGAGAAGGAAGCTAAAGAGAAGCAAATCTGGAATGGCATTACCGATTCCTAGCCATG
      F E A T R Q I R M M E K E T K E K T N L E W H L P I L A M
Clustal Consensus ***** ***** ***** ***** ***** ** * ***** ***** *****

      5010      5020      5030      5040      5050      5060      5070      5080      5090      5100
.....|.....|.....|.....|.....|.....|.....|.....|.....|.....|.....|
Ref_Genome ACAGCTGATGTGATCCACGCGACATACGAGGAGTGTCTGAAAAGTGGAAATGGATGGTTATGTCTCTAAACCATTTGAAAGAGAGAAATCTCTACAAGTCTG
Ref_CDS -----ACAGCTGATGTGATCCACGCGACATACGAGGAGTGTCTGAAAAGTGGAAATGGATGGTTATGTCTCTAAACCATTTGAAAGAGAGAAATCTCTACAAGTCTG
      T A D V I H A T Y E E C L K S G M D G Y V S K P F E E E N L Y K S
Hua_5_Genome ACAGCTGATGTGATCCACGCGACATACGAGGAGTGTCTGAAAAGTGGAAATGGATGGTTATGTCTCTAAACCATTTGAAAGAGAGAAATCTCTACAAGTCTG
Hua_5_CDS -----ACAGCTGATGTGATCCACGCGACATACGAGGAGTGTCTGAAAAGTGGAAATGGATGGTTATGTCTCTAAACCATTTGAAAGAGAGAAATCTCTACAAGTCTG

J7005_Genome ACAGCTGATGTGATCCACGCGACATACGAGGAGTGTCTGAAAAGTGGAAATGGATGGTTATGTCTCTAAACCATTTGAAAGAGAGAAATCTCTACAAGTCTG
J7005_CDS -----ACAGCTGATGTGATCCACGCGACATACGAGGAGTGTCTGAAAAGTGGAAATGGATGGTTATGTCTCTAAACCATTTGAAAGAGAGAAATCTCTACAAGTCTG
      T A D V I H A T Y E E C L K S G M D G Y V S K P F E E E N L Y K S
AtAHK4 -----ACTGCGGATGTGATACACGCGACCTACGAGGAAATGTCTGAAAAGTGGAAATGGATGGTTACGTCTCCAACCTTTTGAAGAGAGAAATCTCTATAAATCCG
      T A D V I H A T Y E E C L K S G M D G Y V S K P F E E E N L Y K S
Clustal Consensus ** * ***** ***** ***** ***** ***** ***** ***** ***** ***** *****

      5110      5120      5130      5140      5150
.....|.....|.....|.....|.....|
Ref_Genome TTGCCAAATCATTTCAAAGCTAAACCAATCTCAGATTCGTATGATAGCCAAAGTTGA
Ref_CDS -----TTGCCAAATCATTTCAAAGCTAAACCAATCTCAGATTCGTATGATAGCCAAAGTTGA
      V A K S F K A N P I S D S S C S Q S *
Hua_5_Genome TTGCCAAATCATTTCAAAGCTAAACCAATCTCAGATTCGTATGATAGCCAAAGTTGA
Hua_5_CDS -----TTGCCAAATCATTTCAAAGCTAAACCAATCTCAGATTCGTATGATAGCCAAAGTTGA

J7005_Genome TTGCCAAATCATTTCAAAGCTAAACCAATCTCAGATTCGTATGATAGCCAAAGTTGA
J7005_CDS -----TTGCCAAATCATTTCAAAGCTAAACCAATCTCAGATTCGTATGATAGCCAAAGTTGA
      V A K S F K A N P I S D S S C S Q S *
AtAHK4 -----TTGCCAAATCATTTCAAACCTAATCCTATCTCACCTTCGTGTA-----
      V A K S F K P N P I S P S S *

```

**Supplementary Figure S7.** Alignment of the nucleotide sequences of *AHK4* genes (genomic and CDS sequences of BnaC07g21260D) and predicated AHK4 amino acid sequences from *Brassica napus* reference genome (Darmor-*bzh*), the two parents (Hua\_5 and J7005), and Arabidopsis (AT2G01830.1). The red box refers to the premature termination of amino acid translation caused by point mutation in Hua\_5.
